# Supplementary material
Source: PubMed Central journal article supplement (PMC4830693)
Supplement: NIHMS749890-supplement-Supplementary_Information.pdf [file NIHMS749890-supplement-Supplementary_Information.pdf]

**Pan-cancer analysis of the extent and consequences of  
intra-tumor heterogeneity**

**SUPPLEMENTARY INFORMATION**

Noemi Andor, Trevor A. Graham, Marnix Jansen, Li C. Xia, C. Athena Aktipis, Claudia Petritsch, Hanlee P. Ji,  
Carlo C. Maley

## Table of Contents

|                                                                                                                                      |                                     |
|--------------------------------------------------------------------------------------------------------------------------------------|-------------------------------------|
| <b>1. STUDY DESIGN, SEQUENCING DATA, HISTOLOGICAL DATA, CLINICAL DATA .....</b>                                                      | <b>4</b>                            |
| SUPPLEMENTARY FIGURE 1.1.....                                                                                                        | 4                                   |
| SUPPLEMENTARY NOTE 1.2: TCGA SEQUENCING DATA.....                                                                                    | 5                                   |
| SUPPLEMENTARY FIGURE 1.3.....                                                                                                        | 6                                   |
| SUPPLEMENTARY TABLE 1.4.....                                                                                                         | 7                                   |
| <b>2. QUANTIFICATION OF INTRA-TUMOR HETEROGENEITY .....</b>                                                                          | <b>24</b>                           |
| SUPPLEMENTARY NOTE 2.1: QUANTIFICATION OF GENETIC ITH.....                                                                           | 24                                  |
| SUPPLEMENTARY FIGURE 2.1.....                                                                                                        | 25                                  |
| SUPPLEMENTARY FIGURE 2.2.....                                                                                                        | 26                                  |
| SUPPLEMENTARY FIGURE 2.3.....                                                                                                        | 27                                  |
| SUPPLEMENTARY NOTE 2.4: RELATION BETWEEN TUMOR PURITY AND CLONAL RESOLUTION.....                                                     | 28                                  |
| SUPPLEMENTARY FIGURE 2.4.....                                                                                                        | 28                                  |
| SUPPLEMENTARY NOTE 2.5: QUANTIFICATION OF NUCLEAR ITH BY H&E IMAGE ANALYSIS.....                                                     | 29                                  |
| SUPPLEMENTARY FIGURE 2.5.....                                                                                                        | 29                                  |
| SUPPLEMENTARY FIGURE 2.6.....                                                                                                        | 30                                  |
| SUPPLEMENTARY FIGURE 2.7.....                                                                                                        | <b>ERROR! BOOKMARK NOT DEFINED.</b> |
| <b>3. MUTATION ACCUMULATION, INTRA-TUMOR NUCLEAR HETEROGENEITY AND INTRA-TUMOR<br/>GENETIC HETEROGENEITY: DATA INTEGRATION .....</b> | <b>32</b>                           |
| SUPPLEMENTARY TABLE 3.1 .....                                                                                                        | 32                                  |
| SUPPLEMENTARY FIGURE 3.2.....                                                                                                        | 39                                  |
| SUPPLEMENTARY FIGURE 3.3.....                                                                                                        | 40                                  |
| SUPPLEMENTARY TABLE 3.4.....                                                                                                         | 41                                  |
| SUPPLEMENTARY TABLE 3.5 .....                                                                                                        | 41                                  |
| <b>4. IDENTIFICATION OF CANCER TYPE DEPENDENT AND UNIVERSAL BIOMARKERS OF<br/>PROGRESSION FREE AND OVERALL SURVIVAL .....</b>        | <b>43</b>                           |
| SUPPLEMENTARY TABLE 4.1 .....                                                                                                        | 43                                  |

|                               |           |
|-------------------------------|-----------|
| SUPPLEMENTARY TABLE 4.2.....  | 44        |
| SUPPLEMENTARY TABLE 4.3.....  | 46        |
| SUPPLEMENTARY FIGURE 4.4..... | 48        |
| SUPPLEMENTARY FIGURE 4.5..... | 49        |
| SUPPLEMENTARY TABLE 4.6.....  | 51        |
| SUPPLEMENTARY FIGURE 4.7..... | 52        |
| SUPPLEMENTARY FIGURE 4.8..... | 53        |
| SUPPLEMENTARY FIGURE 4.9..... | 54        |
| SUPPLEMENTARY TABLE 4.10..... | 55        |
| <b>REFERENCES.....</b>        | <b>58</b> |

# 1. Study design, sequencing data, histological data, clinical data

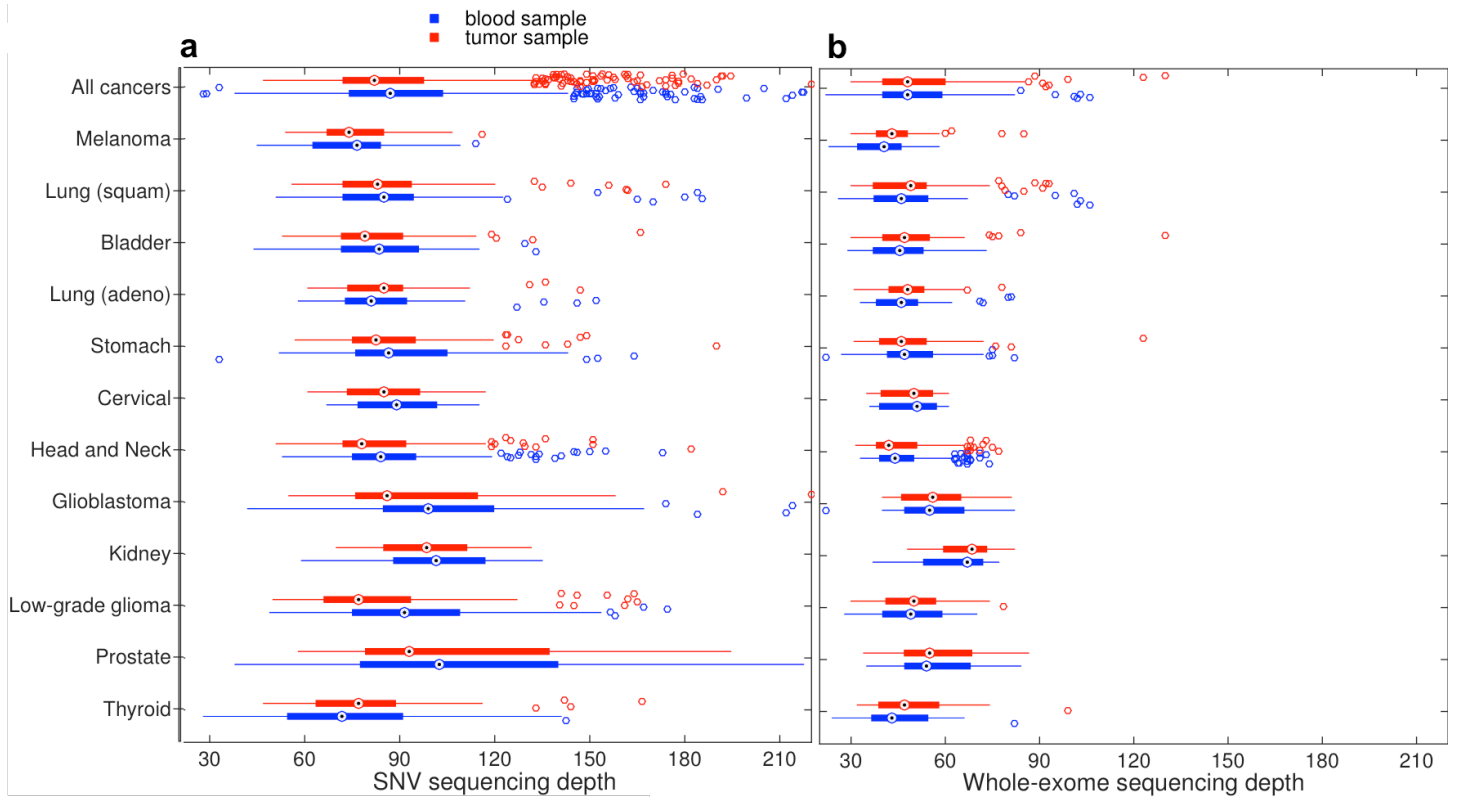

## Supplementary Figure 1.1

**Sequencing depth of analyzed TCGA exome sequencing data.** Shown is the median and inter-quartile range of sequencing depth in 1,165 exome sequenced tumor samples and matched blood samples, stratified by cancer type. Sequencing depth is shown **(a)** at loci with called somatic SNVs and **(b)** across all sequenced regions.

## Supplementary Note 1.2: TCGA sequencing data

Raw whole exome sequencing data obtained from tumor samples and matched control samples, on the Illumina sequencing platform, was downloaded from TCGA (Study Accession: *phs000178.v8.p7*) as Binary Alignment/Map (BAM) files.

To facilitate relative comparison of intra-tumor heterogeneity between tumors and cancer types, based on one single sample per tumor, sample selection was designed to obtain high, yet uniformly distributed data quality across the analyzed samples<sup>1</sup>. Inclusion criteria were as follows:

- Availability of sequencing data from matched blood for each tumor sample sequenced.
- Each BAM file obtained from aligning sequencing reads against the HG19 Broad variant (<http://www.broadinstitute.org/ftp/pub/seq/references/>).
- To reduce inconsistencies between samples and biases related to the sequencing procedure and to preprocessing steps (alignment to the reference genome, indel realignment, base recalibration and duplicate marking), all samples were required to be sequenced by the same sequencing center: the Broad Institute (one out of TCGA's three Genome sequencing centers).
- Tumor samples have at least 30 fold average coverage.
- Absence of neo-adjuvant therapy prior to sample collection.

These criteria applied to 1,165 analyzed tumor samples from 1,165 individuals, which were included in this study. According to TCGA's histological quantifications, the percentage of tumor cells was above 55% in 90% of the analyzed samples. Clinical information associated with the downloaded files is listed in Supplementary Table 1.4.

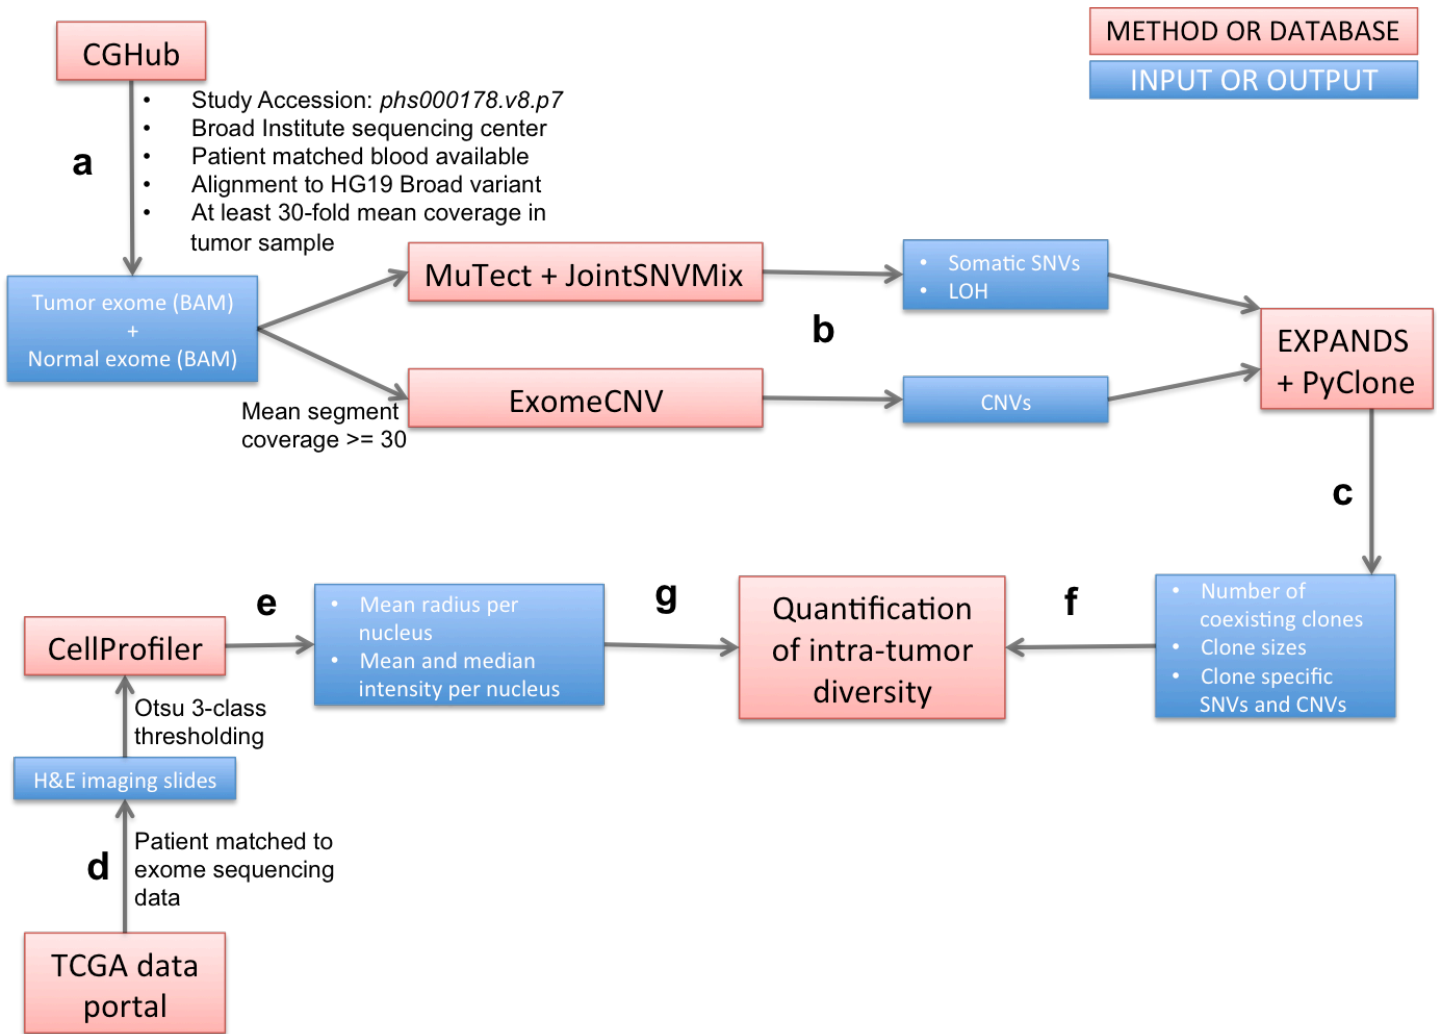

**Supplementary Figure 1.3**

**Workflow diagram of pan-cancer analysis of ITH.**

(a) Raw whole exome sequencing data was downloaded for 1,165 tumor specimens obtained from 1,165 individuals diagnosed with cancer. (b) Copy-number segmentation was calculated with ExomeCNV<sup>2</sup>. Somatic point mutations and LOH were inferred with Mutect<sup>3</sup> and JointSNVMix<sup>4</sup>. SNVs outlying autosomes or that cannot be explained by a clone present in 10% or more of the sample (i.e. allele frequency  $\times$  copy number  $< 0.1$ ) were excluded. The implemented mutation-calling pipeline is optimized for the quantification of ITH rather than driver mutation discovery. I.e. accurate quantitative assessment of the allelic frequency of a SNV has a high priority. If such assessment is likely imprecise, (due to low sequencing coverage), the SNV is excluded. (c) The clonal composition of each tumor was inferred with EXPANDS<sup>1</sup> and PyClone<sup>5</sup> from the detected copy-number segments and SNVs. (d) Tumor H&E imaging slides were available for 930 individuals (subset from a). (e) Nuclei were detected with CellProfiler<sup>6</sup> software in representative H&E stainings for each specimen and the size and staining intensity of each nucleus was recorded. Intra-tumor diversity measures were quantified for (f) genetic and (g) histological features. The chosen values for method-parameters or output-thresholds are noted on the arrows. Parameter/output definitions are available in the documentation of the corresponding method.

## Supplementary Table 1.4

**Clinical annotation of analyzed TCGA samples.** Cancer type, overall survival and progression free survival are shown for individuals across 12 cancer types. Of the 1,165 individuals, 8 (0.7%) had missing overall and progression-free survival, without any follow-up time available. A value of 1 in column “censored” indicates that the corresponding entry in the prior column is censored. Pathologic stage and administration of adjuvant chemo- and radiation therapy are indicated. NA := not available.

| TCGA patient barcode | cancer type | days to death | censored | days to progression | censored | stage | chemo-therapy | radiation-therapy |
|----------------------|-------------|---------------|----------|---------------------|----------|-------|---------------|-------------------|
| TCGA-EL-A3CT         | THCA        | 1825          | 1        | 1825                | 1        | 4     | 0             | 0                 |
| TCGA-EL-A3CU         | THCA        | 1825          | 1        | 1825                | 1        | 1     | 0             | 1                 |
| TCGA-EL-A3GR         | THCA        | 1825          | 1        | 1825                | 1        | 2     | 0             | 1                 |
| TCGA-EL-A3GY         | THCA        | 1825          | 1        | 1825                | 1        | 2     | 0             | 1                 |
| TCGA-EL-A3H5         | THCA        | 1825          | 1        | 1825                | 1        | 4     | 0             | 1                 |
| TCGA-EL-A3GQ         | THCA        | 1528          | 1        | 1528                | 1        | 1     | 0             | 0                 |
| TCGA-BJ-A192         | THCA        | 1349          | 1        | 1349                | 1        | 2     | 0             | 0                 |
| TCGA-EL-A3CV         | THCA        | 1154          | 1        | 1154                | 1        | 3     | 0             | 1                 |
| TCGA-DJ-A3V0         | THCA        | 1125          | 1        | 1125                | 1        | 4     | 0             | 1                 |
| TCGA-DJ-A2Q0         | THCA        | 1045          | 1        | 1045                | 1        | 1     | 0             | 0                 |
| TCGA-EL-A3CL         | THCA        | 963           | 0        | 963                 | 0        | 1     | 0             | 0                 |
| TCGA-DJ-A3VM         | THCA        | 840           | 1        | 840                 | 1        | 1     | 0             | 1                 |
| TCGA-DJ-A3V6         | THCA        | 818           | 1        | 818                 | 1        | 2     | 0             | 1                 |
| TCGA-EM-A1CS         | THCA        | 817           | 1        | 817                 | 1        | 1     | 0             | 0                 |
| TCGA-BJ-A0YZ         | THCA        | 754           | 1        | 754                 | 1        | 1     | 0             | 0                 |
| TCGA-EL-A4KG         | THCA        | 739           | 1        | 739                 | 1        | 1     | 0             | 0                 |
| TCGA-EL-A4KI         | THCA        | 727           | 1        | 727                 | 1        | 2     | 0             | 1                 |
| TCGA-BJ-A4O9         | THCA        | 714           | 1        | 714                 | 1        | 1     | 0             | 0                 |
| TCGA-DJ-A3V7         | THCA        | 706           | 1        | 706                 | 1        | 2     | 0             | 1                 |
| TCGA-DJ-A3VB         | THCA        | 697           | 1        | 697                 | 1        | 3     | 0             | 1                 |
| TCGA-DO-A1K0         | THCA        | 655           | 1        | 655                 | 1        | 3     | 0             | 1                 |
| TCGA-DJ-A3VD         | THCA        | 639           | 1        | 639                 | 1        | 1     | 0             | 1                 |
| TCGA-DJ-A3V9         | THCA        | 623           | 1        | 623                 | 1        | 2     | 0             | 1                 |
| TCGA-EM-A1YB         | THCA        | 592           | 1        | 592                 | 1        | 1     | 0             | 1                 |
| TCGA-DJ-A4UQ         | THCA        | 580           | 1        | 580                 | 1        | 3     | 0             | 1                 |
| TCGA-DJ-A3VE         | THCA        | 577           | 1        | 577                 | 1        | 1     | 0             | 0                 |
| TCGA-BJ-A3PU         | THCA        | 567           | 1        | 567                 | 1        | 3     | 0             | 1                 |
| TCGA-BJ-A0Z2         | THCA        | 554           | 1        | 554                 | 1        | 2     | 0             | 1                 |
| TCGA-DJ-A4UL         | THCA        | 554           | 1        | 554                 | 1        | 1     | 0             | 0                 |
| TCGA-EM-A1CT         | THCA        | 553           | 1        | 553                 | 1        | 1     | 0             | 1                 |
| TCGA-EM-A2P2         | THCA        | 526           | 1        | 526                 | 1        | 2     | 0             | 1                 |
| TCGA-DJ-A3VL         | THCA        | 524           | 1        | 524                 | 1        | 1     | 0             | 0                 |
| TCGA-BJ-A0ZE         | THCA        | 509           | 1        | 509                 | 1        | 2     | 0             | 0                 |
| TCGA-BJ-A3EZ         | THCA        | 487           | 1        | 487                 | 1        | 3     | 0             | 1                 |
| TCGA-DE-A0Y2         | THCA        | 469           | 1        | 469                 | 1        | 2     | 0             | 0                 |
| TCGA-DJ-A4UR         | THCA        | 469           | 1        | 469                 | 1        | 4     | 0             | 1                 |
| TCGA-DJ-A4UW         | THCA        | 447           | 1        | 447                 | 1        | 1     | 0             | 1                 |
| TCGA-EM-A3O3         | THCA        | 441           | 1        | 441                 | 1        | 2     | 0             | 1                 |
| TCGA-E8-A417         | THCA        | 434           | 1        | 434                 | 1        | 2     | 0             | 0                 |
| TCGA-E3-A3E5         | THCA        | 427           | 1        | 427                 | 1        | 4     | 0             | 1                 |
| TCGA-BJ-A0Z0         | THCA        | 419           | 1        | 419                 | 1        | 1     | 0             | 0                 |
| TCGA-DJ-A2QA         | THCA        | 378           | 1        | 378                 | 1        | 2     | 0             | 0                 |
| TCGA-E3-A3DZ         | THCA        | 367           | 1        | 367                 | 1        | 2     | 0             | 1                 |
| TCGA-EM-A2CM         | THCA        | 357           | 1        | 357                 | 1        | 2     | 0             | 1                 |
| TCGA-DE-A4MB         | THCA        | 352           | 1        | 352                 | 1        | 3     | 0             | 1                 |
| TCGA-DJ-A13M         | THCA        | 287           | 1        | 287                 | 1        | 1     | 0             | 0                 |
| TCGA-EM-A3AP         | THCA        | 254           | 1        | 254                 | 1        | 1     | 0             | 0                 |
| TCGA-DJ-A3VG         | THCA        | 253           | 1        | 253                 | 1        | 1     | 0             | 0                 |
| TCGA-BJ-A0Z9         | THCA        | 251           | 1        | 251                 | 1        | 2     | 0             | 1                 |
| TCGA-DJ-A2PO         | THCA        | 243           | 1        | 243                 | 1        | 1     | 0             | 0                 |
| TCGA-E8-A437         | THCA        | 234           | 1        | 234                 | 1        | NA    | 0             | 0                 |
| TCGA-DJ-A1QL         | THCA        | 219           | 1        | 219                 | 1        | 1     | 0             | 0                 |
| TCGA-DJ-A1QG         | THCA        | 212           | 1        | 212                 | 1        | 1     | 0             | 0                 |
| TCGA-DJ-A2PP         | THCA        | 162           | 1        | 162                 | 1        | 1     | 0             | 0                 |
| TCGA-BJ-A28V         | THCA        | 155           | 1        | 155                 | 1        | 2     | 0             | 0                 |
| TCGA-BJ-A0ZB         | THCA        | 122           | 1        | 122                 | 1        | 3     | 0             | 0                 |
| TCGA-DJ-A13R         | THCA        | 92            | 1        | 92                  | 1        | 2     | 0             | 0                 |
| TCGA-E8-A418         | THCA        | 92            | 1        | 92                  | 1        | 3     | 0             | 0                 |

|              |      |      |    |      |    |   |   |   |
|--------------|------|------|----|------|----|---|---|---|
| TCGA-BJ-A28Z | THCA | 37   | 1  | 37   | 1  | 3 | 0 | 0 |
| TCGA-CE-A484 | THCA | 12   | 1  | 12   | 1  | 2 | 0 | 0 |
| TCGA-HF-7131 | STAD | NA   | NA | NA   | NA | 1 | 0 | 1 |
| TCGA-HF-7132 | STAD | NA   | NA | NA   | NA | 2 | 1 | 1 |
| TCGA-HF-7133 | STAD | NA   | NA | NA   | NA | 4 | 1 | 1 |
| TCGA-HF-7134 | STAD | NA   | NA | NA   | NA | 1 | 0 | 0 |
| TCGA-CG-4438 | STAD | 1645 | 1  | 1645 | 1  | 4 | 0 | 0 |
| TCGA-CG-4444 | STAD | 1431 | 1  | 1431 | 1  | 3 | 1 | 1 |
| TCGA-CG-5718 | STAD | 1095 | 0  | 1095 | 0  | 2 | 0 | 0 |
| TCGA-BR-7704 | STAD | 1072 | 1  | 1072 | 1  | 2 | 0 | 0 |
| TCGA-BR-6852 | STAD | 1002 | 1  | 1002 | 1  | 2 | 0 | 0 |
| TCGA-BR-6566 | STAD | 997  | 1  | 997  | 1  | 2 | 0 | 0 |
| TCGA-CG-4477 | STAD | 942  | 1  | 365  | 0  | 1 | 1 | 1 |
| TCGA-BR-6802 | STAD | 940  | 1  | 807  | 0  | 4 | 0 | 0 |
| TCGA-CG-4443 | STAD | 912  | 1  | 912  | 1  | 1 | 0 | 0 |
| TCGA-HU-A4GN | STAD | 912  | 1  | 912  | 1  | 2 | 1 | 0 |
| TCGA-BR-7716 | STAD | 852  | 1  | 852  | 1  | 3 | 0 | 0 |
| TCGA-HU-A4HD | STAD | 834  | 1  | 834  | 1  | 4 | 0 | 0 |
| TCGA-CG-4304 | STAD | 822  | 1  | 822  | 1  | 1 | 0 | 0 |
| TCGA-HJ-7597 | STAD | 805  | 0  | 795  | 0  | 1 | 1 | 1 |
| TCGA-HU-A4GF | STAD | 785  | 1  | 785  | 1  | 2 | 0 | 0 |
| TCGA-BR-6705 | STAD | 779  | 0  | 779  | 0  | 4 | 0 | 0 |
| TCGA-BR-8484 | STAD | 766  | 0  | 766  | 0  | 4 | 0 | 0 |
| TCGA-BR-7703 | STAD | 753  | 1  | 753  | 1  | 1 | 0 | 0 |
| TCGA-HU-A4G2 | STAD | 739  | 1  | 739  | 1  | 3 | 1 | 0 |
| TCGA-HU-A4G9 | STAD | 736  | 1  | 736  | 1  | 1 | 0 | 0 |
| TCGA-BR-7707 | STAD | 728  | 1  | 728  | 1  | 1 | 0 | 0 |
| TCGA-CG-4475 | STAD | 699  | 1  | 699  | 1  | 3 | 0 | 0 |
| TCGA-HU-A4GD | STAD | 692  | 1  | 692  | 1  | 3 | 1 | 0 |
| TCGA-FP-7998 | STAD | 678  | 1  | 678  | 1  | 4 | 1 | 0 |
| TCGA-BR-A4CQ | STAD | 677  | 1  | 677  | 1  | 4 | 0 | 0 |
| TCGA-BR-6801 | STAD | 642  | 1  | 642  | 1  | 2 | 0 | 0 |
| TCGA-BR-A4PD | STAD | 628  | 1  | 628  | 1  | 3 | 0 | 0 |
| TCGA-BR-8081 | STAD | 625  | 1  | 625  | 1  | 3 | 0 | 0 |
| TCGA-BR-A4PE | STAD | 621  | 1  | 621  | 1  | 1 | 0 | 0 |
| TCGA-BR-8486 | STAD | 615  | 1  | 615  | 1  | 1 | 0 | 0 |
| TCGA-CG-4300 | STAD | 609  | 0  | 609  | 0  | 4 | 0 | 0 |
| TCGA-BR-6707 | STAD | 605  | 0  | 426  | 0  | 2 | 1 | 0 |
| TCGA-MX-A5UJ | STAD | 600  | 1  | 600  | 1  | 4 | 0 | 0 |
| TCGA-FP-7829 | STAD | 594  | 1  | 594  | 1  | 3 | 1 | 1 |
| TCGA-BR-8361 | STAD | 593  | 1  | 593  | 1  | 4 | 0 | 0 |
| TCGA-HU-A4H3 | STAD | 589  | 1  | 589  | 1  | 4 | 1 | 1 |
| TCGA-CG-4449 | STAD | 580  | 1  | 336  | 0  | 2 | 0 | 0 |
| TCGA-CG-4466 | STAD | 577  | 1  | 577  | 1  | 1 | 0 | 0 |
| TCGA-D7-6520 | STAD | 573  | 1  | 46   | 0  | 3 | 0 | 1 |
| TCGA-BR-7959 | STAD | 569  | 1  | 569  | 1  | 4 | 1 | 0 |
| TCGA-D7-6521 | STAD | 564  | 1  | 192  | 0  | 3 | 1 | 0 |
| TCGA-BR-7717 | STAD | 552  | 0  | 552  | 0  | 4 | 0 | 0 |
| TCGA-BR-6706 | STAD | 549  | 0  | 402  | 0  | 3 | 1 | 0 |
| TCGA-D7-A4YU | STAD | 500  | 1  | 500  | 1  | 4 | 1 | 0 |
| TCGA-EQ-A4SO | STAD | 494  | 1  | 494  | 1  | 4 | 1 | 1 |
| TCGA-D7-6815 | STAD | 486  | 1  | 486  | 1  | 3 | 0 | 0 |
| TCGA-BR-8589 | STAD | 481  | 1  | 481  | 1  | 4 | 0 | 0 |
| TCGA-BR-8680 | STAD | 481  | 1  | 481  | 1  | 4 | 1 | 0 |
| TCGA-BR-8296 | STAD | 474  | 0  | 390  | 0  | 4 | 0 | 0 |
| TCGA-BR-7722 | STAD | 466  | 0  | 466  | 0  | 3 | 0 | 0 |
| TCGA-D7-6528 | STAD | 463  | 1  | 463  | 1  | 1 | 0 | 0 |
| TCGA-D7-A4YX | STAD | 461  | 1  | 461  | 1  | 3 | 0 | 0 |
| TCGA-BR-8373 | STAD | 450  | 1  | 450  | 1  | 4 | 1 | 0 |
| TCGA-D7-A4Z0 | STAD | 449  | 1  | 449  | 1  | 2 | 0 | 1 |
| TCGA-D7-8576 | STAD | 446  | 0  | 204  | 0  | 4 | 0 | 1 |
| TCGA-F1-6874 | STAD | 440  | 1  | 440  | 1  | 1 | 0 | 0 |
| TCGA-BR-A4J2 | STAD | 431  | 1  | 431  | 1  | 3 | 1 | 0 |
| TCGA-FP-7916 | STAD | 428  | 0  | 428  | 0  | 4 | 1 | 0 |
| TCGA-BR-8369 | STAD | 427  | 1  | 419  | 0  | 4 | 0 | 1 |
| TCGA-BR-A44U | STAD | 422  | 0  | 422  | 0  | 4 | 0 | 0 |
| TCGA-D7-A4YY | STAD | 419  | 1  | 419  | 1  | 4 | 0 | 1 |
| TCGA-BR-A4J8 | STAD | 411  | 1  | 411  | 1  | 4 | 1 | 0 |
| TCGA-D7-6525 | STAD | 406  | 0  | 171  | 0  | 3 | 1 | 0 |
| TCGA-CD-5801 | STAD | 401  | 0  | 401  | 0  | 3 | 0 | 0 |



|              |      |     |   |     |   |   |   |   |
|--------------|------|-----|---|-----|---|---|---|---|
| TCGA-BR-8362 | STAD | 398 | 0 | 356 | 0 | 4 | 0 | 0 |
| TCGA-BR-8286 | STAD | 394 | 1 | 394 | 1 | 2 | 0 | 0 |
| TCGA-HU-A4H2 | STAD | 394 | 1 | 394 | 1 | 4 | 0 | 0 |
| TCGA-BR-A4IY | STAD | 392 | 1 | 392 | 1 | 3 | 1 | 0 |
| TCGA-BR-7196 | STAD | 390 | 1 | 348 | 0 | 4 | 1 | 0 |
| TCGA-BR-8588 | STAD | 389 | 1 | 389 | 1 | 3 | 0 | 0 |
| TCGA-D7-6817 | STAD | 389 | 1 | 389 | 1 | 4 | 0 | 1 |
| TCGA-D7-5578 | STAD | 385 | 1 | 385 | 1 | 4 | 0 | 0 |
| TCGA-CD-A4MJ | STAD | 384 | 1 | 69  | 0 | 1 | 0 | 1 |
| TCGA-BR-7851 | STAD | 378 | 1 | 378 | 1 | 3 | 0 | 0 |
| TCGA-CD-A48A | STAD | 378 | 1 | 378 | 1 | 2 | 0 | 1 |
| TCGA-D7-5577 | STAD | 376 | 1 | 376 | 0 | 4 | 0 | 0 |
| TCGA-BR-8078 | STAD | 373 | 1 | 373 | 1 | 3 | 0 | 0 |
| TCGA-CD-A4MH | STAD | 371 | 1 | 371 | 1 | 2 | 0 | 1 |
| TCGA-BR-6709 | STAD | 370 | 0 | 370 | 0 | 4 | 1 | 0 |
| TCGA-HU-8604 | STAD | 368 | 1 | 368 | 1 | 2 | 1 | 0 |
| TCGA-CG-4455 | STAD | 366 | 1 | 366 | 1 | 2 | 0 | 0 |
| TCGA-D7-5579 | STAD | 363 | 1 | 363 | 1 | 4 | 0 | 0 |
| TCGA-BR-A4QL | STAD | 352 | 1 | 352 | 1 | 4 | 0 | 0 |
| TCGA-BR-8678 | STAD | 351 | 1 | 351 | 1 | 1 | 0 | 0 |
| TCGA-BR-8060 | STAD | 348 | 0 | 348 | 0 | 3 | 0 | 0 |
| TCGA-HU-8602 | STAD | 347 | 1 | 347 | 1 | 3 | 1 | 0 |
| TCGA-CD-A489 | STAD | 344 | 0 | 277 | 0 | 2 | 0 | 0 |
| TCGA-D7-6820 | STAD | 344 | 1 | 344 | 1 | 2 | 0 | 0 |
| TCGA-BR-8690 | STAD | 325 | 1 | 325 | 1 | 4 | 1 | 0 |
| TCGA-HU-8608 | STAD | 323 | 1 | 323 | 1 | 4 | 1 | 0 |
| TCGA-D7-6818 | STAD | 321 | 1 | 278 | 0 | 4 | 0 | 1 |
| TCGA-HU-A4GX | STAD | 310 | 1 | 310 | 1 | 4 | 1 | 0 |
| TCGA-BR-8683 | STAD | 300 | 0 | 300 | 0 | 4 | 0 | 0 |
| TCGA-HU-A4H6 | STAD | 294 | 1 | 294 | 1 | 4 | 1 | 0 |
| TCGA-BR-8590 | STAD | 284 | 0 | 223 | 0 | 4 | 0 | 0 |
| TCGA-CD-A487 | STAD | 284 | 1 | 284 | 1 | 3 | 0 | 0 |
| TCGA-BR-7197 | STAD | 280 | 1 | 280 | 1 | 2 | 0 | 0 |
| TCGA-BR-6565 | STAD | 279 | 0 | 279 | 0 | 3 | 0 | 0 |
| TCGA-CG-4465 | STAD | 274 | 0 | 274 | 0 | 4 | 1 | 0 |
| TCGA-HU-A4GP | STAD | 273 | 1 | 273 | 1 | 2 | 1 | 0 |
| TCGA-HU-A4H8 | STAD | 270 | 1 | 270 | 1 | 1 | 1 | 0 |
| TCGA-BR-8687 | STAD | 250 | 0 | 250 | 0 | 4 | 0 | 0 |
| TCGA-BR-8284 | STAD | 245 | 0 | 245 | 0 | 4 | 0 | 0 |
| TCGA-CG-4437 | STAD | 245 | 1 | 245 | 1 | 2 | 0 | 0 |
| TCGA-CG-4436 | STAD | 243 | 1 | 243 | 1 | 1 | 0 | 0 |
| TCGA-BR-8297 | STAD | 225 | 1 | 225 | 1 | 4 | 0 | 0 |
| TCGA-CG-4469 | STAD | 215 | 0 | 215 | 0 | 4 | 1 | 0 |
| TCGA-CG-5717 | STAD | 212 | 0 | 120 | 0 | 2 | 1 | 0 |
| TCGA-CD-A4MG | STAD | 200 | 0 | 74  | 0 | 2 | 0 | 0 |
| TCGA-F1-6177 | STAD | 200 | 1 | 200 | 1 | 1 | 0 | 0 |
| TCGA-HU-A4GT | STAD | 198 | 1 | 198 | 1 | 2 | 1 | 0 |
| TCGA-BR-8360 | STAD | 188 | 1 | 188 | 1 | 2 | 0 | 0 |
| TCGA-HU-A4G3 | STAD | 170 | 1 | 170 | 1 | 3 | 1 | 0 |
| TCGA-FP-A4BF | STAD | 168 | 0 | 159 | 0 | 4 | 0 | 0 |
| TCGA-BR-8483 | STAD | 164 | 1 | 164 | 1 | 4 | 0 | 0 |
| TCGA-CG-4440 | STAD | 122 | 0 | 122 | 0 | 4 | 0 | 0 |
| TCGA-BR-7901 | STAD | 105 | 0 | 91  | 0 | 3 | 0 | 0 |
| TCGA-CD-A486 | STAD | 104 | 1 | 104 | 1 | 2 | 0 | 0 |
| TCGA-IN-8663 | STAD | 103 | 0 | 103 | 0 | 3 | 0 | 0 |
| TCGA-CD-5799 | STAD | 99  | 1 | 99  | 1 | 2 | 0 | 0 |
| TCGA-CG-4301 | STAD | 92  | 1 | 92  | 1 | 4 | 0 | 0 |
| TCGA-BR-8289 | STAD | 81  | 0 | 81  | 0 | 4 | 0 | 0 |
| TCGA-IP-7968 | STAD | 77  | 1 | 77  | 1 | 4 | 0 | 0 |
| TCGA-BR-A4CS | STAD | 45  | 0 | 45  | 0 | 4 | 0 | 0 |
| TCGA-BR-A4PF | STAD | 35  | 1 | 35  | 1 | 4 | 0 | 0 |
| TCGA-CG-5719 | STAD | 31  | 1 | 31  | 1 | 4 | 0 | 0 |
| TCGA-BR-A4J1 | STAD | 22  | 0 | 22  | 0 | 4 | 0 | 0 |
| TCGA-BR-8077 | STAD | 21  | 1 | 21  | 1 | 4 | 0 | 0 |
| TCGA-BR-A4J6 | STAD | 20  | 1 | 20  | 1 | 2 | 0 | 0 |
| TCGA-BR-8285 | STAD | 17  | 0 | 17  | 0 | 4 | 0 | 0 |
| TCGA-BR-A4J4 | STAD | 16  | 1 | 16  | 1 | 4 | 0 | 0 |
| TCGA-BR-8677 | STAD | 15  | 1 | 15  | 1 | 4 | 0 | 0 |
| TCGA-CD-5802 | STAD | 9   | 1 | 9   | 1 | 2 | 0 | 0 |
| TCGA-BR-8363 | STAD | 8   | 0 | 8   | 0 | 4 | 0 | 0 |

|              |      |      |   |      |   |    |   |   |
|--------------|------|------|---|------|---|----|---|---|
| TCGA-BR-8381 | STAD | 8    | 1 | 8    | 1 | 3  | 1 | 0 |
| TCGA-CD-8533 | STAD | 4    | 1 | 4    | 1 | 2  | 0 | 0 |
| TCGA-CD-A4MI | STAD | 3    | 1 | 3    | 1 | 3  | 0 | 0 |
| TCGA-HU-A4GQ | STAD | 3    | 0 | 3    | 0 | 4  | 0 | 0 |
| TCGA-BR-A4CR | STAD | 0    | 1 | 0    | 1 | 4  | 0 | 0 |
| TCGA-CG-4442 | STAD | 0    | 1 | 0    | 1 | 1  | 0 | 0 |
| TCGA-CG-4462 | STAD | 0    | 0 | 0    | 0 | 4  | 0 | 0 |
| TCGA-CG-4476 | STAD | 0    | 1 | 0    | 1 | 4  | 0 | 0 |
| TCGA-HR-A2OH | SKCM | 1825 | 1 | 1825 | 1 | 4  | 1 | 1 |
| TCGA-BF-A1Q0 | SKCM | 831  | 1 | 831  | 1 | 3  | 0 | 0 |
| TCGA-GN-A26C | SKCM | 821  | 0 | 821  | 0 | 4  | 0 | 1 |
| TCGA-EB-A4XL | SKCM | 777  | 1 | 777  | 1 | 3  | 0 | 0 |
| TCGA-FS-A1ZN | SKCM | 730  | 0 | 730  | 0 | 4  | 0 | 0 |
| TCGA-FR-A3R1 | SKCM | 685  | 1 | 685  | 1 | 3  | 0 | 0 |
| TCGA-EB-A3XC | SKCM | 650  | 1 | 650  | 1 | 3  | 0 | 0 |
| TCGA-EB-A24D | SKCM | 645  | 1 | 645  | 1 | 4  | 1 | 0 |
| TCGA-FW-A5DX | SKCM | 640  | 1 | 640  | 1 | NA | 0 | 1 |
| TCGA-EB-A24C | SKCM | 632  | 1 | 465  | 0 | 3  | 1 | 0 |
| TCGA-EB-A1NK | SKCM | 613  | 1 | 613  | 1 | 3  | 0 | 0 |
| TCGA-EB-A4OY | SKCM | 593  | 1 | 593  | 1 | 4  | 0 | 0 |
| TCGA-EB-A551 | SKCM | 590  | 1 | 590  | 1 | 4  | 0 | 0 |
| TCGA-EB-A431 | SKCM | 568  | 1 | 568  | 1 | 3  | 0 | 0 |
| TCGA-D9-A4Z6 | SKCM | 561  | 0 | 561  | 0 | 3  | 0 | 0 |
| TCGA-D9-A1X3 | SKCM | 551  | 1 | 551  | 1 | 4  | 0 | 1 |
| TCGA-EB-A51B | SKCM | 537  | 1 | 537  | 1 | 3  | 0 | 0 |
| TCGA-IH-A3EA | SKCM | 524  | 1 | 524  | 1 | 3  | 0 | 0 |
| TCGA-D9-A3Z4 | SKCM | 519  | 0 | 519  | 0 | 4  | 0 | 0 |
| TCGA-ER-A19K | SKCM | 469  | 0 | 469  | 0 | 3  | 1 | 0 |
| TCGA-EB-A6R0 | SKCM | 467  | 1 | 467  | 1 | 3  | 0 | 0 |
| TCGA-GN-A263 | SKCM | 467  | 0 | 467  | 0 | 4  | 0 | 0 |
| TCGA-EB-A5FP | SKCM | 454  | 0 | 454  | 0 | 4  | 1 | 0 |
| TCGA-EB-A4Z2 | SKCM | 441  | 1 | 441  | 1 | 4  | 0 | 0 |
| TCGA-EB-A42Y | SKCM | 440  | 1 | 440  | 1 | 3  | 0 | 0 |
| TCGA-EB-A3XD | SKCM | 430  | 1 | 430  | 1 | 3  | 0 | 0 |
| TCGA-EB-A5UM | SKCM | 414  | 1 | 414  | 1 | 3  | 0 | 0 |
| TCGA-EB-A3XB | SKCM | 408  | 1 | 408  | 1 | 3  | 0 | 0 |
| TCGA-EB-A5SE | SKCM | 401  | 0 | 401  | 0 | 2  | 0 | 0 |
| TCGA-EB-A57M | SKCM | 399  | 1 | 399  | 1 | 4  | 1 | 0 |
| TCGA-EB-A6QY | SKCM | 382  | 1 | 382  | 1 | 3  | 0 | 0 |
| TCGA-EB-A299 | SKCM | 378  | 1 | 378  | 1 | 1  | 0 | 0 |
| TCGA-EB-A5SF | SKCM | 369  | 0 | 369  | 0 | 3  | 0 | 0 |
| TCGA-FR-A2OS | SKCM | 368  | 0 | 368  | 0 | 3  | 1 | 0 |
| TCGA-EB-A6QZ | SKCM | 352  | 0 | 352  | 0 | 2  | 0 | 1 |
| TCGA-EB-A3Y7 | SKCM | 326  | 0 | 326  | 0 | 4  | 0 | 0 |
| TCGA-EB-A4P0 | SKCM | 326  | 0 | 326  | 0 | 3  | 0 | 0 |
| TCGA-EB-A41B | SKCM | 291  | 1 | 291  | 1 | 3  | 0 | 0 |
| TCGA-EB-A3XF | SKCM | 278  | 1 | 278  | 1 | 3  | 0 | 0 |
| TCGA-EB-A550 | SKCM | 264  | 0 | 264  | 0 | 3  | 0 | 0 |
| TCGA-EB-A41A | SKCM | 262  | 1 | 262  | 1 | 3  | 0 | 0 |
| TCGA-EB-A553 | SKCM | 226  | 1 | 226  | 1 | 3  | 1 | 0 |
| TCGA-D9-A4Z5 | SKCM | 218  | 1 | 218  | 1 | 3  | 0 | 1 |
| TCGA-D9-A4Z2 | SKCM | 190  | 0 | 190  | 0 | 4  | 0 | 0 |
| TCGA-EB-A3XE | SKCM | 180  | 1 | 180  | 1 | 2  | 0 | 0 |
| TCGA-GN-A269 | SKCM | 170  | 0 | 170  | 0 | 4  | 0 | 0 |
| TCGA-EB-A3Y6 | SKCM | 126  | 1 | 126  | 1 | 3  | 1 | 0 |
| TCGA-EB-A440 | SKCM | 81   | 1 | 81   | 1 | 3  | 0 | 0 |
| TCGA-GF-A2C7 | SKCM | 21   | 1 | 21   | 1 | 3  | 0 | 0 |
| TCGA-BF-A1PV | SKCM | 14   | 1 | 14   | 1 | 3  | 0 | 0 |
| TCGA-BF-A3DM | SKCM | 14   | 1 | 14   | 1 | 3  | 0 | 0 |
| TCGA-HR-A2OG | SKCM | 7    | 1 | 7    | 1 | NA | 0 | 0 |
| TCGA-EB-A430 | SKCM | 2    | 1 | 2    | 1 | 3  | 0 | 0 |
| TCGA-EB-A4IS | SKCM | 0    | 1 | 0    | 1 | 2  | 0 | 0 |
| TCGA-EJ-5519 | PRAD | 1825 | 1 | 1825 | 1 | 3  | 0 | 0 |
| TCGA-EJ-7115 | PRAD | 1825 | 1 | 1825 | 1 | 2  | 0 | 0 |
| TCGA-EJ-7123 | PRAD | 1825 | 1 | 1825 | 1 | 1  | 0 | 0 |
| TCGA-G9-6332 | PRAD | 1825 | 1 | 1180 | 0 | 2  | 0 | 0 |
| TCGA-G9-6333 | PRAD | 1825 | 1 | 1825 | 1 | 1  | 0 | 0 |
| TCGA-HC-7078 | PRAD | 1825 | 1 | 1825 | 1 | 2  | 0 | 0 |
| TCGA-HI-7168 | PRAD | 1825 | 1 | 1825 | 1 | 2  | 0 | 1 |
| TCGA-HI-7169 | PRAD | 1825 | 1 | 1825 | 1 | 2  | 0 | 0 |

|              |      |      |   |      |   |    |   |   |
|--------------|------|------|---|------|---|----|---|---|
| TCGA-HI-7170 | PRAD | 1825 | 1 | 1825 | 1 | 1  | 0 | 0 |
| TCGA-G9-6494 | PRAD | 1771 | 1 | 1771 | 1 | 3  | 0 | 0 |
| TCGA-EJ-5518 | PRAD | 1590 | 1 | 1590 | 1 | 3  | 0 | 0 |
| TCGA-EJ-5511 | PRAD | 1476 | 1 | 1476 | 1 | 2  | 0 | 0 |
| TCGA-EJ-5509 | PRAD | 1464 | 1 | 1464 | 1 | 1  | 0 | 0 |
| TCGA-EJ-5517 | PRAD | 1454 | 1 | 1454 | 1 | 1  | 0 | 0 |
| TCGA-G9-6362 | PRAD | 1443 | 1 | 1443 | 1 | 2  | 0 | 0 |
| TCGA-EJ-5516 | PRAD | 1416 | 1 | 1416 | 1 | 2  | 0 | 0 |
| TCGA-G9-6361 | PRAD | 1415 | 1 | 1415 | 1 | 2  | 0 | 0 |
| TCGA-G9-6363 | PRAD | 1378 | 1 | 1378 | 1 | 3  | 0 | 0 |
| TCGA-EJ-5501 | PRAD | 1365 | 1 | 1365 | 1 | 2  | 0 | 0 |
| TCGA-HI-7171 | PRAD | 1329 | 0 | 1329 | 0 | 2  | 0 | 1 |
| TCGA-EJ-5524 | PRAD | 1310 | 1 | 265  | 0 | 2  | 0 | 1 |
| TCGA-G9-6329 | PRAD | 1266 | 1 | 1266 | 1 | 1  | 0 | 0 |
| TCGA-HC-7213 | PRAD | 1219 | 1 | 170  | 0 | 2  | 0 | 1 |
| TCGA-G9-6369 | PRAD | 1215 | 1 | 1215 | 1 | 1  | 0 | 0 |
| TCGA-EJ-5527 | PRAD | 1209 | 1 | 1209 | 1 | 2  | 0 | 0 |
| TCGA-G9-6364 | PRAD | 1198 | 1 | 1198 | 1 | 2  | 0 | 0 |
| TCGA-EJ-5508 | PRAD | 1184 | 1 | 1184 | 1 | 2  | 0 | 0 |
| TCGA-EJ-5526 | PRAD | 1179 | 1 | 537  | 0 | 3  | 0 | 0 |
| TCGA-EJ-7782 | PRAD | 1167 | 1 | 1167 | 1 | 1  | 0 | 0 |
| TCGA-EJ-7314 | PRAD | 1150 | 1 | 1150 | 1 | 2  | 0 | 0 |
| TCGA-EJ-5510 | PRAD | 1116 | 1 | 1116 | 1 | 1  | 0 | 0 |
| TCGA-EJ-5525 | PRAD | 1115 | 1 | 546  | 0 | 1  | 0 | 0 |
| TCGA-HC-7080 | PRAD | 1106 | 1 | 894  | 0 | 1  | 0 | 0 |
| TCGA-EJ-5514 | PRAD | 1102 | 1 | 1102 | 1 | 1  | 0 | 0 |
| TCGA-CH-5751 | PRAD | 1065 | 1 | 365  | 0 | 4  | 0 | 0 |
| TCGA-EJ-7315 | PRAD | 1008 | 1 | 1008 | 1 | 2  | 0 | 0 |
| TCGA-G9-7525 | PRAD | 994  | 1 | 994  | 1 | 1  | 0 | 0 |
| TCGA-HC-7821 | PRAD | 956  | 1 | 956  | 1 | 3  | 0 | 1 |
| TCGA-CH-5752 | PRAD | 943  | 1 | 943  | 1 | 2  | 0 | 1 |
| TCGA-G9-7521 | PRAD | 942  | 1 | 942  | 1 | 3  | 0 | 0 |
| TCGA-EJ-5505 | PRAD | 922  | 1 | 922  | 1 | 1  | 0 | 0 |
| TCGA-EJ-5542 | PRAD | 884  | 1 | 884  | 1 | 2  | 0 | 0 |
| TCGA-CH-5794 | PRAD | 882  | 1 | 882  | 1 | 1  | 0 | 0 |
| TCGA-EJ-5504 | PRAD | 880  | 1 | 880  | 1 | 3  | 0 | 0 |
| TCGA-HC-7212 | PRAD | 870  | 1 | 870  | 1 | 1  | 0 | 1 |
| TCGA-FC-7708 | PRAD | 864  | 1 | 864  | 1 | 2  | 0 | 0 |
| TCGA-G9-7523 | PRAD | 857  | 1 | 857  | 1 | 2  | 0 | 0 |
| TCGA-EJ-5506 | PRAD | 827  | 1 | 827  | 1 | 3  | 0 | 0 |
| TCGA-EJ-5494 | PRAD | 826  | 1 | 826  | 1 | 2  | 0 | 0 |
| TCGA-EJ-7321 | PRAD | 824  | 1 | 824  | 1 | 2  | 0 | 0 |
| TCGA-G9-6373 | PRAD | 811  | 1 | 811  | 1 | 2  | 0 | 0 |
| TCGA-EJ-7783 | PRAD | 787  | 1 | 787  | 1 | 2  | 0 | 0 |
| TCGA-HC-7752 | PRAD | 782  | 1 | 782  | 1 | 1  | 0 | 0 |
| TCGA-EJ-7784 | PRAD | 781  | 1 | 781  | 1 | 1  | 0 | 0 |
| TCGA-EJ-7317 | PRAD | 771  | 1 | 771  | 1 | 1  | 0 | 0 |
| TCGA-EJ-7331 | PRAD | 742  | 1 | 742  | 1 | 1  | 0 | 0 |
| TCGA-EJ-5507 | PRAD | 727  | 1 | 727  | 1 | 3  | 0 | 0 |
| TCGA-EJ-7781 | PRAD | 727  | 1 | 727  | 1 | 1  | 0 | 0 |
| TCGA-HC-7740 | PRAD | 717  | 1 | 717  | 1 | 1  | 0 | 0 |
| TCGA-HC-8216 | PRAD | 682  | 1 | 682  | 1 | NA | 0 | 0 |
| TCGA-CH-5739 | PRAD | 671  | 1 | 671  | 1 | 2  | 0 | 0 |
| TCGA-EJ-7785 | PRAD | 625  | 1 | 625  | 1 | 2  | 0 | 0 |
| TCGA-J4-8198 | PRAD | 614  | 1 | 614  | 1 | 2  | 0 | 0 |
| TCGA-EJ-7797 | PRAD | 606  | 1 | 606  | 1 | 1  | 0 | 0 |
| TCGA-HC-7075 | PRAD | 601  | 1 | 601  | 1 | 1  | 0 | 0 |
| TCGA-EJ-5496 | PRAD | 595  | 1 | 595  | 1 | 1  | 0 | 0 |
| TCGA-EJ-7789 | PRAD | 552  | 1 | 552  | 1 | 2  | 0 | 0 |
| TCGA-EJ-7792 | PRAD | 526  | 1 | 526  | 1 | 1  | 0 | 0 |
| TCGA-HC-8265 | PRAD | 483  | 1 | 483  | 1 | 2  | 0 | 1 |
| TCGA-HC-7209 | PRAD | 440  | 1 | 440  | 1 | 1  | 0 | 0 |
| TCGA-EJ-7788 | PRAD | 430  | 1 | 430  | 1 | 2  | 0 | 0 |
| TCGA-CH-5743 | PRAD | 425  | 1 | 425  | 0 | 1  | 0 | 0 |
| TCGA-EJ-5497 | PRAD | 405  | 1 | 405  | 1 | 1  | 0 | 0 |
| TCGA-CH-5750 | PRAD | 396  | 1 | 396  | 1 | 1  | 0 | 0 |
| TCGA-CH-5741 | PRAD | 395  | 1 | 395  | 1 | 3  | 0 | 1 |
| TCGA-J4-8200 | PRAD | 374  | 1 | 374  | 1 | NA | 0 | 0 |
| TCGA-CH-5789 | PRAD | 304  | 1 | 304  | 1 | 2  | 0 | 0 |
| TCGA-EJ-7330 | PRAD | 191  | 1 | 191  | 1 | 2  | 0 | 0 |

|              |      |      |    |      |    |   |   |   |
|--------------|------|------|----|------|----|---|---|---|
| TCGA-H9-7775 | PRAD | 185  | 1  | 185  | 1  | 1 | 0 | 0 |
| TCGA-G9-6366 | PRAD | 101  | 1  | 101  | 1  | 2 | 0 | 0 |
| TCGA-CH-5737 | PRAD | 91   | 1  | 91   | 1  | 1 | 0 | 0 |
| TCGA-CH-5745 | PRAD | 91   | 1  | 91   | 1  | 2 | 0 | 0 |
| TCGA-CH-5792 | PRAD | 91   | 1  | 91   | 1  | 2 | 0 | 0 |
| TCGA-HC-7231 | PRAD | 72   | 1  | 72   | 1  | 1 | 0 | 0 |
| TCGA-CH-5754 | PRAD | 62   | 1  | 62   | 1  | 3 | 0 | 0 |
| TCGA-HC-7230 | PRAD | 51   | 1  | 51   | 1  | 1 | 0 | 0 |
| TCGA-HC-7744 | PRAD | 51   | 1  | 51   | 1  | 2 | 0 | 0 |
| TCGA-HC-7742 | PRAD | 45   | 1  | 45   | 1  | 2 | 0 | 0 |
| TCGA-CH-5740 | PRAD | 31   | 1  | 31   | 1  | 1 | 0 | 0 |
| TCGA-CH-5748 | PRAD | 31   | 1  | 31   | 1  | 2 | 0 | 0 |
| TCGA-CH-5753 | PRAD | 31   | 1  | 31   | 1  | 3 | 0 | 0 |
| TCGA-HC-7736 | PRAD | 22   | 1  | 22   | 1  | 1 | 0 | 0 |
| TCGA-HC-7077 | PRAD | 0    | 1  | 0    | 1  | 2 | 0 | 0 |
| TCGA-63-7021 | LUSC | NA   | NA | NA   | NA | 1 | 0 | 0 |
| TCGA-63-7023 | LUSC | NA   | NA | NA   | NA | 1 | 1 | 1 |
| TCGA-21-1082 | LUSC | 1825 | 1  | 1825 | 1  | 1 | 0 | 0 |
| TCGA-34-5231 | LUSC | 1825 | 1  | 1825 | 1  | 1 | 0 | 0 |
| TCGA-34-5232 | LUSC | 1825 | 1  | 1825 | 1  | 1 | 0 | 0 |
| TCGA-58-8391 | LUSC | 1825 | 1  | 1825 | 1  | 3 | 1 | 1 |
| TCGA-77-6843 | LUSC | 1825 | 1  | 1825 | 1  | 1 | 0 | 0 |
| TCGA-77-8130 | LUSC | 1825 | 1  | 1825 | 1  | 2 | 0 | 0 |
| TCGA-NC-A5HE | LUSC | 1825 | 1  | 1825 | 1  | 2 | 1 | 1 |
| TCGA-34-5234 | LUSC | 1715 | 1  | 1715 | 1  | 1 | 0 | 0 |
| TCGA-77-8133 | LUSC | 1640 | 0  | 1640 | 0  | 1 | 0 | 0 |
| TCGA-21-5784 | LUSC | 1268 | 1  | 1268 | 1  | 1 | 0 | 0 |
| TCGA-58-8393 | LUSC | 1058 | 1  | 1058 | 1  | 1 | 0 | 0 |
| TCGA-21-5786 | LUSC | 1032 | 1  | 817  | 0  | 1 | 0 | 0 |
| TCGA-85-8354 | LUSC | 995  | 1  | 995  | 1  | 1 | 0 | 0 |
| TCGA-21-5782 | LUSC | 962  | 0  | 962  | 0  | 1 | 0 | 0 |
| TCGA-34-5927 | LUSC | 941  | 1  | 218  | 0  | 1 | 0 | 1 |
| TCGA-58-A46N | LUSC | 910  | 1  | 630  | 0  | 1 | 0 | 1 |
| TCGA-43-6647 | LUSC | 757  | 1  | 757  | 1  | 2 | 1 | 0 |
| TCGA-34-5239 | LUSC | 707  | 1  | 707  | 1  | 3 | 0 | 0 |
| TCGA-90-A4EE | LUSC | 688  | 1  | 688  | 1  | 2 | 1 | 0 |
| TCGA-43-6770 | LUSC | 653  | 1  | 653  | 1  | 1 | 0 | 0 |
| TCGA-56-A4ZJ | LUSC | 640  | 1  | 640  | 1  | 1 | 0 | 0 |
| TCGA-94-7033 | LUSC | 640  | 1  | 640  | 1  | 1 | 1 | 0 |
| TCGA-56-A49D | LUSC | 637  | 1  | 637  | 1  | 3 | 0 | 0 |
| TCGA-90-A4ED | LUSC | 615  | 1  | 615  | 1  | 1 | 0 | 0 |
| TCGA-56-A4BW | LUSC | 585  | 1  | 585  | 1  | 2 | 0 | 0 |
| TCGA-J1-A4AH | LUSC | 581  | 1  | 581  | 1  | 1 | 1 | 0 |
| TCGA-43-5668 | LUSC | 559  | 0  | 470  | 0  | 1 | 1 | 0 |
| TCGA-56-5898 | LUSC | 555  | 1  | 555  | 1  | 1 | 0 | 0 |
| TCGA-85-A4QQ | LUSC | 553  | 1  | 553  | 1  | 1 | 0 | 0 |
| TCGA-34-5928 | LUSC | 552  | 1  | 552  | 1  | 2 | 0 | 0 |
| TCGA-56-A4BY | LUSC | 543  | 0  | 543  | 0  | 1 | 0 | 1 |
| TCGA-85-A4JB | LUSC | 539  | 1  | 539  | 1  | 2 | 0 | 0 |
| TCGA-34-5241 | LUSC | 515  | 0  | 515  | 0  | 1 | 0 | 0 |
| TCGA-56-8504 | LUSC | 510  | 1  | 510  | 1  | 1 | 0 | 0 |
| TCGA-85-8351 | LUSC | 510  | 1  | 510  | 1  | 2 | 0 | 0 |
| TCGA-96-A4JL | LUSC | 504  | 1  | 504  | 1  | 2 | 1 | 0 |
| TCGA-85-A50Z | LUSC | 493  | 1  | 462  | 0  | 1 | 0 | 0 |
| TCGA-85-A510 | LUSC | 482  | 1  | 363  | 0  | 2 | 0 | 0 |
| TCGA-56-8629 | LUSC | 481  | 1  | 481  | 1  | 1 | 0 | 0 |
| TCGA-85-A511 | LUSC | 455  | 0  | 390  | 0  | 2 | 0 | 0 |
| TCGA-68-A59J | LUSC | 448  | 1  | 448  | 1  | 1 | 0 | 0 |
| TCGA-85-8071 | LUSC | 428  | 1  | 428  | 1  | 1 | 0 | 0 |
| TCGA-46-6026 | LUSC | 423  | 1  | 423  | 1  | 2 | 1 | 1 |
| TCGA-58-8388 | LUSC | 412  | 0  | 412  | 0  | 1 | 0 | 0 |
| TCGA-68-8251 | LUSC | 406  | 1  | 406  | 1  | 1 | 1 | 0 |
| TCGA-56-A4BX | LUSC | 405  | 1  | 405  | 1  | 1 | 0 | 0 |
| TCGA-85-6561 | LUSC | 395  | 1  | 395  | 1  | 1 | 1 | 1 |
| TCGA-77-8131 | LUSC | 383  | 0  | 383  | 0  | 1 | 0 | 0 |
| TCGA-85-A53L | LUSC | 377  | 1  | 377  | 1  | 1 | 0 | 0 |
| TCGA-43-6143 | LUSC | 376  | 1  | 376  | 1  | 1 | 0 | 0 |
| TCGA-34-5240 | LUSC | 365  | 1  | 365  | 1  | 2 | 1 | 0 |
| TCGA-43-A474 | LUSC | 353  | 1  | 353  | 1  | 1 | 1 | 0 |
| TCGA-77-8140 | LUSC | 351  | 0  | 351  | 0  | 2 | 0 | 0 |

|              |      |      |   |      |   |   |   |   |
|--------------|------|------|---|------|---|---|---|---|
| TCGA-21-5787 | LUSC | 329  | 0 | 103  | 0 | 3 | 0 | 1 |
| TCGA-46-6025 | LUSC | 324  | 1 | 324  | 1 | 2 | 1 | 0 |
| TCGA-56-8625 | LUSC | 315  | 0 | 272  | 0 | 3 | 0 | 0 |
| TCGA-85-8277 | LUSC | 307  | 0 | 307  | 0 | 3 | 0 | 0 |
| TCGA-43-A475 | LUSC | 296  | 1 | 296  | 1 | 2 | 1 | 1 |
| TCGA-21-1081 | LUSC | 284  | 0 | 284  | 0 | 2 | 0 | 1 |
| TCGA-34-5236 | LUSC | 276  | 0 | 113  | 0 | 2 | 0 | 1 |
| TCGA-37-4130 | LUSC | 247  | 1 | 247  | 1 | 1 | 0 | 0 |
| TCGA-68-8250 | LUSC | 244  | 1 | 244  | 1 | 1 | 0 | 0 |
| TCGA-37-4133 | LUSC | 238  | 1 | 238  | 1 | 3 | 0 | 0 |
| TCGA-37-4132 | LUSC | 227  | 1 | 227  | 1 | 2 | 0 | 0 |
| TCGA-68-7757 | LUSC | 211  | 1 | 211  | 1 | 1 | 0 | 0 |
| TCGA-96-8170 | LUSC | 211  | 1 | 211  | 1 | 1 | 0 | 0 |
| TCGA-37-4135 | LUSC | 207  | 1 | 207  | 1 | 1 | 0 | 0 |
| TCGA-37-4129 | LUSC | 200  | 1 | 200  | 1 | 1 | 0 | 0 |
| TCGA-43-6771 | LUSC | 166  | 0 | 154  | 0 | 1 | 0 | 0 |
| TCGA-92-8063 | LUSC | 122  | 1 | 122  | 1 | 3 | 1 | 1 |
| TCGA-37-3783 | LUSC | 120  | 1 | 120  | 1 | 4 | 0 | 0 |
| TCGA-43-6773 | LUSC | 116  | 0 | 116  | 0 | 2 | 0 | 0 |
| TCGA-37-5819 | LUSC | 103  | 1 | 103  | 1 | 3 | 0 | 0 |
| TCGA-43-8118 | LUSC | 89   | 0 | 89   | 0 | 1 | 1 | 0 |
| TCGA-98-8020 | LUSC | 84   | 0 | 84   | 0 | 3 | 0 | 0 |
| TCGA-92-8065 | LUSC | 70   | 1 | 70   | 1 | 2 | 0 | 0 |
| TCGA-56-6545 | LUSC | 62   | 1 | 62   | 1 | 1 | 0 | 0 |
| TCGA-85-8288 | LUSC | 54   | 1 | 54   | 1 | 1 | 0 | 0 |
| TCGA-56-8624 | LUSC | 36   | 1 | 36   | 1 | 2 | 0 | 0 |
| TCGA-34-7107 | LUSC | 34   | 0 | 34   | 0 | 1 | 0 | 0 |
| TCGA-56-6546 | LUSC | 19   | 0 | 19   | 0 | 1 | 0 | 0 |
| TCGA-37-4141 | LUSC | 12   | 1 | 12   | 1 | 1 | 0 | 0 |
| TCGA-56-5897 | LUSC | 3    | 1 | 3    | 1 | 1 | 0 | 0 |
| TCGA-58-8386 | LUSC | 1    | 0 | 1    | 0 | 3 | 0 | 0 |
| TCGA-46-3769 | LUSC | 0    | 1 | 0    | 1 | 3 | 0 | 0 |
| TCGA-38-4625 | LUAD | 1825 | 1 | 1825 | 1 | 1 | 0 | 0 |
| TCGA-38-4626 | LUAD | 1825 | 1 | 1825 | 1 | 1 | 0 | 0 |
| TCGA-62-8399 | LUAD | 1825 | 1 | 1825 | 1 | 3 | 0 | 0 |
| TCGA-62-A46U | LUAD | 1825 | 1 | 1825 | 1 | 2 | 1 | 0 |
| TCGA-64-5774 | LUAD | 1825 | 1 | 246  | 0 | 1 | 0 | 1 |
| TCGA-64-1679 | LUAD | 1686 | 1 | 1686 | 1 | 2 | 1 | 0 |
| TCGA-62-A46S | LUAD | 1653 | 0 | 1653 | 0 | 1 | 0 | 0 |
| TCGA-64-5781 | LUAD | 1559 | 1 | 96   | 0 | 1 | 1 | 0 |
| TCGA-62-8402 | LUAD | 1498 | 0 | 772  | 0 | 3 | 0 | 1 |
| TCGA-38-4628 | LUAD | 1492 | 0 | 1083 | 0 | 2 | 0 | 0 |
| TCGA-62-A46O | LUAD | 1454 | 0 | 1454 | 0 | 1 | 0 | 0 |
| TCGA-05-4389 | LUAD | 1369 | 1 | 1369 | 1 | 1 | 0 | 0 |
| TCGA-38-4632 | LUAD | 1357 | 0 | 680  | 0 | 3 | 0 | 0 |
| TCGA-44-2655 | LUAD | 1324 | 1 | 1009 | 0 | 1 | 0 | 0 |
| TCGA-64-5778 | LUAD | 1305 | 1 | 1168 | 0 | 1 | 1 | 0 |
| TCGA-62-8397 | LUAD | 1289 | 1 | 1289 | 1 | 2 | 0 | 0 |
| TCGA-62-8395 | LUAD | 1216 | 1 | 395  | 0 | 2 | 0 | 0 |
| TCGA-62-A470 | LUAD | 1194 | 0 | 1194 | 0 | 1 | 0 | 0 |
| TCGA-38-4627 | LUAD | 1147 | 0 | 1147 | 0 | 1 | 0 | 0 |
| TCGA-05-4390 | LUAD | 1126 | 1 | 395  | 0 | 1 | 1 | 0 |
| TCGA-38-4630 | LUAD | 1073 | 0 | 524  | 0 | 1 | 0 | 1 |
| TCGA-05-4424 | LUAD | 913  | 1 | 153  | 0 | 2 | 0 | 1 |
| TCGA-05-4420 | LUAD | 912  | 1 | 912  | 1 | 1 | 0 | 0 |
| TCGA-05-5425 | LUAD | 882  | 1 | 486  | 0 | 2 | 1 | 1 |
| TCGA-38-4629 | LUAD | 864  | 0 | 379  | 0 | 2 | 0 | 0 |
| TCGA-64-5779 | LUAD | 864  | 1 | 795  | 0 | 3 | 1 | 1 |
| TCGA-05-4427 | LUAD | 791  | 1 | 791  | 1 | 2 | 1 | 0 |
| TCGA-05-4430 | LUAD | 761  | 1 | 761  | 1 | 1 | 0 | 0 |
| TCGA-05-4432 | LUAD | 761  | 1 | 761  | 1 | 2 | 1 | 0 |
| TCGA-05-4397 | LUAD | 731  | 0 | 731  | 0 | 2 | 0 | 0 |
| TCGA-05-4433 | LUAD | 730  | 1 | 730  | 1 | 1 | 0 | 0 |
| TCGA-69-7763 | LUAD | 690  | 1 | 690  | 1 | 1 | 0 | 0 |
| TCGA-05-5428 | LUAD | 670  | 1 | 670  | 1 | 1 | 1 | 1 |
| TCGA-05-4425 | LUAD | 669  | 1 | 669  | 1 | 2 | 1 | 0 |
| TCGA-05-4405 | LUAD | 610  | 1 | 610  | 1 | 1 | 0 | 0 |
| TCGA-67-3771 | LUAD | 610  | 1 | 610  | 1 | 1 | 0 | 0 |
| TCGA-05-4382 | LUAD | 607  | 1 | 607  | 1 | 1 | 0 | 1 |
| TCGA-62-A46P | LUAD | 594  | 0 | 594  | 0 | 1 | 0 | 0 |

|              |      |      |   |      |   |    |   |   |
|--------------|------|------|---|------|---|----|---|---|
| TCGA-05-4403 | LUAD | 578  | 1 | 578  | 1 | 1  | 0 | 0 |
| TCGA-05-4434 | LUAD | 457  | 0 | 457  | 0 | 4  | 0 | 0 |
| TCGA-05-5420 | LUAD | 457  | 1 | 245  | 0 | 3  | 0 | 0 |
| TCGA-05-4417 | LUAD | 455  | 1 | 455  | 1 | 1  | 0 | 0 |
| TCGA-38-6178 | LUAD | 448  | 1 | 448  | 1 | 3  | 1 | 0 |
| TCGA-62-8398 | LUAD | 444  | 0 | 444  | 0 | 3  | 1 | 0 |
| TCGA-67-3773 | LUAD | 427  | 1 | 427  | 1 | 1  | 0 | 0 |
| TCGA-05-4384 | LUAD | 426  | 1 | 183  | 0 | 3  | 1 | 1 |
| TCGA-67-6217 | LUAD | 422  | 1 | 296  | 0 | 2  | 0 | 0 |
| TCGA-62-A46Y | LUAD | 414  | 0 | 414  | 0 | 3  | 1 | 1 |
| TCGA-69-7764 | LUAD | 414  | 1 | 414  | 1 | 1  | 0 | 0 |
| TCGA-67-3774 | LUAD | 385  | 1 | 385  | 1 | 1  | 0 | 0 |
| TCGA-05-4422 | LUAD | 365  | 1 | 365  | 1 | 1  | 0 | 0 |
| TCGA-38-4631 | LUAD | 354  | 0 | 354  | 0 | 1  | 0 | 1 |
| TCGA-05-4396 | LUAD | 303  | 0 | 303  | 0 | 4  | 0 | 0 |
| TCGA-05-5429 | LUAD | 275  | 0 | 275  | 0 | 4  | 0 | 0 |
| TCGA-05-4418 | LUAD | 274  | 0 | 274  | 0 | 4  | 0 | 0 |
| TCGA-35-5375 | LUAD | 264  | 1 | 264  | 1 | 3  | 0 | 0 |
| TCGA-05-4402 | LUAD | 244  | 0 | 244  | 0 | 2  | 1 | 0 |
| TCGA-69-7973 | LUAD | 230  | 1 | 230  | 1 | 1  | 1 | 0 |
| TCGA-35-4122 | LUAD | 225  | 1 | 225  | 1 | 1  | 0 | 0 |
| TCGA-69-A59K | LUAD | 214  | 1 | 214  | 1 | 2  | 1 | 0 |
| TCGA-69-7760 | LUAD | 202  | 1 | 202  | 1 | 2  | 1 | 0 |
| TCGA-69-7974 | LUAD | 184  | 1 | 184  | 1 | 3  | 1 | 1 |
| TCGA-35-4123 | LUAD | 182  | 1 | 182  | 1 | 1  | 0 | 0 |
| TCGA-69-7765 | LUAD | 165  | 1 | 165  | 1 | 3  | 1 | 0 |
| TCGA-05-5423 | LUAD | 151  | 1 | 151  | 1 | 2  | 0 | 0 |
| TCGA-67-6216 | LUAD | 141  | 1 | 141  | 1 | 1  | 0 | 0 |
| TCGA-62-8394 | LUAD | 139  | 0 | 139  | 0 | 4  | 1 | 0 |
| TCGA-05-4250 | LUAD | 121  | 0 | 121  | 0 | 3  | 0 | 0 |
| TCGA-05-4415 | LUAD | 91   | 0 | 60   | 0 | 4  | 0 | 0 |
| TCGA-69-7979 | LUAD | 89   | 1 | 89   | 1 | 1  | 0 | 0 |
| TCGA-05-5715 | LUAD | 62   | 1 | 62   | 1 | 1  | 0 | 0 |
| TCGA-64-5775 | LUAD | 62   | 0 | 62   | 0 | 3  | 0 | 0 |
| TCGA-67-3770 | LUAD | 31   | 1 | 31   | 1 | 1  | 0 | 0 |
| TCGA-35-3615 | LUAD | 14   | 1 | 14   | 1 | 1  | 0 | 0 |
| TCGA-05-4395 | LUAD | 0    | 0 | 0    | 0 | 4  | 0 | 0 |
| TCGA-05-4410 | LUAD | 0    | 1 | 0    | 1 | 1  | 0 | 0 |
| TCGA-67-4679 | LUAD | 0    | 1 | 0    | 1 | 2  | 0 | 0 |
| TCGA-CS-5390 | LGG  | 1825 | 1 | 1825 | 1 | NA | 1 | 1 |
| TCGA-DB-5270 | LGG  | 1825 | 1 | 1825 | 1 | NA | 1 | 1 |
| TCGA-DB-5273 | LGG  | 1825 | 1 | 1825 | 1 | NA | 1 | 1 |
| TCGA-DB-5274 | LGG  | 1825 | 1 | 1825 | 1 | NA | 1 | 1 |
| TCGA-DB-5276 | LGG  | 1825 | 1 | 1825 | 1 | NA | 1 | 1 |
| TCGA-DB-5281 | LGG  | 1825 | 1 | 1825 | 1 | NA | 1 | 1 |
| TCGA-DU-5870 | LGG  | 1825 | 1 | 1825 | 1 | NA | 0 | 1 |
| TCGA-DU-6396 | LGG  | 1825 | 1 | 106  | 0 | NA | 1 | 1 |
| TCGA-DU-6399 | LGG  | 1825 | 1 | 1629 | 0 | NA | 0 | 1 |
| TCGA-DU-6401 | LGG  | 1825 | 1 | 1825 | 1 | NA | 1 | 1 |
| TCGA-DU-6407 | LGG  | 1825 | 1 | 1825 | 1 | NA | 0 | 1 |
| TCGA-DU-7007 | LGG  | 1825 | 1 | 1825 | 1 | NA | 0 | 0 |
| TCGA-DU-7008 | LGG  | 1825 | 1 | 330  | 0 | NA | 0 | 1 |
| TCGA-DU-7009 | LGG  | 1825 | 1 | 1825 | 1 | NA | 0 | 1 |
| TCGA-DU-7294 | LGG  | 1825 | 1 | 1825 | 1 | NA | 0 | 0 |
| TCGA-DU-7300 | LGG  | 1825 | 1 | 317  | 0 | NA | 0 | 1 |
| TCGA-DU-7302 | LGG  | 1825 | 1 | 1374 | 0 | NA | 0 | 0 |
| TCGA-E1-5303 | LGG  | 1825 | 1 | 156  | 0 | NA | 1 | 1 |
| TCGA-E1-5305 | LGG  | 1825 | 1 | 1604 | 0 | NA | 1 | 1 |
| TCGA-E1-5311 | LGG  | 1825 | 1 | 1825 | 1 | NA | 1 | 1 |
| TCGA-E1-5318 | LGG  | 1825 | 1 | 362  | 0 | NA | 1 | 1 |
| TCGA-E1-5319 | LGG  | 1825 | 1 | 923  | 0 | NA | 1 | 1 |
| TCGA-E1-5322 | LGG  | 1825 | 1 | 1085 | 0 | NA | 1 | 1 |
| TCGA-HT-7480 | LGG  | 1825 | 1 | 1825 | 1 | NA | 1 | 1 |
| TCGA-HT-7604 | LGG  | 1825 | 1 | 1825 | 1 | NA | 0 | 1 |
| TCGA-E1-5307 | LGG  | 1762 | 0 | 1452 | 0 | NA | 1 | 1 |
| TCGA-HT-7611 | LGG  | 1752 | 1 | 1752 | 1 | NA | 0 | 0 |
| TCGA-DU-6393 | LGG  | 1585 | 0 | 1585 | 0 | NA | 1 | 1 |
| TCGA-DB-5277 | LGG  | 1547 | 0 | 1156 | 0 | NA | 1 | 1 |
| TCGA-HT-7858 | LGG  | 1540 | 1 | 1540 | 1 | NA | 0 | 1 |
| TCGA-E1-5302 | LGG  | 1525 | 0 | 1242 | 0 | NA | 1 | 1 |

|              |     |      |   |      |   |    |   |   |
|--------------|-----|------|---|------|---|----|---|---|
| TCGA-DU-6395 | LGG | 1491 | 0 | 1197 | 0 | NA | 1 | 1 |
| TCGA-DB-5275 | LGG | 1458 | 1 | 1458 | 1 | NA | 1 | 1 |
| TCGA-FG-5962 | LGG | 1453 | 1 | 1453 | 1 | NA | 1 | 1 |
| TCGA-DU-6397 | LGG | 1401 | 0 | 837  | 0 | NA | 1 | 1 |
| TCGA-HT-7681 | LGG | 1359 | 1 | 1359 | 1 | NA | 0 | 0 |
| TCGA-DB-5279 | LGG | 1354 | 1 | 695  | 0 | NA | 0 | 1 |
| TCGA-DU-7299 | LGG | 1339 | 0 | 675  | 0 | NA | 0 | 1 |
| TCGA-CS-4942 | LGG | 1335 | 0 | 1184 | 0 | NA | 1 | 1 |
| TCGA-IK-8125 | LGG | 1301 | 1 | 1301 | 1 | NA | 1 | 1 |
| TCGA-HT-7686 | LGG | 1300 | 1 | 1300 | 1 | NA | 1 | 1 |
| TCGA-DU-7306 | LGG | 1277 | 1 | 1250 | 0 | NA | 1 | 1 |
| TCGA-E1-5304 | LGG | 1251 | 0 | 903  | 0 | NA | 1 | 1 |
| TCGA-CS-5393 | LGG | 1222 | 1 | 1222 | 1 | NA | 1 | 1 |
| TCGA-HW-7491 | LGG | 1222 | 1 | 1222 | 1 | NA | 1 | 0 |
| TCGA-HT-7470 | LGG | 1220 | 0 | 1220 | 0 | NA | 1 | 1 |
| TCGA-FG-7637 | LGG | 1219 | 1 | 1219 | 1 | NA | 0 | 0 |
| TCGA-HT-7854 | LGG | 1201 | 1 | 1147 | 0 | NA | 0 | 1 |
| TCGA-HT-8018 | LGG | 1152 | 0 | 1152 | 0 | NA | 0 | 1 |
| TCGA-HT-7874 | LGG | 1130 | 1 | 1130 | 1 | NA | 1 | 1 |
| TCGA-FG-5965 | LGG | 1120 | 0 | 715  | 0 | NA | 1 | 1 |
| TCGA-DB-5280 | LGG | 1112 | 1 | 1112 | 1 | NA | 0 | 0 |
| TCGA-FG-5964 | LGG | 1045 | 1 | 1045 | 1 | NA | 0 | 1 |
| TCGA-FG-8191 | LGG | 992  | 1 | 992  | 1 | NA | 1 | 1 |
| TCGA-DH-5141 | LGG | 968  | 1 | 968  | 1 | NA | 1 | 1 |
| TCGA-HT-7688 | LGG | 964  | 1 | 964  | 1 | NA | 1 | 1 |
| TCGA-DU-7018 | LGG | 933  | 0 | 338  | 0 | NA | 0 | 0 |
| TCGA-DH-5142 | LGG | 922  | 1 | 922  | 1 | NA | 1 | 1 |
| TCGA-DB-A4XB | LGG | 919  | 1 | 919  | 1 | NA | 1 | 1 |
| TCGA-DU-7019 | LGG | 800  | 1 | 800  | 1 | NA | 1 | 1 |
| TCGA-DU-7301 | LGG | 788  | 0 | 366  | 0 | NA | 0 | 1 |
| TCGA-FG-6690 | LGG | 760  | 1 | 760  | 1 | NA | 0 | 1 |
| TCGA-CS-6188 | LGG | 725  | 1 | 647  | 0 | NA | 0 | 1 |
| TCGA-DU-8161 | LGG | 722  | 0 | 111  | 0 | NA | 1 | 1 |
| TCGA-HT-7873 | LGG | 718  | 1 | 718  | 1 | NA | 0 | 1 |
| TCGA-DU-7304 | LGG | 709  | 0 | 309  | 0 | NA | 0 | 1 |
| TCGA-HT-7603 | LGG | 705  | 1 | 705  | 1 | NA | 0 | 1 |
| TCGA-FG-7638 | LGG | 686  | 1 | 407  | 0 | NA | 1 | 1 |
| TCGA-DU-6394 | LGG | 682  | 0 | 353  | 0 | NA | 1 | 1 |
| TCGA-HT-7608 | LGG | 671  | 1 | 671  | 1 | NA | 0 | 0 |
| TCGA-HW-8319 | LGG | 660  | 1 | 660  | 1 | NA | 1 | 1 |
| TCGA-DU-8164 | LGG | 651  | 1 | 651  | 1 | NA | 1 | 0 |
| TCGA-CS-5395 | LGG | 639  | 0 | 287  | 0 | NA | 1 | 1 |
| TCGA-DU-8163 | LGG | 629  | 1 | 509  | 0 | NA | 1 | 1 |
| TCGA-FG-7643 | LGG | 611  | 1 | 254  | 0 | NA | 0 | 0 |
| TCGA-FG-8187 | LGG | 611  | 1 | 611  | 1 | NA | 0 | 0 |
| TCGA-DH-5140 | LGG | 607  | 0 | 607  | 0 | NA | 1 | 1 |
| TCGA-DU-6405 | LGG | 605  | 0 | 486  | 0 | NA | 1 | 1 |
| TCGA-HW-7487 | LGG | 605  | 1 | 605  | 1 | NA | 1 | 0 |
| TCGA-HW-8321 | LGG | 596  | 1 | 596  | 1 | NA | 1 | 1 |
| TCGA-HT-7855 | LGG | 585  | 1 | 585  | 1 | NA | 1 | 1 |
| TCGA-HW-7490 | LGG | 585  | 1 | 585  | 1 | NA | 0 | 0 |
| TCGA-DU-8165 | LGG | 582  | 1 | 582  | 1 | NA | 1 | 1 |
| TCGA-IK-7675 | LGG | 578  | 0 | 123  | 0 | NA | 1 | 1 |
| TCGA-DU-5871 | LGG | 576  | 1 | 576  | 1 | NA | 0 | 1 |
| TCGA-DB-A4XA | LGG | 573  | 1 | 573  | 1 | NA | 0 | 1 |
| TCGA-FG-6688 | LGG | 571  | 1 | 405  | 0 | NA | 1 | 1 |
| TCGA-FG-6692 | LGG | 561  | 0 | 561  | 0 | NA | 1 | 1 |
| TCGA-FG-A4MW | LGG | 559  | 0 | 226  | 0 | NA | 1 | 1 |
| TCGA-CS-4943 | LGG | 552  | 1 | 552  | 1 | NA | 1 | 0 |
| TCGA-DU-5847 | LGG | 548  | 1 | 548  | 1 | NA | 1 | 1 |
| TCGA-CS-6290 | LGG | 546  | 1 | 546  | 1 | NA | 1 | 1 |
| TCGA-FG-7636 | LGG | 544  | 1 | 544  | 1 | NA | 1 | 1 |
| TCGA-HW-8322 | LGG | 542  | 1 | 542  | 1 | NA | 1 | 0 |
| TCGA-CS-6186 | LGG | 538  | 0 | 188  | 0 | NA | 1 | 1 |
| TCGA-HT-7693 | LGG | 533  | 1 | 533  | 1 | NA | 0 | 1 |
| TCGA-DU-5872 | LGG | 532  | 1 | 265  | 0 | NA | 1 | 1 |
| TCGA-DU-5851 | LGG | 531  | 1 | 531  | 1 | NA | 1 | 1 |
| TCGA-HT-7475 | LGG | 530  | 1 | 530  | 1 | NA | 1 | 1 |
| TCGA-HT-7606 | LGG | 526  | 1 | 526  | 1 | NA | 1 | 1 |
| TCGA-DU-6406 | LGG | 512  | 0 | 512  | 0 | NA | 1 | 1 |

|              |      |      |   |      |   |    |   |   |
|--------------|------|------|---|------|---|----|---|---|
| TCGA-HT-7473 | LGG  | 503  | 1 | 503  | 1 | NA | 0 | 1 |
| TCGA-HT-7677 | LGG  | 494  | 1 | 494  | 1 | NA | 1 | 1 |
| TCGA-HT-8011 | LGG  | 494  | 1 | 278  | 0 | NA | 1 | 1 |
| TCGA-FG-8186 | LGG  | 487  | 1 | 487  | 1 | NA | 0 | 1 |
| TCGA-HT-8564 | LGG  | 478  | 1 | 120  | 0 | NA | 1 | 1 |
| TCGA-DU-8167 | LGG  | 471  | 1 | 471  | 1 | NA | 0 | 1 |
| TCGA-FG-7634 | LGG  | 467  | 1 | 467  | 1 | NA | 0 | 0 |
| TCGA-DU-5874 | LGG  | 461  | 1 | 461  | 1 | NA | 1 | 0 |
| TCGA-FG-8188 | LGG  | 455  | 1 | 384  | 0 | NA | 0 | 1 |
| TCGA-HT-7689 | LGG  | 455  | 1 | 455  | 1 | NA | 1 | 1 |
| TCGA-FG-6689 | LGG  | 454  | 1 | 119  | 0 | NA | 1 | 1 |
| TCGA-DU-5849 | LGG  | 443  | 1 | 443  | 1 | NA | 1 | 0 |
| TCGA-HT-7695 | LGG  | 442  | 1 | 442  | 1 | NA | 1 | 1 |
| TCGA-DH-5143 | LGG  | 438  | 1 | 438  | 1 | NA | 1 | 1 |
| TCGA-EZ-7264 | LGG  | 436  | 1 | 436  | 1 | NA | 0 | 0 |
| TCGA-HT-7620 | LGG  | 434  | 1 | 280  | 0 | NA | 1 | 1 |
| TCGA-DU-8168 | LGG  | 431  | 1 | 431  | 1 | NA | 1 | 1 |
| TCGA-HT-8110 | LGG  | 419  | 1 | 419  | 1 | NA | 0 | 1 |
| TCGA-DU-5853 | LGG  | 407  | 1 | 407  | 1 | NA | 1 | 1 |
| TCGA-CS-6665 | LGG  | 378  | 1 | 378  | 1 | NA | 0 | 1 |
| TCGA-HT-8104 | LGG  | 372  | 1 | 372  | 1 | NA | 0 | 1 |
| TCGA-DU-6403 | LGG  | 354  | 0 | 354  | 0 | NA | 1 | 1 |
| TCGA-HT-7469 | LGG  | 351  | 0 | 92   | 0 | NA | 1 | 1 |
| TCGA-DU-7006 | LGG  | 349  | 0 | 349  | 0 | NA | 0 | 1 |
| TCGA-HT-7884 | LGG  | 343  | 1 | 343  | 1 | NA | 1 | 1 |
| TCGA-CS-4944 | LGG  | 323  | 1 | 323  | 1 | NA | 0 | 1 |
| TCGA-CS-5396 | LGG  | 303  | 1 | 303  | 1 | NA | 1 | 1 |
| TCGA-DU-7013 | LGG  | 269  | 0 | 187  | 0 | NA | 1 | 1 |
| TCGA-DU-5854 | LGG  | 257  | 1 | 202  | 0 | NA | 0 | 1 |
| TCGA-HW-7489 | LGG  | 253  | 1 | 253  | 1 | NA | 0 | 0 |
| TCGA-CS-6668 | LGG  | 244  | 1 | 244  | 1 | NA | 0 | 0 |
| TCGA-DH-5144 | LGG  | 244  | 1 | 244  | 1 | NA | 0 | 1 |
| TCGA-DU-6410 | LGG  | 242  | 1 | 242  | 1 | NA | 1 | 0 |
| TCGA-DU-7292 | LGG  | 242  | 0 | 91   | 0 | NA | 0 | 1 |
| TCGA-CS-4941 | LGG  | 234  | 0 | 9    | 0 | NA | 1 | 1 |
| TCGA-DU-6402 | LGG  | 214  | 0 | 103  | 0 | NA | 1 | 1 |
| TCGA-HT-7694 | LGG  | 210  | 1 | 210  | 1 | NA | 0 | 1 |
| TCGA-DU-5855 | LGG  | 207  | 1 | 207  | 1 | NA | 1 | 1 |
| TCGA-DU-5852 | LGG  | 205  | 0 | 24   | 0 | NA | 1 | 1 |
| TCGA-HT-7468 | LGG  | 203  | 1 | 203  | 1 | NA | 1 | 0 |
| TCGA-CS-6670 | LGG  | 201  | 1 | 201  | 1 | NA | 1 | 1 |
| TCGA-HT-7684 | LGG  | 184  | 1 | 184  | 1 | NA | 0 | 0 |
| TCGA-HT-8109 | LGG  | 169  | 1 | 169  | 1 | NA | 0 | 1 |
| TCGA-DU-8158 | LGG  | 155  | 0 | 155  | 0 | NA | 1 | 1 |
| TCGA-HT-7601 | LGG  | 153  | 1 | 153  | 1 | NA | 1 | 1 |
| TCGA-CS-4938 | LGG  | 143  | 1 | 143  | 1 | NA | 0 | 0 |
| TCGA-HT-7605 | LGG  | 139  | 1 | 139  | 1 | NA | 0 | 0 |
| TCGA-HW-7495 | LGG  | 131  | 1 | 131  | 1 | NA | 0 | 0 |
| TCGA-HT-7474 | LGG  | 114  | 1 | 114  | 1 | NA | 0 | 0 |
| TCGA-HT-7882 | LGG  | 113  | 0 | 113  | 0 | NA | 0 | 0 |
| TCGA-HT-7879 | LGG  | 112  | 1 | 112  | 1 | NA | 1 | 1 |
| TCGA-HT-7607 | LGG  | 96   | 0 | 96   | 0 | NA | 0 | 0 |
| TCGA-HT-7692 | LGG  | 90   | 1 | 90   | 1 | NA | 0 | 1 |
| TCGA-DU-7309 | LGG  | 84   | 1 | 84   | 1 | NA | 0 | 1 |
| TCGA-HT-8108 | LGG  | 76   | 1 | 76   | 1 | NA | 0 | 0 |
| TCGA-HT-8010 | LGG  | 50   | 1 | 50   | 1 | NA | 0 | 0 |
| TCGA-DU-6400 | LGG  | 37   | 0 | 37   | 0 | NA | 0 | 0 |
| TCGA-HT-7860 | LGG  | 15   | 1 | 15   | 1 | NA | 0 | 0 |
| TCGA-HT-7616 | LGG  | 7    | 0 | 7    | 0 | NA | 0 | 0 |
| TCGA-HT-7471 | LGG  | 4    | 1 | 4    | 1 | NA | 0 | 0 |
| TCGA-CS-5394 | LGG  | 3    | 1 | 3    | 1 | NA | 0 | 0 |
| TCGA-HT-7467 | LGG  | 3    | 1 | 3    | 1 | NA | 0 | 0 |
| TCGA-HT-7687 | LGG  | 3    | 1 | 3    | 1 | NA | 0 | 0 |
| TCGA-HT-7690 | LGG  | 3    | 1 | 3    | 1 | NA | 0 | 0 |
| TCGA-HT-7472 | LGG  | 1    | 1 | 1    | 1 | NA | 0 | 0 |
| TCGA-A3-3357 | KIRC | 1825 | 1 | 1825 | 1 | 1  | 0 | 0 |
| TCGA-A3-3367 | KIRC | 1825 | 1 | 1825 | 1 | 1  | 0 | 0 |
| TCGA-AK-3427 | KIRC | 1825 | 1 | 1825 | 1 | 1  | 0 | 0 |
| TCGA-B0-4945 | KIRC | 1825 | 1 | 1825 | 1 | 1  | 0 | 0 |
| TCGA-BP-4760 | KIRC | 1825 | 1 | 1457 | 0 | 1  | 0 | 0 |



|              |      |      |   |      |   |    |   |   |
|--------------|------|------|---|------|---|----|---|---|
| TCGA-BP-4964 | KIRC | 1825 | 1 | 1825 | 1 | 1  | 0 | 0 |
| TCGA-BP-5180 | KIRC | 1825 | 1 | 1825 | 1 | 1  | 0 | 0 |
| TCGA-B0-4842 | KIRC | 1724 | 0 | 250  | 0 | 2  | 0 | 0 |
| TCGA-A3-3376 | KIRC | 1696 | 0 | 1696 | 0 | 1  | 0 | 0 |
| TCGA-A3-3373 | KIRC | 1621 | 1 | 1621 | 1 | 1  | 0 | 0 |
| TCGA-B0-5098 | KIRC | 1584 | 0 | 1584 | 0 | 1  | 0 | 0 |
| TCGA-A3-3320 | KIRC | 1508 | 1 | 1508 | 1 | 1  | 0 | 0 |
| TCGA-A3-3316 | KIRC | 1493 | 1 | 1493 | 1 | 1  | 0 | 0 |
| TCGA-A3-3317 | KIRC | 1491 | 1 | 560  | 0 | 1  | 0 | 0 |
| TCGA-A3-3322 | KIRC | 1478 | 1 | 1478 | 1 | 1  | 0 | 0 |
| TCGA-AK-3444 | KIRC | 1471 | 1 | 1471 | 1 | 1  | 0 | 0 |
| TCGA-AK-3443 | KIRC | 1423 | 1 | 1423 | 1 | 1  | 0 | 0 |
| TCGA-AK-3453 | KIRC | 1397 | 1 | 1397 | 1 | 1  | 1 | 0 |
| TCGA-B0-5077 | KIRC | 1317 | 0 | 1317 | 0 | 1  | 0 | 0 |
| TCGA-A3-3374 | KIRC | 1314 | 1 | 1314 | 1 | 1  | 0 | 0 |
| TCGA-AS-3777 | KIRC | 1238 | 1 | 1238 | 1 | 1  | 0 | 0 |
| TCGA-AK-3447 | KIRC | 1217 | 1 | 1217 | 1 | 1  | 0 | 0 |
| TCGA-A3-3311 | KIRC | 1191 | 0 | 1191 | 0 | 1  | 0 | 0 |
| TCGA-A3-3326 | KIRC | 1137 | 1 | 1137 | 1 | 1  | 0 | 0 |
| TCGA-A3-3319 | KIRC | 1130 | 1 | 1130 | 1 | 1  | 0 | 0 |
| TCGA-A3-3323 | KIRC | 1106 | 1 | 1106 | 1 | 1  | 0 | 0 |
| TCGA-B2-3924 | KIRC | 1092 | 1 | 1092 | 1 | 1  | 0 | 0 |
| TCGA-B0-5083 | KIRC | 1045 | 0 | 1045 | 0 | 1  | 0 | 0 |
| TCGA-B0-4827 | KIRC | 885  | 0 | 668  | 0 | 2  | 0 | 1 |
| TCGA-A3-3365 | KIRC | 873  | 1 | 873  | 1 | 1  | 0 | 0 |
| TCGA-A3-3383 | KIRC | 861  | 1 | 861  | 1 | 1  | 0 | 0 |
| TCGA-B8-5163 | KIRC | 822  | 1 | 822  | 1 | 2  | 0 | 0 |
| TCGA-B0-5115 | KIRC | 797  | 1 | 75   | 0 | 2  | 1 | 0 |
| TCGA-B0-5085 | KIRC | 770  | 0 | 770  | 0 | 2  | 0 | 0 |
| TCGA-B8-5165 | KIRC | 737  | 1 | 737  | 1 | 1  | 0 | 0 |
| TCGA-A3-3313 | KIRC | 735  | 0 | 735  | 0 | 1  | 0 | 0 |
| TCGA-A3-3372 | KIRC | 735  | 1 | 735  | 1 | 2  | 0 | 0 |
| TCGA-BP-5192 | KIRC | 714  | 1 | 714  | 1 | 1  | 0 | 0 |
| TCGA-AK-3455 | KIRC | 683  | 0 | 683  | 0 | 2  | 0 | 0 |
| TCGA-B0-5097 | KIRC | 665  | 1 | 359  | 0 | 2  | 0 | 1 |
| TCGA-B8-5158 | KIRC | 636  | 1 | 636  | 1 | 3  | 0 | 0 |
| TCGA-A3-3382 | KIRC | 574  | 1 | 514  | 0 | 1  | 0 | 0 |
| TCGA-A3-3380 | KIRC | 567  | 1 | 567  | 1 | 1  | 0 | 0 |
| TCGA-B0-5088 | KIRC | 563  | 0 | 563  | 0 | 1  | 0 | 0 |
| TCGA-EU-5904 | KIRC | 551  | 1 | 551  | 1 | 1  | 0 | 0 |
| TCGA-B8-5545 | KIRC | 522  | 1 | 522  | 1 | 1  | 0 | 0 |
| TCGA-B8-4146 | KIRC | 511  | 1 | 511  | 1 | 1  | 0 | 0 |
| TCGA-B0-5099 | KIRC | 485  | 0 | 485  | 0 | 2  | 0 | 0 |
| TCGA-B0-5092 | KIRC | 459  | 0 | 459  | 0 | 1  | 0 | 0 |
| TCGA-B0-4823 | KIRC | 454  | 0 | 454  | 0 | 1  | 0 | 0 |
| TCGA-AK-3465 | KIRC | 369  | 1 | 369  | 1 | 1  | 0 | 0 |
| TCGA-A3-3363 | KIRC | 319  | 1 | 319  | 1 | 1  | 0 | 0 |
| TCGA-B0-5095 | KIRC | 245  | 0 | 245  | 0 | 2  | 0 | 0 |
| TCGA-EU-5906 | KIRC | 206  | 1 | 206  | 1 | 1  | 0 | 0 |
| TCGA-B4-5836 | KIRC | 141  | 1 | 141  | 1 | 1  | 0 | 0 |
| TCGA-EU-5907 | KIRC | 127  | 1 | 127  | 1 | 2  | 0 | 0 |
| TCGA-EU-5905 | KIRC | 119  | 1 | 119  | 1 | 1  | 0 | 0 |
| TCGA-B0-5096 | KIRC | 68   | 0 | 68   | 0 | 3  | 0 | 0 |
| TCGA-B2-4098 | KIRC | 51   | 0 | 51   | 0 | 1  | 0 | 0 |
| TCGA-AS-3778 | KIRC | 43   | 1 | 43   | 1 | 1  | 0 | 0 |
| TCGA-B8-5162 | KIRC | 36   | 1 | 36   | 1 | 1  | 1 | 0 |
| TCGA-B8-5164 | KIRC | 26   | 1 | 26   | 1 | 2  | 0 | 0 |
| TCGA-A3-3308 | KIRC | 16   | 1 | 16   | 1 | 2  | 0 | 0 |
| TCGA-B4-5843 | KIRC | 11   | 1 | 11   | 1 | 1  | 0 | 0 |
| TCGA-B4-5832 | KIRC | 7    | 1 | 7    | 1 | 2  | 0 | 0 |
| TCGA-BB-4223 | HNSC | 1825 | 1 | 1825 | 1 | 3  | 1 | 1 |
| TCGA-BB-8596 | HNSC | 1825 | 1 | 1825 | 1 | 3  | 0 | 1 |
| TCGA-CR-5243 | HNSC | 1825 | 1 | 1825 | 1 | NA | 1 | 1 |
| TCGA-CV-5430 | HNSC | 1825 | 1 | 783  | 0 | 4  | 1 | 1 |
| TCGA-CV-5434 | HNSC | 1825 | 1 | 1825 | 1 | 4  | 1 | 1 |
| TCGA-CV-6933 | HNSC | 1825 | 1 | 1825 | 1 | 3  | 0 | 0 |
| TCGA-CV-6942 | HNSC | 1825 | 1 | 1825 | 1 | 1  | 0 | 0 |
| TCGA-CV-7089 | HNSC | 1825 | 1 | 1825 | 1 | 4  | 0 | 0 |
| TCGA-CV-7090 | HNSC | 1825 | 1 | 1825 | 1 | 1  | 0 | 0 |
| TCGA-CV-7091 | HNSC | 1825 | 1 | 1825 | 1 | 1  | 0 | 0 |

|              |      |      |   |      |   |    |   |   |
|--------------|------|------|---|------|---|----|---|---|
| TCGA-CV-7178 | HNSC | 1825 | 1 | 1825 | 1 | 4  | 0 | 0 |
| TCGA-CV-7183 | HNSC | 1825 | 1 | 1825 | 1 | 1  | 0 | 0 |
| TCGA-CV-7250 | HNSC | 1825 | 1 | 1825 | 1 | 3  | 0 | 0 |
| TCGA-CV-7411 | HNSC | 1825 | 1 | 1825 | 1 | 3  | 0 | 0 |
| TCGA-CV-7423 | HNSC | 1825 | 1 | 1825 | 1 | 1  | 0 | 0 |
| TCGA-CV-7427 | HNSC | 1825 | 1 | 1825 | 1 | 1  | 0 | 0 |
| TCGA-CV-7432 | HNSC | 1825 | 1 | 1825 | 1 | 1  | 0 | 0 |
| TCGA-CV-7435 | HNSC | 1825 | 1 | 1825 | 1 | 4  | 0 | 0 |
| TCGA-CR-6467 | HNSC | 1777 | 1 | 1777 | 1 | 2  | 0 | 1 |
| TCGA-BA-5153 | HNSC | 1762 | 0 | 1522 | 0 | 1  | 1 | 1 |
| TCGA-CV-7406 | HNSC | 1748 | 0 | 1748 | 0 | 1  | 0 | 1 |
| TCGA-CV-7235 | HNSC | 1724 | 1 | 1724 | 1 | 1  | 0 | 0 |
| TCGA-CV-7425 | HNSC | 1718 | 0 | 1718 | 0 | 2  | 0 | 0 |
| TCGA-CV-7103 | HNSC | 1591 | 0 | 1591 | 0 | 3  | 0 | 0 |
| TCGA-CR-6470 | HNSC | 1521 | 1 | 1521 | 1 | 1  | 1 | 1 |
| TCGA-CR-7404 | HNSC | 1472 | 1 | 234  | 0 | NA | 1 | 1 |
| TCGA-CQ-7063 | HNSC | 1461 | 1 | 1461 | 1 | 1  | 0 | 0 |
| TCGA-CV-7238 | HNSC | 1444 | 1 | 1444 | 1 | 1  | 0 | 0 |
| TCGA-CR-7386 | HNSC | 1430 | 1 | 1028 | 0 | 4  | 1 | 1 |
| TCGA-BA-5152 | HNSC | 1288 | 1 | 1288 | 1 | 3  | 0 | 1 |
| TCGA-CR-7368 | HNSC | 1245 | 1 | 1245 | 1 | 4  | 1 | 1 |
| TCGA-CQ-5324 | HNSC | 1207 | 1 | 1207 | 1 | 2  | 0 | 0 |
| TCGA-CR-6471 | HNSC | 1202 | 0 | 498  | 0 | 4  | 1 | 1 |
| TCGA-CR-7365 | HNSC | 1191 | 1 | 1191 | 1 | 3  | 1 | 1 |
| TCGA-BA-4077 | HNSC | 1134 | 0 | 1134 | 0 | 3  | 1 | 0 |
| TCGA-CV-7242 | HNSC | 1095 | 1 | 1095 | 1 | 1  | 0 | 0 |
| TCGA-CR-7369 | HNSC | 1090 | 0 | 1090 | 0 | 4  | 0 | 0 |
| TCGA-CN-4741 | HNSC | 1086 | 1 | 1086 | 1 | 3  | 1 | 1 |
| TCGA-CN-5360 | HNSC | 1081 | 1 | 1081 | 1 | 3  | 1 | 1 |
| TCGA-CV-7407 | HNSC | 1081 | 0 | 1081 | 0 | 1  | 0 | 0 |
| TCGA-CR-7401 | HNSC | 1077 | 1 | 1077 | 1 | 1  | 0 | 0 |
| TCGA-CQ-6223 | HNSC | 1057 | 1 | 1057 | 1 | 1  | 0 | 0 |
| TCGA-CR-6472 | HNSC | 1050 | 1 | 1050 | 1 | NA | 1 | 1 |
| TCGA-CV-7422 | HNSC | 1037 | 0 | 1037 | 0 | 4  | 0 | 0 |
| TCGA-CQ-5331 | HNSC | 1028 | 1 | 1028 | 1 | 1  | 0 | 0 |
| TCGA-CQ-7065 | HNSC | 1007 | 1 | 230  | 0 | 1  | 1 | 1 |
| TCGA-CQ-6221 | HNSC | 1000 | 1 | 1000 | 1 | 1  | 0 | 0 |
| TCGA-CQ-6220 | HNSC | 985  | 0 | 985  | 0 | 2  | 0 | 0 |
| TCGA-CR-7395 | HNSC | 930  | 1 | 930  | 1 | 1  | 0 | 0 |
| TCGA-CR-7402 | HNSC | 911  | 1 | 911  | 1 | NA | 1 | 1 |
| TCGA-CR-7390 | HNSC | 907  | 1 | 907  | 1 | 3  | 0 | 0 |
| TCGA-CQ-7069 | HNSC | 901  | 1 | 901  | 1 | 1  | 0 | 0 |
| TCGA-CQ-5330 | HNSC | 896  | 1 | 896  | 1 | 4  | 1 | 1 |
| TCGA-CR-7373 | HNSC | 889  | 1 | 889  | 1 | 4  | 1 | 1 |
| TCGA-CQ-7071 | HNSC | 877  | 1 | 877  | 1 | 2  | 0 | 1 |
| TCGA-CQ-6218 | HNSC | 870  | 1 | 870  | 1 | 4  | 1 | 1 |
| TCGA-CV-6960 | HNSC | 862  | 0 | 862  | 0 | 2  | 0 | 0 |
| TCGA-CQ-5329 | HNSC | 841  | 1 | 841  | 1 | 1  | 0 | 0 |
| TCGA-CN-4740 | HNSC | 839  | 0 | 224  | 0 | 3  | 1 | 1 |
| TCGA-CR-7388 | HNSC | 823  | 0 | 334  | 0 | NA | 1 | 1 |
| TCGA-CQ-6229 | HNSC | 815  | 1 | 815  | 1 | 1  | 0 | 0 |
| TCGA-CR-5250 | HNSC | 799  | 1 | 799  | 1 | NA | 1 | 1 |
| TCGA-CV-7245 | HNSC | 797  | 1 | 797  | 1 | 3  | 0 | 0 |
| TCGA-CR-7382 | HNSC | 796  | 1 | 614  | 0 | 3  | 1 | 1 |
| TCGA-CV-7416 | HNSC | 763  | 0 | 763  | 0 | 3  | 1 | 1 |
| TCGA-BA-5556 | HNSC | 725  | 1 | 725  | 1 | 1  | 0 | 0 |
| TCGA-BA-5151 | HNSC | 722  | 1 | 517  | 0 | 3  | 0 | 1 |
| TCGA-CV-7415 | HNSC | 695  | 0 | 695  | 0 | 4  | 0 | 0 |
| TCGA-CN-4731 | HNSC | 693  | 1 | 243  | 0 | 4  | 1 | 1 |
| TCGA-CQ-7068 | HNSC | 693  | 1 | 693  | 1 | 1  | 0 | 1 |
| TCGA-CV-6939 | HNSC | 666  | 0 | 666  | 0 | 4  | 0 | 0 |
| TCGA-CV-7177 | HNSC | 663  | 0 | 663  | 0 | 1  | 0 | 0 |
| TCGA-BA-6869 | HNSC | 644  | 1 | 644  | 1 | 2  | 0 | 1 |
| TCGA-BB-8601 | HNSC | 624  | 1 | 624  | 1 | 3  | 0 | 0 |
| TCGA-CV-6937 | HNSC | 624  | 0 | 624  | 0 | 1  | 0 | 0 |
| TCGA-BA-5557 | HNSC | 623  | 1 | 623  | 1 | 1  | 1 | 1 |
| TCGA-CN-4728 | HNSC | 613  | 1 | 613  | 1 | 4  | 1 | 1 |
| TCGA-CR-7380 | HNSC | 606  | 0 | 561  | 0 | 3  | 1 | 1 |
| TCGA-CV-7433 | HNSC | 601  | 0 | 601  | 0 | 4  | 0 | 0 |
| TCGA-CV-5436 | HNSC | 584  | 0 | 584  | 0 | 4  | 0 | 0 |

|              |      |     |   |     |   |    |   |   |
|--------------|------|-----|---|-----|---|----|---|---|
| TCGA-CV-7247 | HNSC | 577 | 0 | 577 | 0 | 2  | 0 | 0 |
| TCGA-CV-7263 | HNSC | 560 | 0 | 560 | 0 | 1  | 0 | 0 |
| TCGA-BB-4228 | HNSC | 558 | 1 | 558 | 1 | 2  | 0 | 1 |
| TCGA-CN-4737 | HNSC | 541 | 1 | 541 | 1 | 3  | 1 | 1 |
| TCGA-CN-A63U | HNSC | 526 | 1 | 526 | 1 | 4  | 0 | 1 |
| TCGA-BA-A4IF | HNSC | 523 | 1 | 523 | 1 | NA | 1 | 1 |
| TCGA-CR-7383 | HNSC | 521 | 0 | 454 | 0 | 1  | 1 | 1 |
| TCGA-CV-7248 | HNSC | 521 | 0 | 521 | 0 | 4  | 0 | 0 |
| TCGA-BA-5555 | HNSC | 520 | 1 | 248 | 0 | 4  | 0 | 0 |
| TCGA-CR-6477 | HNSC | 514 | 1 | 514 | 1 | NA | 1 | 1 |
| TCGA-CN-5356 | HNSC | 512 | 1 | 512 | 1 | 2  | 0 | 0 |
| TCGA-CV-7430 | HNSC | 495 | 0 | 495 | 0 | 3  | 0 | 0 |
| TCGA-CN-5364 | HNSC | 493 | 0 | 493 | 0 | 4  | 1 | 1 |
| TCGA-CN-6989 | HNSC | 490 | 1 | 436 | 0 | 4  | 1 | 1 |
| TCGA-CN-5355 | HNSC | 488 | 1 | 488 | 1 | 3  | 0 | 0 |
| TCGA-BA-4074 | HNSC | 462 | 0 | 396 | 0 | 3  | 0 | 1 |
| TCGA-CN-4730 | HNSC | 462 | 1 | 462 | 1 | 4  | 0 | 0 |
| TCGA-CV-6950 | HNSC | 459 | 0 | 459 | 0 | 4  | 0 | 0 |
| TCGA-CQ-6228 | HNSC | 456 | 0 | 273 | 0 | 2  | 0 | 1 |
| TCGA-BA-6870 | HNSC | 451 | 0 | 451 | 0 | NA | 1 | 1 |
| TCGA-CN-A49B | HNSC | 447 | 1 | 447 | 1 | 3  | 0 | 1 |
| TCGA-CN-6013 | HNSC | 433 | 1 | 323 | 0 | 4  | 1 | 1 |
| TCGA-CN-6996 | HNSC | 432 | 1 | 350 | 0 | 4  | 1 | 1 |
| TCGA-BA-4076 | HNSC | 415 | 0 | 286 | 0 | NA | 0 | 1 |
| TCGA-CQ-6225 | HNSC | 403 | 0 | 180 | 0 | 2  | 0 | 0 |
| TCGA-CN-6997 | HNSC | 398 | 1 | 279 | 0 | 4  | 1 | 1 |
| TCGA-CN-4742 | HNSC | 397 | 0 | 397 | 0 | 4  | 1 | 1 |
| TCGA-CN-4736 | HNSC | 395 | 0 | 209 | 0 | 1  | 1 | 1 |
| TCGA-CN-6992 | HNSC | 394 | 1 | 394 | 1 | 4  | 1 | 1 |
| TCGA-CV-7104 | HNSC | 393 | 0 | 393 | 0 | 3  | 0 | 0 |
| TCGA-CR-7389 | HNSC | 392 | 1 | 392 | 1 | NA | 1 | 1 |
| TCGA-CN-6019 | HNSC | 391 | 1 | 391 | 1 | 3  | 1 | 1 |
| TCGA-CV-7097 | HNSC | 385 | 0 | 385 | 0 | 1  | 0 | 0 |
| TCGA-CN-A641 | HNSC | 367 | 1 | 367 | 1 | 4  | 1 | 1 |
| TCGA-CR-6480 | HNSC | 362 | 1 | 362 | 1 | NA | 1 | 1 |
| TCGA-CN-5366 | HNSC | 360 | 0 | 276 | 0 | 4  | 1 | 1 |
| TCGA-CR-5247 | HNSC | 358 | 1 | 358 | 1 | NA | 1 | 1 |
| TCGA-CN-6998 | HNSC | 357 | 0 | 244 | 0 | 4  | 1 | 1 |
| TCGA-CN-5365 | HNSC | 351 | 0 | 351 | 0 | 4  | 0 | 0 |
| TCGA-CN-6994 | HNSC | 350 | 1 | 350 | 1 | 3  | 0 | 0 |
| TCGA-CN-6024 | HNSC | 337 | 0 | 156 | 0 | 4  | 0 | 0 |
| TCGA-CV-7180 | HNSC | 327 | 0 | 327 | 0 | 1  | 0 | 0 |
| TCGA-CN-6988 | HNSC | 318 | 1 | 318 | 1 | 4  | 0 | 0 |
| TCGA-CQ-5332 | HNSC | 317 | 0 | 317 | 0 | 2  | 0 | 0 |
| TCGA-CN-6016 | HNSC | 316 | 1 | 316 | 1 | 4  | 1 | 1 |
| TCGA-CV-6935 | HNSC | 295 | 0 | 295 | 0 | 4  | 0 | 0 |
| TCGA-CV-7413 | HNSC | 294 | 0 | 294 | 0 | 1  | 0 | 0 |
| TCGA-CN-5374 | HNSC | 290 | 1 | 290 | 1 | 3  | 1 | 1 |
| TCGA-CR-6493 | HNSC | 282 | 0 | 282 | 0 | 4  | 0 | 0 |
| TCGA-CN-6022 | HNSC | 281 | 0 | 101 | 0 | 4  | 0 | 1 |
| TCGA-CR-7377 | HNSC | 279 | 0 | 279 | 0 | 4  | 0 | 0 |
| TCGA-BB-4224 | HNSC | 278 | 1 | 175 | 0 | 3  | 1 | 1 |
| TCGA-BA-4078 | HNSC | 276 | 0 | 276 | 0 | NA | 0 | 1 |
| TCGA-CV-7100 | HNSC | 274 | 0 | 274 | 0 | 2  | 0 | 0 |
| TCGA-CN-5370 | HNSC | 259 | 0 | 123 | 0 | 3  | 1 | 1 |
| TCGA-CN-5363 | HNSC | 253 | 0 | 53  | 0 | 4  | 0 | 0 |
| TCGA-CV-7099 | HNSC | 243 | 0 | 243 | 0 | 1  | 0 | 0 |
| TCGA-BA-A6DF | HNSC | 238 | 0 | 238 | 0 | 3  | 0 | 1 |
| TCGA-CN-4734 | HNSC | 227 | 1 | 227 | 1 | 1  | 0 | 1 |
| TCGA-CV-7434 | HNSC | 218 | 0 | 218 | 0 | 4  | 0 | 0 |
| TCGA-CN-6020 | HNSC | 205 | 0 | 205 | 0 | 2  | 0 | 1 |
| TCGA-CN-4727 | HNSC | 194 | 1 | 194 | 1 | 3  | 1 | 1 |
| TCGA-CR-7399 | HNSC | 181 | 1 | 181 | 1 | 4  | 0 | 1 |
| TCGA-CN-A63Y | HNSC | 175 | 1 | 175 | 1 | 1  | 0 | 0 |
| TCGA-CN-4729 | HNSC | 156 | 1 | 156 | 1 | 2  | 0 | 0 |
| TCGA-CR-7398 | HNSC | 156 | 1 | 156 | 1 | 1  | 0 | 0 |
| TCGA-CV-7252 | HNSC | 151 | 0 | 151 | 0 | 3  | 0 | 0 |
| TCGA-CV-6938 | HNSC | 144 | 0 | 144 | 0 | 1  | 0 | 0 |
| TCGA-CV-7236 | HNSC | 144 | 0 | 144 | 0 | 4  | 0 | 0 |
| TCGA-CN-4726 | HNSC | 142 | 0 | 79  | 0 | 4  | 1 | 1 |

|              |      |      |    |      |    |    |   |   |
|--------------|------|------|----|------|----|----|---|---|
| TCGA-CQ-6227 | HNSC | 129  | 0  | 129  | 0  | 4  | 0 | 0 |
| TCGA-BA-6873 | HNSC | 122  | 1  | 66   | 0  | 4  | 1 | 1 |
| TCGA-CN-6995 | HNSC | 112  | 0  | 112  | 0  | 3  | 0 | 0 |
| TCGA-BA-6871 | HNSC | 108  | 0  | 108  | 0  | NA | 0 | 1 |
| TCGA-CV-7429 | HNSC | 107  | 0  | 107  | 0  | 4  | 0 | 0 |
| TCGA-CR-7370 | HNSC | 105  | 1  | 105  | 1  | NA | 0 | 1 |
| TCGA-CR-7371 | HNSC | 94   | 0  | 94   | 0  | 3  | 0 | 0 |
| TCGA-CV-6961 | HNSC | 76   | 0  | 76   | 0  | 1  | 0 | 0 |
| TCGA-CV-6934 | HNSC | 65   | 0  | 65   | 0  | 4  | 0 | 0 |
| TCGA-CV-7102 | HNSC | 56   | 0  | 56   | 0  | 4  | 0 | 0 |
| TCGA-CN-6018 | HNSC | 45   | 1  | 45   | 1  | 4  | 0 | 0 |
| TCGA-CR-7374 | HNSC | 30   | 1  | 30   | 1  | NA | 0 | 0 |
| TCGA-C9-A47Z | HNSC | 5    | 1  | 5    | 1  | 2  | 0 | 0 |
| TCGA-C9-A480 | HNSC | 4    | 1  | 4    | 1  | 2  | 0 | 0 |
| TCGA-CV-7421 | HNSC | 2    | 0  | 2    | 0  | 3  | 0 | 0 |
| TCGA-32-2498 | GBM  | NA   | NA | NA   | NA | NA | 0 | 0 |
| TCGA-76-6283 | GBM  | NA   | NA | NA   | NA | NA | 0 | 0 |
| TCGA-06-0178 | GBM  | 1825 | 1  | 192  | 0  | NA | 1 | 1 |
| TCGA-06-0184 | GBM  | 1825 | 1  | 1276 | 0  | NA | 1 | 1 |
| TCGA-06-0185 | GBM  | 1825 | 1  | 711  | 0  | NA | 1 | 1 |
| TCGA-06-6693 | GBM  | 1825 | 1  | 1825 | 1  | NA | 0 | 0 |
| TCGA-14-1450 | GBM  | 1788 | 1  | 826  | 0  | NA | 1 | 1 |
| TCGA-06-0241 | GBM  | 1481 | 0  | 196  | 0  | NA | 1 | 1 |
| TCGA-06-0744 | GBM  | 1426 | 0  | 1277 | 0  | NA | 1 | 1 |
| TCGA-06-0151 | GBM  | 1417 | 0  | 1417 | 0  | NA | 1 | 1 |
| TCGA-06-0876 | GBM  | 1405 | 1  | 424  | 0  | NA | 1 | 1 |
| TCGA-06-0188 | GBM  | 1356 | 0  | 310  | 0  | NA | 1 | 1 |
| TCGA-27-1834 | GBM  | 1233 | 0  | 335  | 0  | NA | 1 | 1 |
| TCGA-06-0879 | GBM  | 1229 | 0  | 699  | 0  | NA | 1 | 1 |
| TCGA-06-0192 | GBM  | 1185 | 0  | 648  | 0  | NA | 1 | 1 |
| TCGA-12-0619 | GBM  | 1062 | 0  | 203  | 0  | NA | 1 | 1 |
| TCGA-14-0871 | GBM  | 880  | 0  | 880  | 0  | NA | 0 | 1 |
| TCGA-06-0187 | GBM  | 828  | 0  | 531  | 0  | NA | 1 | 1 |
| TCGA-12-0688 | GBM  | 811  | 0  | 228  | 0  | NA | 1 | 1 |
| TCGA-06-0132 | GBM  | 771  | 0  | 482  | 0  | NA | 1 | 1 |
| TCGA-27-1833 | GBM  | 737  | 0  | 469  | 0  | NA | 1 | 1 |
| TCGA-06-0216 | GBM  | 735  | 0  | 175  | 0  | NA | 1 | 1 |
| TCGA-76-6286 | GBM  | 638  | 0  | 180  | 0  | NA | 1 | 1 |
| TCGA-74-6575 | GBM  | 636  | 1  | 93   | 0  | NA | 1 | 1 |
| TCGA-06-0882 | GBM  | 632  | 0  | 213  | 0  | NA | 1 | 1 |
| TCGA-06-0240 | GBM  | 621  | 0  | 621  | 0  | NA | 1 | 1 |
| TCGA-06-0168 | GBM  | 598  | 0  | 461  | 0  | NA | 1 | 1 |
| TCGA-08-0386 | GBM  | 548  | 0  | 427  | 0  | NA | 1 | 1 |
| TCGA-14-1823 | GBM  | 543  | 0  | 140  | 0  | NA | 1 | 1 |
| TCGA-81-5911 | GBM  | 539  | 1  | 277  | 0  | NA | 1 | 1 |
| TCGA-16-0848 | GBM  | 535  | 0  | 129  | 0  | NA | 1 | 1 |
| TCGA-12-0615 | GBM  | 467  | 0  | 160  | 0  | NA | 1 | 1 |
| TCGA-06-1806 | GBM  | 466  | 0  | 466  | 0  | NA | 1 | 1 |
| TCGA-06-0214 | GBM  | 457  | 0  | 48   | 0  | NA | 1 | 1 |
| TCGA-02-0047 | GBM  | 448  | 0  | 57   | 0  | NA | 0 | 1 |
| TCGA-12-0616 | GBM  | 448  | 0  | 398  | 0  | NA | 1 | 1 |
| TCGA-74-6578 | GBM  | 436  | 1  | 222  | 0  | NA | 1 | 1 |
| TCGA-06-0686 | GBM  | 432  | 0  | 160  | 0  | NA | 1 | 1 |
| TCGA-06-0154 | GBM  | 424  | 0  | 208  | 0  | NA | 1 | 1 |
| TCGA-15-0742 | GBM  | 419  | 0  | 232  | 0  | NA | 1 | 1 |
| TCGA-06-0237 | GBM  | 415  | 0  | 415  | 0  | NA | 1 | 1 |
| TCGA-06-0238 | GBM  | 405  | 0  | 311  | 0  | NA | 1 | 1 |
| TCGA-12-0618 | GBM  | 395  | 0  | 395  | 0  | NA | 1 | 1 |
| TCGA-06-6697 | GBM  | 391  | 1  | 306  | 0  | NA | 1 | 1 |
| TCGA-06-0644 | GBM  | 384  | 0  | 85   | 0  | NA | 1 | 1 |
| TCGA-41-6646 | GBM  | 379  | 0  | 200  | 0  | NA | 1 | 1 |
| TCGA-14-0740 | GBM  | 364  | 0  | 364  | 0  | NA | 0 | 1 |
| TCGA-28-5211 | GBM  | 358  | 1  | 225  | 0  | NA | 1 | 1 |
| TCGA-06-0167 | GBM  | 347  | 0  | 347  | 0  | NA | 1 | 1 |
| TCGA-76-6280 | GBM  | 346  | 0  | 108  | 0  | NA | 1 | 1 |
| TCGA-14-0789 | GBM  | 342  | 0  | 105  | 0  | NA | 1 | 1 |
| TCGA-06-0158 | GBM  | 329  | 0  | 90   | 0  | NA | 1 | 1 |
| TCGA-06-0165 | GBM  | 324  | 0  | 324  | 0  | NA | 1 | 1 |
| TCGA-06-0648 | GBM  | 298  | 0  | 202  | 0  | NA | 1 | 1 |
| TCGA-76-6662 | GBM  | 282  | 1  | 205  | 0  | NA | 1 | 1 |

|              |      |      |   |      |   |    |   |   |
|--------------|------|------|---|------|---|----|---|---|
| TCGA-06-6695 | GBM  | 253  | 1 | 133  | 0 | NA | 1 | 1 |
| TCGA-74-6581 | GBM  | 250  | 1 | 250  | 1 | NA | 1 | 1 |
| TCGA-26-6173 | GBM  | 241  | 1 | 241  | 1 | NA | 1 | 1 |
| TCGA-06-0745 | GBM  | 239  | 0 | 92   | 0 | NA | 1 | 1 |
| TCGA-76-6664 | GBM  | 237  | 1 | 237  | 1 | NA | 1 | 0 |
| TCGA-76-6663 | GBM  | 235  | 1 | 235  | 1 | NA | 1 | 1 |
| TCGA-06-0209 | GBM  | 232  | 0 | 232  | 0 | NA | 0 | 1 |
| TCGA-14-1825 | GBM  | 232  | 0 | 82   | 0 | NA | 0 | 1 |
| TCGA-74-6584 | GBM  | 228  | 1 | 91   | 0 | NA | 1 | 1 |
| TCGA-06-0195 | GBM  | 225  | 0 | 147  | 0 | NA | 1 | 1 |
| TCGA-06-6694 | GBM  | 224  | 0 | 224  | 0 | NA | 0 | 0 |
| TCGA-06-0878 | GBM  | 218  | 1 | 66   | 0 | NA | 1 | 1 |
| TCGA-14-1829 | GBM  | 218  | 1 | 218  | 1 | NA | 1 | 1 |
| TCGA-06-0645 | GBM  | 175  | 0 | 175  | 0 | NA | 0 | 0 |
| TCGA-06-0646 | GBM  | 175  | 0 | 90   | 0 | NA | 1 | 1 |
| TCGA-06-0877 | GBM  | 172  | 0 | 172  | 0 | NA | 0 | 1 |
| TCGA-14-0817 | GBM  | 164  | 0 | 164  | 0 | NA | 0 | 0 |
| TCGA-06-6388 | GBM  | 159  | 0 | 85   | 0 | NA | 1 | 1 |
| TCGA-27-1830 | GBM  | 154  | 0 | 124  | 0 | NA | 1 | 1 |
| TCGA-76-6657 | GBM  | 153  | 0 | 135  | 0 | NA | 1 | 1 |
| TCGA-06-6701 | GBM  | 151  | 1 | 151  | 1 | NA | 1 | 1 |
| TCGA-76-6656 | GBM  | 147  | 0 | 147  | 0 | NA | 1 | 1 |
| TCGA-06-6698 | GBM  | 145  | 1 | 145  | 1 | NA | 1 | 1 |
| TCGA-06-6700 | GBM  | 145  | 1 | 145  | 1 | NA | 1 | 1 |
| TCGA-02-0003 | GBM  | 144  | 0 | 40   | 0 | NA | 1 | 1 |
| TCGA-19-5953 | GBM  | 144  | 0 | 119  | 0 | NA | 0 | 0 |
| TCGA-06-0173 | GBM  | 136  | 0 | 136  | 0 | NA | 0 | 0 |
| TCGA-74-6577 | GBM  | 132  | 1 | 132  | 0 | NA | 1 | 1 |
| TCGA-16-0861 | GBM  | 131  | 1 | 94   | 0 | NA | 1 | 1 |
| TCGA-16-0846 | GBM  | 119  | 0 | 119  | 0 | NA | 0 | 0 |
| TCGA-12-0692 | GBM  | 111  | 0 | 35   | 0 | NA | 1 | 0 |
| TCGA-74-6573 | GBM  | 105  | 0 | 105  | 0 | NA | 1 | 1 |
| TCGA-06-0174 | GBM  | 98   | 0 | 47   | 0 | NA | 1 | 1 |
| TCGA-06-0157 | GBM  | 97   | 0 | 97   | 0 | NA | 0 | 1 |
| TCGA-14-0862 | GBM  | 88   | 0 | 88   | 0 | NA | 0 | 0 |
| TCGA-02-0033 | GBM  | 86   | 0 | 32   | 0 | NA | 0 | 1 |
| TCGA-06-0747 | GBM  | 82   | 0 | 82   | 0 | NA | 1 | 1 |
| TCGA-06-0749 | GBM  | 82   | 0 | 82   | 0 | NA | 1 | 1 |
| TCGA-02-0055 | GBM  | 76   | 0 | 6    | 0 | NA | 1 | 1 |
| TCGA-26-6174 | GBM  | 71   | 1 | 71   | 1 | NA | 1 | 1 |
| TCGA-14-0787 | GBM  | 68   | 0 | 68   | 0 | NA | 0 | 0 |
| TCGA-06-0649 | GBM  | 64   | 0 | 64   | 0 | NA | 0 | 0 |
| TCGA-06-6699 | GBM  | 47   | 1 | 47   | 1 | NA | 1 | 1 |
| TCGA-14-1395 | GBM  | 42   | 0 | 42   | 0 | NA | 1 | 0 |
| TCGA-14-0813 | GBM  | 41   | 0 | 41   | 0 | NA | 0 | 0 |
| TCGA-06-0750 | GBM  | 28   | 0 | 28   | 0 | NA | 0 | 0 |
| TCGA-14-1043 | GBM  | 24   | 0 | 24   | 0 | NA | 0 | 1 |
| TCGA-06-0219 | GBM  | 22   | 0 | 22   | 0 | NA | 0 | 0 |
| TCGA-06-0213 | GBM  | 16   | 0 | 16   | 0 | NA | 0 | 0 |
| TCGA-76-6661 | GBM  | 7    | 1 | 7    | 1 | NA | 1 | 1 |
| TCGA-C5-A1BE | CESC | 1825 | 1 | 1825 | 1 | 1  | 1 | 1 |
| TCGA-C5-A1BJ | CESC | 1825 | 1 | 1825 | 1 | NA | 0 | 1 |
| TCGA-C5-A1BK | CESC | 1825 | 1 | 1825 | 1 | 1  | 0 | 0 |
| TCGA-C5-A1BL | CESC | 1825 | 1 | 1825 | 1 | 1  | 0 | 1 |
| TCGA-C5-A1BM | CESC | 1825 | 1 | 1825 | 1 | 2  | 0 | 1 |
| TCGA-C5-A1M5 | CESC | 1825 | 1 | 1825 | 1 | 1  | 0 | 1 |
| TCGA-DR-A0ZL | CESC | 1825 | 1 | 1825 | 1 | 1  | 0 | 0 |
| TCGA-DS-A0VM | CESC | 1825 | 1 | 1825 | 1 | 1  | 1 | 0 |
| TCGA-DS-A0VN | CESC | 1825 | 1 | 1825 | 1 | 1  | 1 | 1 |
| TCGA-C5-A1MF | CESC | 1617 | 1 | 1617 | 1 | 1  | 0 | 1 |
| TCGA-BI-A0VR | CESC | 1505 | 1 | 1505 | 1 | 2  | 0 | 0 |
| TCGA-C5-A1M7 | CESC | 1409 | 1 | 1409 | 1 | 1  | 0 | 0 |
| TCGA-DR-A0ZM | CESC | 1289 | 1 | 1289 | 1 | 2  | 1 | 1 |
| TCGA-C5-A1MN | CESC | 1245 | 0 | 1245 | 0 | NA | 1 | 1 |
| TCGA-C5-A1MH | CESC | 1186 | 0 | 1186 | 0 | NA | 1 | 1 |
| TCGA-DS-A0VK | CESC | 1118 | 0 | 1118 | 0 | 1  | 1 | 1 |
| TCGA-C5-A1BI | CESC | 1112 | 1 | 1112 | 1 | 1  | 1 | 1 |
| TCGA-C5-A1MI | CESC | 1083 | 0 | 1083 | 0 | 1  | 1 | 1 |
| TCGA-C5-A1M9 | CESC | 1065 | 0 | 1065 | 0 | 3  | 1 | 1 |
| TCGA-C5-A1M6 | CESC | 955  | 0 | 955  | 0 | NA | 1 | 1 |

|               |      |      |   |      |   |    |   |   |
|---------------|------|------|---|------|---|----|---|---|
| TCGA-C5-A1M8  | CESC | 919  | 1 | 919  | 1 | 1  | 0 | 1 |
| TCGA-FU-A23L  | CESC | 725  | 1 | 725  | 1 | 1  | 1 | 1 |
| TCGA-EX-A1H5  | CESC | 619  | 1 | 619  | 1 | 2  | 0 | 1 |
| TCGA-C5-A1BF  | CESC | 570  | 0 | 570  | 0 | NA | 1 | 1 |
| TCGA-C5-A0TN  | CESC | 348  | 0 | 348  | 0 | 1  | 1 | 1 |
| TCGA-C5-A1BN  | CESC | 166  | 0 | 166  | 0 | NA | 1 | 1 |
| TCGA-C5-A1MP  | CESC | 109  | 1 | 109  | 1 | 1  | 0 | 0 |
| TCGA-DS-A0VL  | CESC | 81   | 1 | 81   | 1 | 1  | 0 | 0 |
| TCGA-C5-A1MK  | CESC | 74   | 0 | 74   | 0 | NA | 1 | 1 |
| TCGA-FU-A23K  | CESC | 37   | 1 | 37   | 1 | 1  | 0 | 0 |
| TCGA-C5-A1MQ  | CESC | 17   | 1 | 17   | 1 | 1  | 1 | 1 |
| TCGA-C5-A1MJ  | CESC | 14   | 0 | 14   | 0 | 1  | 0 | 0 |
| TCGA-EA-A1QT  | CESC | 8    | 1 | 8    | 1 | 1  | 0 | 0 |
| TCGA-DK-A1A6  | BLCA | 1825 | 1 | 1825 | 1 | 2  | 0 | 0 |
| TCGA-DK-A1AD  | BLCA | 1825 | 1 | 1825 | 1 | 4  | 0 | 0 |
| TCGA-DK-A2I4  | BLCA | 1825 | 1 | 1825 | 1 | 2  | 0 | 0 |
| TCGA-DK-A2I6  | BLCA | 1825 | 1 | 1825 | 1 | 2  | 0 | 0 |
| TCGA-DK-A6AV  | BLCA | 1825 | 1 | 1825 | 1 | 1  | 0 | 0 |
| TCGA-DK-A6B0  | BLCA | 1825 | 1 | 1825 | 1 | 1  | 0 | 0 |
| TCGA-DK-A6B1  | BLCA | 1825 | 1 | 1825 | 1 | 1  | 0 | 0 |
| TCGA-FD-A3NA  | BLCA | 1825 | 1 | 1825 | 1 | 1  | 0 | 0 |
| TCGA-G2-A2EF  | BLCA | 1825 | 1 | 1825 | 1 | NA | 1 | 0 |
| TCGA-FD-A5C1  | BLCA | 1792 | 1 | 1792 | 1 | 2  | 1 | 0 |
| TCGA-DK-A3IS  | BLCA | 1529 | 1 | 1529 | 1 | 1  | 0 | 0 |
| TCGA-DK-A3X1  | BLCA | 1460 | 1 | 1460 | 1 | 2  | 0 | 0 |
| TCGA-FD-A3SQ  | BLCA | 1423 | 0 | 1423 | 0 | 4  | 1 | 0 |
| TCGA-E5-A2PC  | BLCA | 1326 | 1 | 1326 | 1 | 2  | 1 | 0 |
| TCGA-BL-A0C8  | BLCA | 1219 | 1 | 1219 | 1 | 1  | 0 | 0 |
| TCGA-E5-A4U1  | BLCA | 1181 | 1 | 1181 | 1 | 1  | 1 | 0 |
| TCGA-HQ-A2OE  | BLCA | 1174 | 1 | 1174 | 1 | 3  | 1 | 0 |
| TCGA-FD-A3B6  | BLCA | 1005 | 0 | 1005 | 0 | 1  | 0 | 0 |
| TCGA-FD-A3B3  | BLCA | 974  | 0 | 974  | 0 | 2  | 0 | 0 |
| TCGA-FJ-A3Z7  | BLCA | 945  | 1 | 945  | 1 | 4  | 1 | 0 |
| TCGA-DK-A6B6  | BLCA | 933  | 1 | 933  | 1 | NA | 1 | 0 |
| TCGA-G2-A2EJ  | BLCA | 931  | 1 | 931  | 1 | NA | 1 | 0 |
| TCGA-K4-A54R  | BLCA | 842  | 1 | 842  | 1 | 1  | 0 | 0 |
| TCGA-GV-A3QK  | BLCA | 832  | 1 | 832  | 1 | 4  | 1 | 1 |
| TCGA-K4-A3WS  | BLCA | 761  | 1 | 761  | 1 | 2  | 0 | 0 |
| TCGA-GC-A3YS  | BLCA | 758  | 1 | 758  | 1 | 3  | 0 | 0 |
| TCGA-FD-A3SL  | BLCA | 712  | 0 | 712  | 0 | 4  | 1 | 0 |
| TCGA-DK-A3IU  | BLCA | 706  | 0 | 706  | 0 | 1  | 1 | 0 |
| TCGA-FD-A43N  | BLCA | 699  | 1 | 699  | 1 | 2  | 0 | 0 |
| TCGA-FD-A3N5  | BLCA | 685  | 0 | 685  | 0 | 1  | 0 | 0 |
| TCGA-GV-A3JW  | BLCA | 649  | 1 | 649  | 1 | 1  | 0 | 1 |
| TCGA-K4-A3WV  | BLCA | 646  | 1 | 646  | 1 | 1  | 0 | 0 |
| TCGA-GD-A3OS  | BLCA | 638  | 1 | 638  | 1 | NA | 1 | 0 |
| TCGA-FD-A43U  | BLCA | 636  | 1 | 636  | 1 | 4  | 1 | 0 |
| TCGA-DK-A3WWW | BLCA | 633  | 1 | 633  | 1 | 2  | 1 | 0 |
| TCGA-BT-A2LD  | BLCA | 623  | 0 | 623  | 0 | 3  | 1 | 1 |
| TCGA-G2-A3IE  | BLCA | 612  | 0 | 612  | 0 | NA | 1 | 0 |
| TCGA-GV-A3JZ  | BLCA | 603  | 1 | 603  | 1 | 4  | 0 | 0 |
| TCGA-FD-A3SR  | BLCA | 602  | 0 | 602  | 0 | 4  | 1 | 0 |
| TCGA-H4-A2HQ  | BLCA | 590  | 1 | 590  | 1 | NA | 0 | 0 |
| TCGA-GV-A3JX  | BLCA | 581  | 1 | 581  | 1 | 2  | 0 | 0 |
| TCGA-DK-A1AA  | BLCA | 578  | 1 | 578  | 1 | 2  | 1 | 0 |
| TCGA-DK-A1A7  | BLCA | 560  | 1 | 112  | 0 | 4  | 0 | 0 |
| TCGA-FD-A3SM  | BLCA | 547  | 0 | 547  | 0 | 4  | 0 | 0 |
| TCGA-GC-A3WC  | BLCA | 540  | 1 | 540  | 1 | 2  | 0 | 0 |
| TCGA-DK-A3IQ  | BLCA | 539  | 0 | 539  | 0 | 2  | 1 | 0 |
| TCGA-DK-A1AF  | BLCA | 536  | 1 | 283  | 0 | 4  | 0 | 0 |
| TCGA-G2-A3VY  | BLCA | 536  | 1 | 536  | 1 | NA | 0 | 0 |
| TCGA-E7-A541  | BLCA | 529  | 1 | 529  | 1 | 1  | 0 | 0 |
| TCGA-FJ-A3ZF  | BLCA | 524  | 1 | 524  | 1 | NA | 1 | 0 |
| TCGA-FD-A3B4  | BLCA | 510  | 0 | 510  | 0 | 3  | 1 | 0 |
| TCGA-E7-A519  | BLCA | 508  | 1 | 508  | 1 | 1  | 0 | 0 |
| TCGA-DK-A1AE  | BLCA | 491  | 1 | 211  | 0 | 2  | 0 | 1 |
| TCGA-G2-A2EK  | BLCA | 485  | 1 | 485  | 1 | NA | 0 | 0 |
| TCGA-GC-A3OO  | BLCA | 481  | 1 | 481  | 1 | 1  | 0 | 0 |
| TCGA-DK-A1AG  | BLCA | 475  | 1 | 475  | 1 | 2  | 0 | 0 |
| TCGA-K4-A6MB  | BLCA | 469  | 1 | 469  | 1 | 3  | 0 | 0 |

|              |      |     |   |     |   |    |   |   |
|--------------|------|-----|---|-----|---|----|---|---|
| TCGA-E5-A4TZ | BLCA | 467 | 0 | 467 | 0 | 4  | 1 | 1 |
| TCGA-E7-A677 | BLCA | 443 | 1 | 443 | 1 | 1  | 0 | 0 |
| TCGA-GV-A3JV | BLCA | 434 | 0 | 434 | 0 | 3  | 0 | 0 |
| TCGA-GC-A3RD | BLCA | 428 | 1 | 428 | 1 | 2  | 0 | 0 |
| TCGA-E7-A678 | BLCA | 425 | 1 | 425 | 1 | 2  | 0 | 0 |
| TCGA-DK-A3IL | BLCA | 413 | 0 | 413 | 0 | 4  | 0 | 0 |
| TCGA-MV-A51V | BLCA | 410 | 1 | 410 | 1 | 2  | 0 | 0 |
| TCGA-BT-A0YX | BLCA | 400 | 0 | 326 | 0 | 2  | 0 | 0 |
| TCGA-CF-A47T | BLCA | 385 | 0 | 385 | 0 | 1  | 0 | 1 |
| TCGA-CF-A47V | BLCA | 379 | 1 | 379 | 1 | 1  | 0 | 1 |
| TCGA-CF-A47Y | BLCA | 373 | 1 | 373 | 1 | 1  | 0 | 0 |
| TCGA-CF-A47W | BLCA | 368 | 1 | 368 | 1 | 1  | 0 | 0 |
| TCGA-GU-A42R | BLCA | 344 | 1 | 344 | 1 | NA | 0 | 0 |
| TCGA-FD-A5BT | BLCA | 335 | 0 | 335 | 0 | 2  | 0 | 0 |
| TCGA-FJ-A3ZE | BLCA | 324 | 0 | 324 | 0 | NA | 0 | 1 |
| TCGA-GV-A3QI | BLCA | 322 | 1 | 322 | 1 | 2  | 0 | 0 |
| TCGA-DK-A3WX | BLCA | 321 | 0 | 321 | 0 | 2  | 1 | 1 |
| TCGA-DK-A3IV | BLCA | 294 | 0 | 294 | 0 | NA | 1 | 0 |
| TCGA-C4-A0EZ | BLCA | 273 | 0 | 273 | 0 | 4  | 0 | 0 |
| TCGA-GV-A40E | BLCA | 261 | 0 | 261 | 0 | NA | 1 | 1 |
| TCGA-GV-A3QH | BLCA | 258 | 0 | 258 | 0 | NA | 1 | 0 |
| TCGA-FD-A5BY | BLCA | 251 | 1 | 251 | 1 | 2  | 0 | 0 |
| TCGA-DK-A2I2 | BLCA | 237 | 0 | 237 | 0 | 4  | 0 | 0 |
| TCGA-GD-A2C5 | BLCA | 235 | 1 | 235 | 1 | 4  | 1 | 1 |
| TCGA-G2-A3IB | BLCA | 220 | 0 | 220 | 0 | NA | 0 | 0 |
| TCGA-CU-A0YR | BLCA | 219 | 1 | 219 | 0 | 3  | 0 | 0 |
| TCGA-FJ-A3Z9 | BLCA | 217 | 1 | 217 | 1 | 1  | 1 | 0 |
| TCGA-FD-A62O | BLCA | 216 | 0 | 216 | 0 | 4  | 0 | 0 |
| TCGA-FT-A61P | BLCA | 197 | 1 | 197 | 1 | 4  | 0 | 0 |
| TCGA-FD-A62P | BLCA | 191 | 0 | 191 | 0 | 1  | 0 | 0 |
| TCGA-FD-A5BX | BLCA | 173 | 0 | 173 | 0 | 3  | 0 | 0 |
| TCGA-FD-A3SO | BLCA | 168 | 0 | 168 | 0 | 3  | 1 | 0 |
| TCGA-CU-A3KJ | BLCA | 166 | 1 | 166 | 1 | 2  | 0 | 0 |
| TCGA-FD-A5BV | BLCA | 163 | 0 | 163 | 0 | 2  | 0 | 0 |
| TCGA-CU-A3QU | BLCA | 158 | 1 | 158 | 1 | 2  | 0 | 0 |
| TCGA-BT-A3PH | BLCA | 142 | 0 | 142 | 0 | 4  | 0 | 0 |
| TCGA-FD-A3B7 | BLCA | 122 | 0 | 122 | 0 | 2  | 0 | 0 |
| TCGA-FD-A43X | BLCA | 110 | 1 | 110 | 1 | 1  | 0 | 0 |
| TCGA-K4-A3WU | BLCA | 105 | 1 | 105 | 1 | 3  | 0 | 0 |
| TCGA-GD-A3OQ | BLCA | 95  | 1 | 95  | 1 | 4  | 0 | 0 |
| TCGA-K4-A4AB | BLCA | 84  | 1 | 84  | 1 | 3  | 0 | 0 |
| TCGA-FD-A62N | BLCA | 82  | 1 | 82  | 1 | 2  | 0 | 0 |
| TCGA-E7-A4XJ | BLCA | 68  | 0 | 68  | 0 | 1  | 0 | 0 |
| TCGA-GC-A3I6 | BLCA | 68  | 1 | 68  | 1 | 2  | 0 | 0 |
| TCGA-DK-A3IK | BLCA | 67  | 1 | 67  | 1 | 4  | 0 | 0 |
| TCGA-GD-A6C6 | BLCA | 67  | 1 | 67  | 1 | 2  | 0 | 0 |
| TCGA-C4-A0F0 | BLCA | 59  | 1 | 59  | 1 | 1  | 0 | 0 |
| TCGA-DK-A2HX | BLCA | 55  | 1 | 55  | 1 | 4  | 0 | 0 |
| TCGA-K4-A6FZ | BLCA | 55  | 1 | 55  | 1 | 2  | 0 | 0 |
| TCGA-H4-A2HO | BLCA | 46  | 1 | 46  | 1 | 3  | 0 | 0 |
| TCGA-E7-A7DV | BLCA | 37  | 1 | 37  | 1 | 4  | 0 | 0 |
| TCGA-E7-A5KF | BLCA | 20  | 1 | 20  | 1 | 1  | 0 | 0 |
| TCGA-E7-A5KE | BLCA | 17  | 1 | 17  | 1 | 1  | 0 | 0 |
| TCGA-CF-A1HS | BLCA | 13  | 1 | 13  | 1 | 2  | 0 | 0 |
| TCGA-E7-A3Y1 | BLCA | 3   | 1 | 3   | 1 | NA | 0 | 0 |
| TCGA-CF-A3MF | BLCA | 0   | 1 | 0   | 1 | 2  | 0 | 0 |
| TCGA-CF-A3MG | BLCA | 0   | 1 | 0   | 1 | 1  | 0 | 0 |

## 2. Quantification of intra-tumor heterogeneity

### Supplementary Note 2.1: Quantification of genetic ITH

#### *Inference of clonal composition by EXPANDS*

EXPANDS<sup>1</sup> version 1.4 was used with default parameters to infer subpopulation composition of tumor samples from sequencing data. EXPANDS is based on the assumption that passenger SNVs accumulate in a cell before a driver event causes a clonal expansion. Consequently, the driver event and all passenger events occurring prior to the driver should be represented in a similar fraction of cells. The model assumes a certain dependency between the number of SNVs detected in the sample and the number of subpopulations expected to co-exist in that sample (e.g. a tumor that harbors only one single somatic mutation cannot consist of two or more genetically distinct populations). Subpopulations (clones) are predicted by clustering SNVs based on their cellular prevalence.

In general, multiple cell-prevalence solutions can explain a given combination of B-allele frequency and copy number; for example an SNV with a B-allele frequency of 0.3, in a ubiquitously diploid region, can either be explained by a homozygous mutation present in 30% of the cells or by a heterozygous mutation present in 60% of the cells. To postpone the final decisions on cellular mutation prevalence and to reduce effects of noise in B-allele frequencies and copy numbers, entire probability distributions of cellular prevalence are clustered rather than single-value estimates of cellular prevalence. For above example, if the clustering result indicates the presence of a subpopulation at 60% of the sample, while a subpopulation at 30% is not found, then the heterozygous state will be assigned to the SNV. Allele-frequencies (and copy numbers) measured across all detected SNVs can thus help solve ambiguities as to the cellular prevalence and ploidy of individual SNVs.

The accuracy of allele frequencies and copy numbers translate to genomic depth of coverage, base- and mapping qualities as well as consistent experimental conditions for tumor- and control samples. Therefore, the number of clones detected per tumor serves for relative, qualitative comparison of ITH amongst samples sequenced under similar conditions, rather than for absolute quantification of ITH.

#### *Inference of clonal composition by PyClone*

The same copy number segments and SNVs used as input for EXPANDS, were used to infer subclonal composition with PyClone. Similar to EXPANDS, PyClone infers the clonal composition of a tumor by grouping SNVs with similar cell-frequencies together. However, inference of the cellular frequency of SNVs is different in that the PyClone model assumes the absence of subclonal CNVs. Therefore copy numbers were rounded to the nearest integer value before using them as PyClone input. In addition the sequencing depth of SNVs detected from TCGA exome sequencing data (Supplementary Figure 1.1) is marginally sufficient for PyClone, which is specialized to infer clonal structure from deep sequencing data (>100 fold coverage). Lastly, a-priori the PyClone model assumes the sequenced sample is a heterogeneous mixture of cells, which fall into three distinct subpopulations. Therefore, the number of subpopulations



detected by PyClone is less dependent on the number of SNVs per sample, than the number of subpopulations detected by EXPANDS (see also above).

In light of these conceptual differences between the two algorithms, PyClone was employed as follows. Let  $C_E$  denote the exact copy number of a segment  $C$  and  $C_R$  the rounded value to the nearest integer copy number. Segments  $S_{subclonal} := \{C \mid \|C_R - C_E\| > t\}$  have a higher likelihood to contain subclonal CNVs. Since PyClone does not offer the possibility to incorporate subclonal CNVs, we excluded clones which were backed up by less than 3 SNVs within segments  $S_{clonal} := \{C \mid \|C_R - C_E\| \leq t\}$  from further analysis. As threshold,  $t = 0.25$  was chosen. This exclusion rendered 58 tumor samples (5%) with no detectable clones.

We compared the results between EXPANDS and PyClone predictions of subclonal composition:

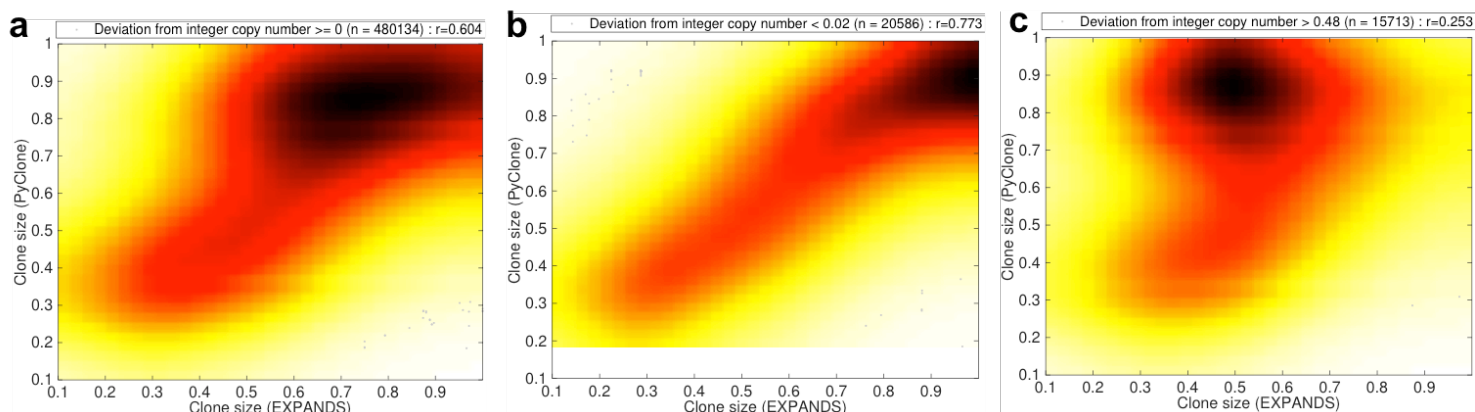

### Supplementary Figure 2.1

**Comparison of clone sizes predicted by EXPANDS and PyClone.** (a) Correlation between cellular frequency of SNVs assigned by EXPANDS (x-axis) and PyClone (y-axis) is shown across all SNVs detected in 1,107 tumor samples (Spearman  $r=0.61$ ). EXPANDS and PyClone are in considerably better agreement for SNVs embedded within segments for which all tumor cells have similar copy number (b) than for SNVs within segments affected by subclonal CNVs (c). This suggests that different a-priori assumptions regarding the presence of subclonal CNVs account for differences between the cellular frequency estimates of the two algorithms.

### *Relation between genetic ITH and driver mutation incidence*

Assuming that each detected clone is the result of a clonal expansion and that each clonal expansion is triggered by a driver mutation, the predicted number of clones also provides a lower boundary estimate of the number of driver events that preceded tumor detection. Compared to the five to eight driver events estimated by epidemiologic studies to be required for the development of solid tumors<sup>7</sup>, the number of inferred clones is lower (on average, 4 clones were detected per tumor). This is likely because normal cell contamination reduces clone detection sensitivity and because clone number informs only about the number of clonal expansions that have not yet reached fixation at the time of tumor detection.

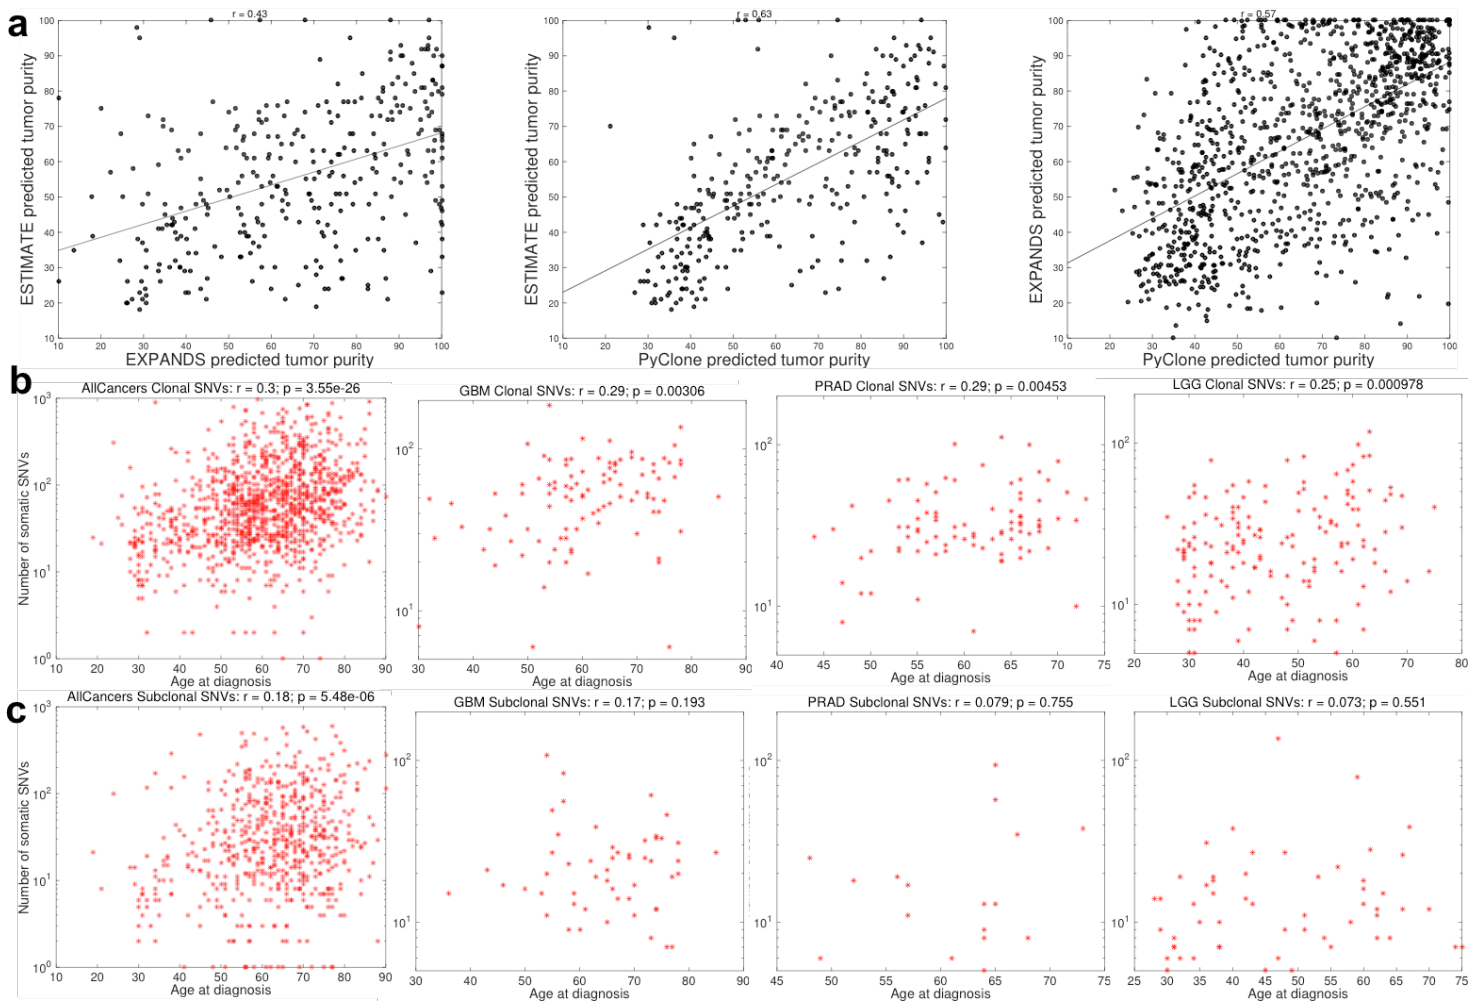

## Supplementary Figure 2.2

**Tumor purity predictions, clonal/subclonal SNVs and age at diagnosis. (a) Comparison between PyClone, EXPANDS and ESTIMATE predicted tumor purity.** Pairwise correlations between tumor purity predicted based on point mutations and copy number variations (either with EXPANDS or PyClone) and tumor purity predicted based on expression profiling (with ESTIMATE) in 324 TCGA samples (overlap between current study and ESTIMATE publication by Kosuke Yoshihara *et al.*<sup>8</sup>). Left panel: EXPANDS and ESTIMATE (Pearson  $r=0.43$ ); Central panel: PyClone and ESTIMATE ( $r=0.63$ ); right panel: PyClone and EXPANDS ( $r=0.57$ ). ESTIMATE, EXPANDS and PyClone all three predict >99% tumor purity for a subset of the samples. This is particularly frequent among older individuals, as the “normal” (non-tumor) cells are more likely to have acquired mutations as well. Therefore these “normal”, yet mutated cells can be confused with tumor cells. For example, for EXPANDS, the proportion of samples with >99% predicted tumor-cell fraction doubles from 3.1% among individuals younger than 50 years, to 6.2% among individuals above 50 years old. **(b) Age is associated with increasing number of somatic clonal SNVs.** Association between age at diagnosis and number of clonal somatic SNVs is shown for all cancers combined, glioblastoma (GBM), prostate adenocarcinoma (PRAD) and low-grade glioma (LGG). Clonal mutations are defined as SNVs present in minimum 75% of cancer cells. **(c) Correlation between clone number of somatic subclonal SNVs.** Subclonal mutations are defined as SNVs present in maximum 40% of cancer cells. For (b,c) Spearman rank correlation coefficients ( $r$ ) between age and SNV number is shown along with corresponding  $p$ -value on the top of each panel.

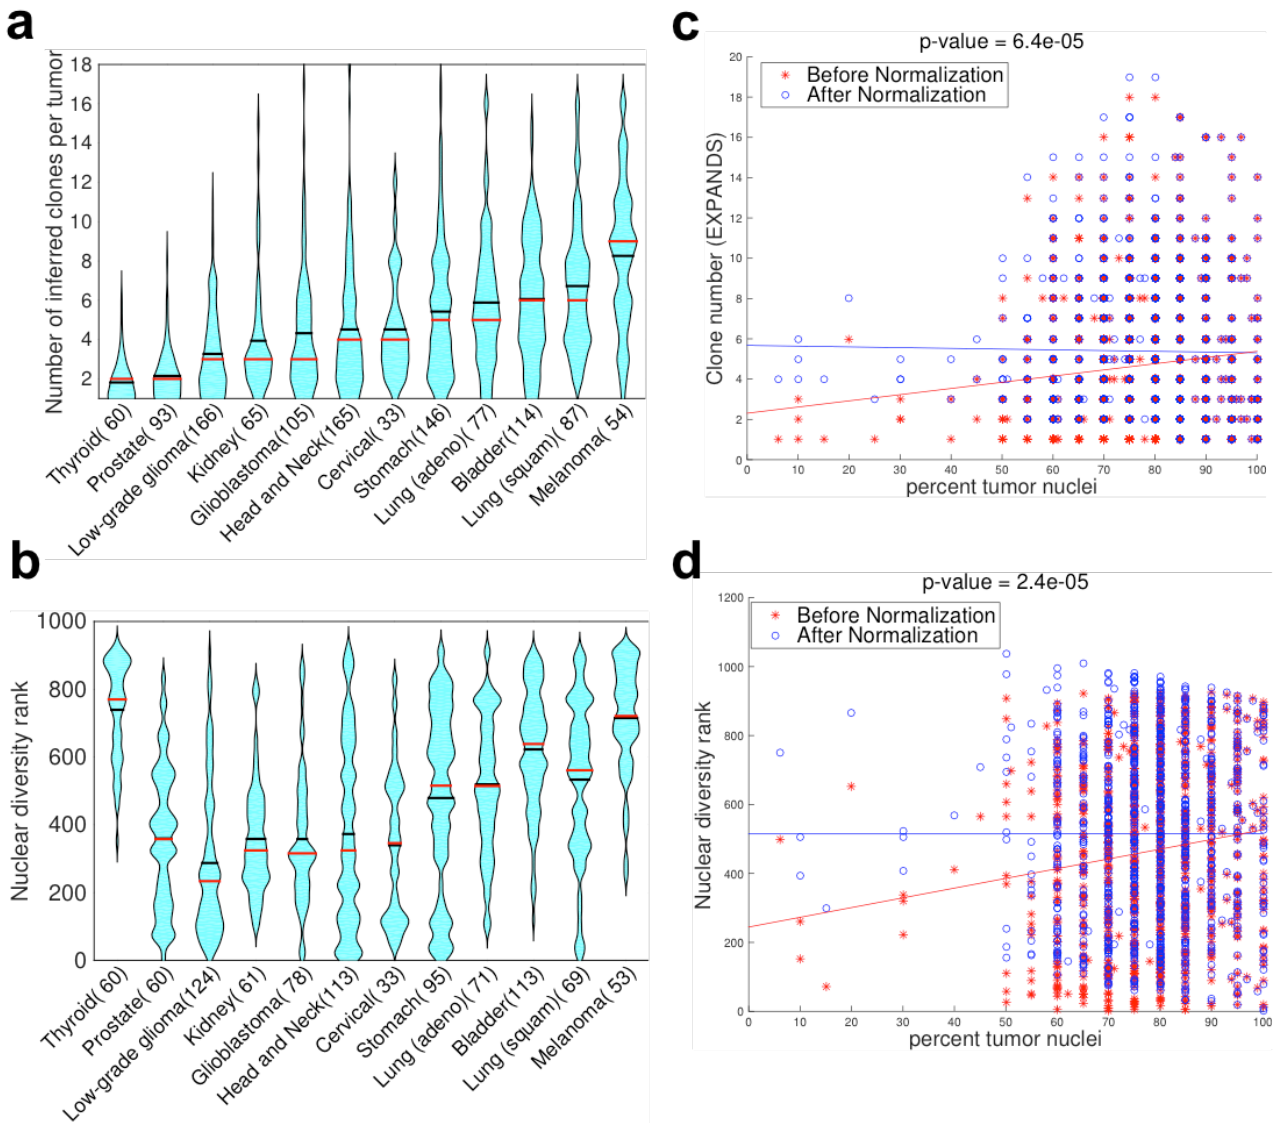

### Supplementary Figure 2.3

**ITH distribution across cancers before taking into account tumor purity.** Violin plots show clone number (a) and nuclear ITH (b) within tumor types. Percentage tumor nuclei estimated from histopathological examination correlates to the clone number predicted by EXPANDS (linear regression:  $P=6.4E-5$ ; coefficient=0.031) (c), and to the nuclear ITH inferred from H&E image analysis ( $P=2.4E-5$ ; coefficient=2.82) (d), but not to the clone number predicted by PyClone ( $P=0.51$ ; data not shown). EXPANDS clone numbers and nuclear ITH measures were therefore normalized by subtracting the tumor-purity associated effects quantified in the linear regression analysis. Tumor-purity normalized clone number and nuclear ITH are shown in main Figs. 1 and 4 respectively.

## Supplementary Note 2.4: Relation between tumor purity and clonal resolution

We addressed the hypothesis that no significant difference in clonal diversity exists between pure and un-pure tumor-samples, i.e. differential clone detection sensitivities between pure and un-pure samples are sufficient to explain differences in clone number.

Let  $x$  be the minimum clone size detectable in 100% pure tumors ( $p:=1$ ). The minimum detectable clone size increases with decreasing tumor purity, from  $x$  in 100% pure tumors to  $\frac{x}{p}$  in tumors of purity  $p<1$ .

Assuming the distribution of clone sizes in all tumors is the same as it in high-purity tumors, the expected number of clones,  $n_p$ , can be estimated as a function of tumor purity  $p$ :

$n_p = |\{s | s \geq \frac{x}{p}\}|$ , where  $x:=0.25$  and  $s$  are the sizes of clones detected in high-purity tumors ( $>0.9$ ), and  $p$  are tumor-purities ranging from 0.25 to 0.9. We chose  $x=0.25$ , because the dependency of detection sensitivity on clone size seems negligible for clones present in more than 25% of a high-purity sample (Fig. 2e). Comparing the expected and observed number of clones for variable tumor-purity categories  $p$ , suggests that reduced tumor purity is not sufficient to explain the decrease in detected clone number (Supplementary Figure 2.4b).

Comparing the expected and observed number of clones for variable tumor-purity categories  $p$ , suggests that reduced tumor purity is not sufficient to explain the decrease in detected clone number (Supplementary Figure 2.4b).

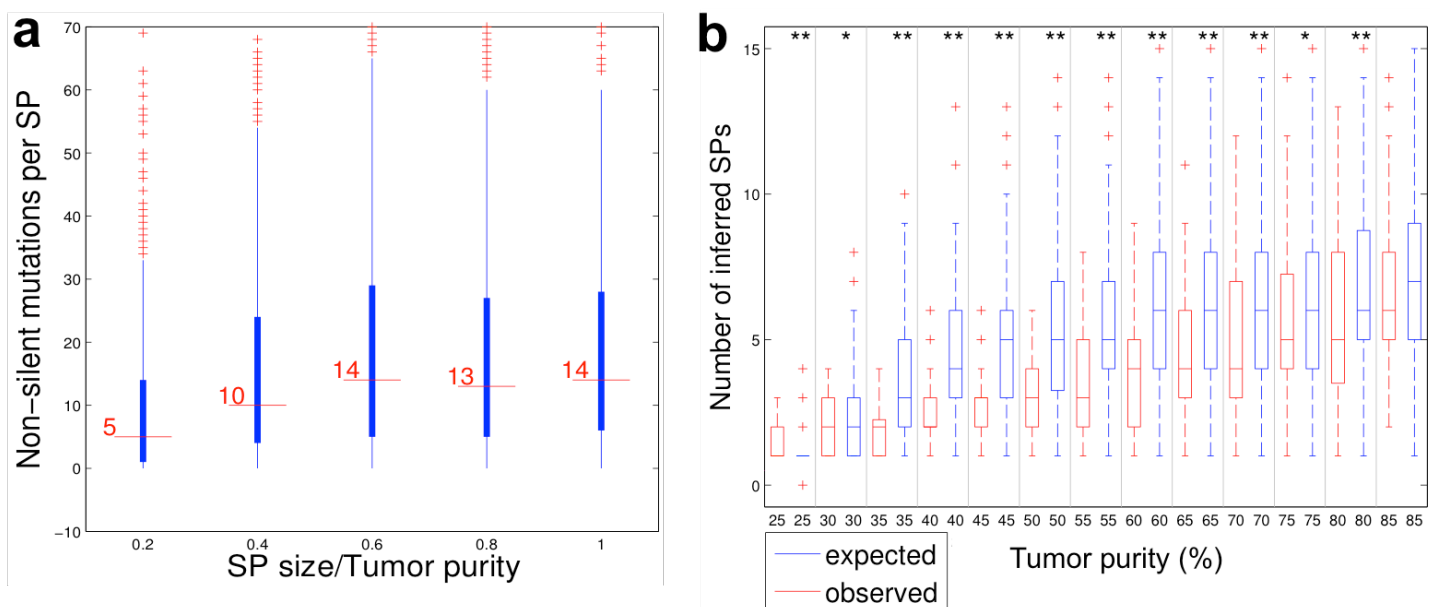

### Supplementary Figure 2.4

**(a) Non-silent mutations per clone.** Number of non-silent SNVs per clone (SP) is shown for clones of varying size, detected with EXPANDS among 1,165 tumors across 12 cancer types. Reduced incidence of SNVs in small clones is consistent with previous simulation experiments<sup>1</sup> and suggests that small clones will be increasingly missed with decreasing tumor purity. **(b) Expected and observed number of clones detected by EXPANDS in 1,165 samples of differential tumor purity.** Expected and observed clone number was compared within each 5%-tumor-purity category using a two-sample t-test ( $P<0.05$  \*;  $P<0.005$  \*\*).

## Supplementary Note 2.5: Quantification of nuclear ITH by H&E image analysis

CellProfiler<sup>6</sup> was used to detect nuclei within H&E images and to measure the size and staining intensity of each detected nucleus. A total of 2,613 representative H&E images were available for 1,064 (91%) of the sequenced tumor samples. For 382 of these images, the lower quartile of pixel intensities was zero (Supplementary Figure 2.5a). These images were mostly blank and were excluded leaving 2,231 H&E images covering 930 (80%) tumors. Across all images CellProfiler identified an average of 35,000 nuclei per image (Supplementary Figure 2.5b). For each image  $I$ , intra-tumoral nuclear diversity ( $d$ ) was then quantified from the variability of morphological features  $f$ , measured for nuclei in that image:

$$d_f^I = MAD_{Nuclei}(f), \text{ where } f := \{\text{mean radius}, \text{median intensity}, \text{mean intensity}\}$$

We observed a dependency of nuclear diversity features on image quality measures. Each nuclear diversity measure  $d_f^I$  was normalized to account for these effects (Supplementary Figure 2.5c-d). Nuclear diversity for each tumor sample,  $T$ , was then calculated as the median normalized nuclear diversity across all images from that tumor:  $d_f^T = Median_{I \in T}(d_f^I)$

Nuclear diversity ranks,  $R_f^T$ , were calculated for each tumor, by sorting tumor samples according to the corresponding diversity feature. The final quantification of nuclear diversity ( $D^T$ ) for each tumor,  $T$ , was derived from the median diversity rank:

$$D^T = \frac{Median_f(R_f^T)}{\max(Median_f(R_f^T))}$$

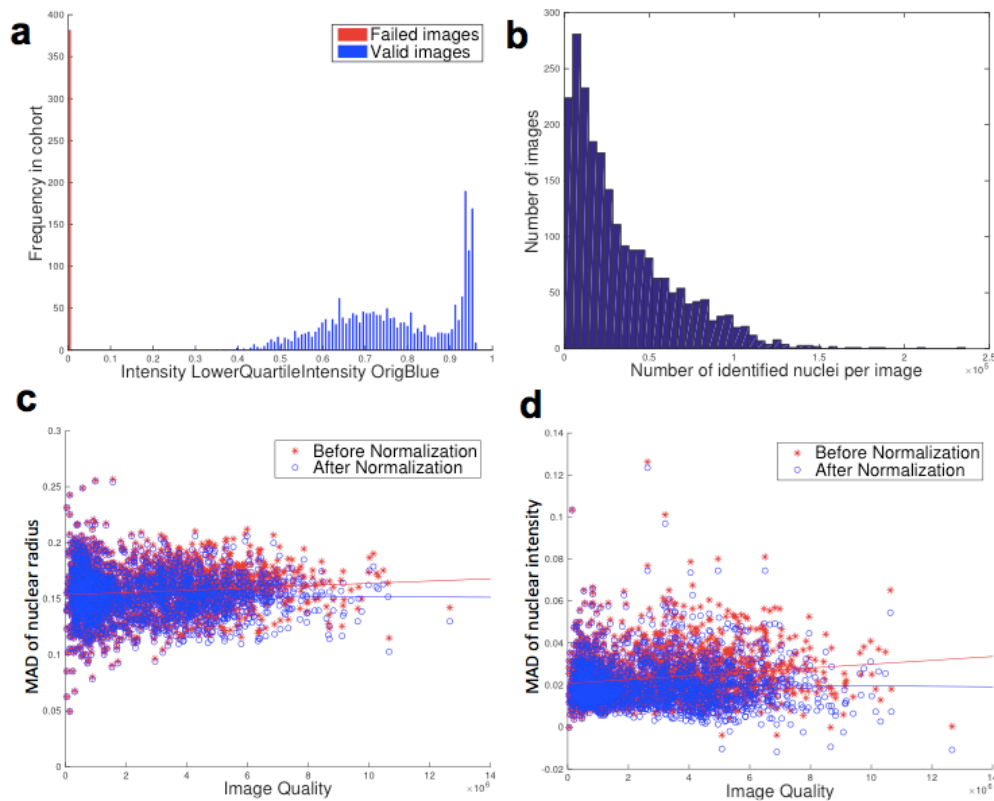

### Supplementary Figure 2.5

**Automated H&E image analysis.** (a) Distribution of the lower quartile of pixel intensities per image measured across 2,613 images. Failed images (red) were excluded from further analysis. (b) The number of nuclei identified per each valid image. (c-d) Normalization of intra-tumor nuclear diversity measures by image quality. (c) Dependence of nuclear size diversity (y-axis) on image quality (x-axis; measured as mean of *AreaOccupied\_TotalArea\_ThreshBlue* and *AreaOccupied\_Perimeter\_ThreshBlue*). (d) Dependence of nuclear intensity diversity (y-axis) on image quality (x-axis; measured as mean of *Intensity\_TotalArea\_OrigBlue* and *Intensity\_TotalIntensity\_OrigRed*). All four image-quality measures are defined in the CellProfiler<sup>6</sup> manual.

1. TCGA-CF-A47W-01Z-00-DX1

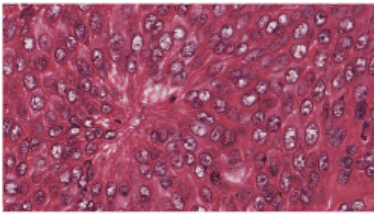

2. TCGA-GU-A42R-01Z-00-DX1

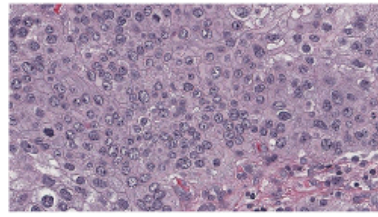

3. TCGA-FD-A35O-01Z-00-DX1

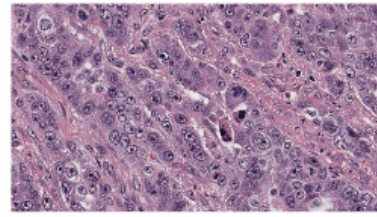

4. TCGA-G2-A2EK-01Z-00-DX3

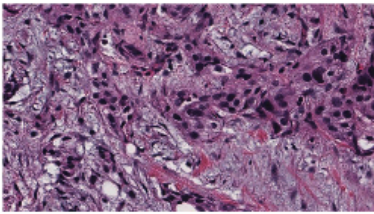

5. TCGA-E5-A2PC-01Z-00-DX1

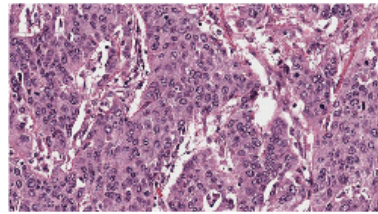

6. TCGA-FD-A5BY-01Z-00-DX1

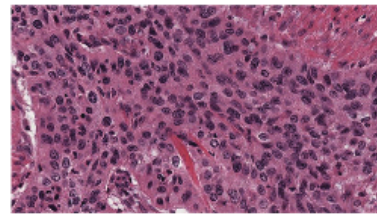

7. TCGA-GD-A3OS-01Z-00-DX1

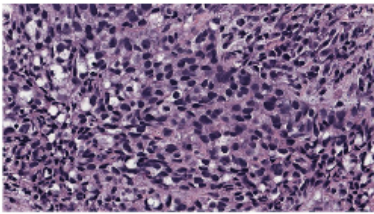

8. TCGA-CU-A0YR-01A-01-TS1

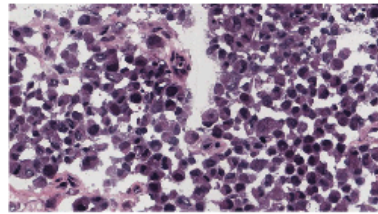

9. TCGA-G2-A2EJ-01Z-00-DX4

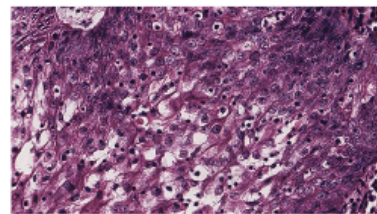

10. TCGA-GC-A3I6-01Z-00-DX1

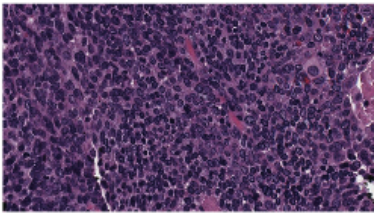

11. TCGA-CF-A3MG-01Z-00-DX1

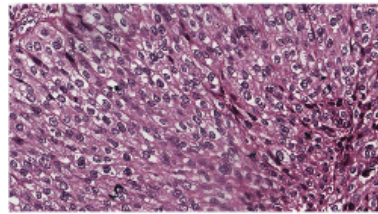

12. TCGA-GV-A40E-01Z-00-DX1

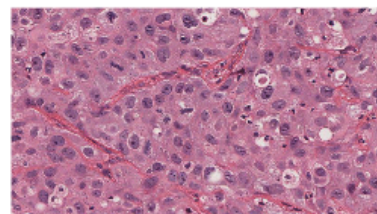

13. TCGA-FJ-A3Z7-01Z-00-DX1

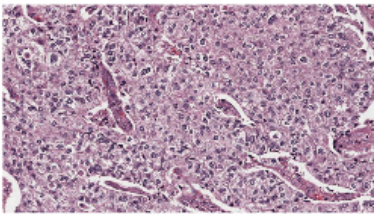

14. TCGA-GV-A3JW-01Z-00-DX1

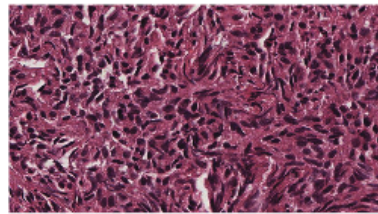

15. TCGA-FJ-A3ZF-01Z-00-DX1

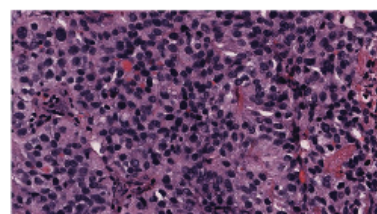

16. TCGA-C4-A0F0-01Z-00-DX1

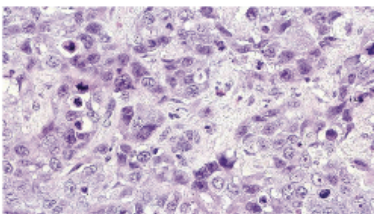

17. TCGA-BT-A0YX-01Z-00-DX1

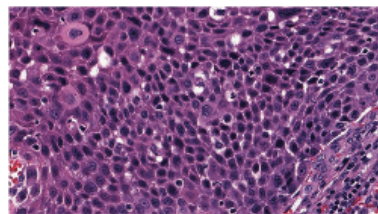

### Supplementary Figure 2.6

**Histopathologic evaluation of nuclear ITH measures obtained from automated H&E image analysis.** A subset of 17 bladder adenocarcinomas, representative of the full interval of nuclear ITH measured with automated H&E image analysis, was randomly selected. One representative H&E image was examined for each tumor by a histopathologist (MJ) and images were ranked according to ITH in nuclear intensity. Shown are representative regions from each image, sorted according to their histopathologic nuclear ITH ranking (from 1 – least diverse to 17 – most diverse).

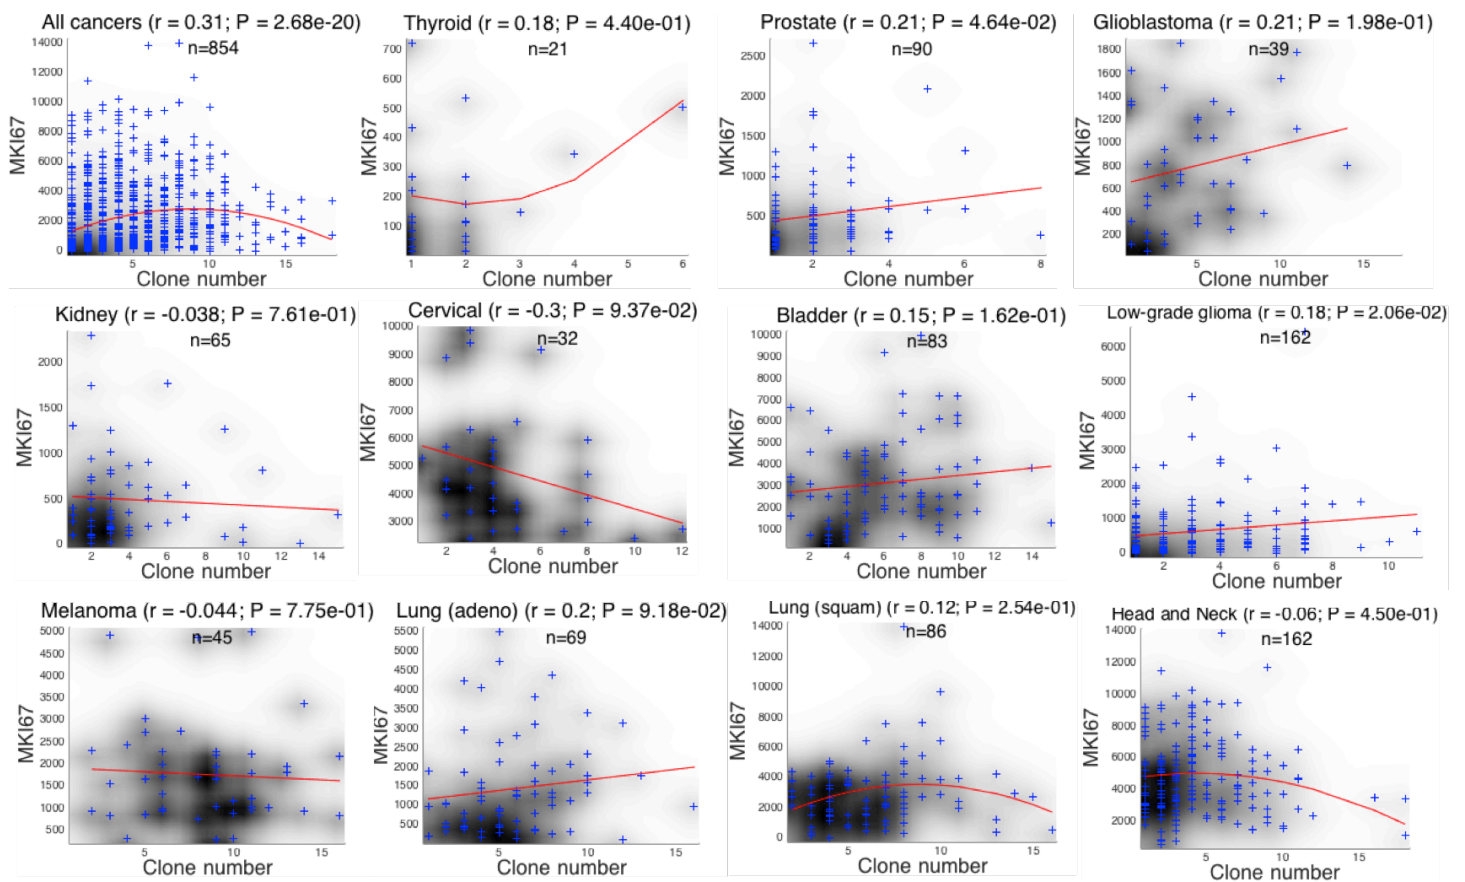

**Supplementary Figure 2.7**

**Relation between clone number and MKI67 expression.** For the majority of cancer types, an increase in clone number is accompanied by an increase in MKI67 expression. For a subset of cancer types, in particular those with a very high absolute proliferation rate (the two squamous carcinomas of head and neck and lung), we observe a non-linear relation: tumors with an intermediate number of clones have the highest MKI67 expression, while very heterogeneous tumors (>8 clones) have decreased MKI67 expression. Two alternative models, a linear and a quadratic regression, were fit to model the association between clone number (detected by EXPANDS) and MKI67 mRNA expression. For each cancer type, the model that provided the best fit, as measured by the adjusted  $R^2$ , is shown. The Spearman rank correlation coefficient is displayed along with its p-value at the top of each panel. **[Quantification of proliferation rate by MKI67 expression: MKI67 mRNA expression was measured by RNA-sequencing, available for 854 tumors (73%). RNA-sequencing data was produced by the University of North Carolina (unc.edu) Cancer Genomic Characterization Center (CGCC) using the Illumina HiSeq 2000 RNA Sequencing Version 2 analysis platform. Expression was calculated at the gene level from RNA-sequencing data using the RSEM software package (RNA-Seq by Expectation-Maximization). RSEM expression estimates were normalized to set the upper quartile count at 1000. The interpreted data (level 3) was downloaded from the TCGA data portal.]**

### 3. Mutation accumulation, intra-tumor nuclear heterogeneity and intra-tumor genetic heterogeneity: data integration

Supplementary Table 3.1

**Mean size of clones carrying *CAN*-gene mutations.** For each *CAN*-gene *G*, the average size of clones with non-silent mutations in *G* was calculated among all mutated tumors across 12 cancer types. A total of 259 cancer driver genes (*CAN*-genes) were classified according to their SNV occurrence in large-size (upper quartile), medium-size (interquartile range) and small-size (lower quartile) clones and annotated with the functional clustering program DAVID (Supplementary Table 3.4).

| Gene Rank | CAN-Gene | Average clone size (EXPANDS) | Average clone size (PyClone) |
|-----------|----------|------------------------------|------------------------------|
| 1         | CDKN1B   | 86.2                         | 78.4                         |
| 2         | KRAS     | 85.5                         | 73.8                         |
| 3         | CDKN2A   | 84.9                         | 76.1                         |
| 4         | VHL      | 84.8                         | 75.6                         |
| 5         | SDC1     | 84.3                         | 85.2                         |
| 6         | FSCN1    | 84.3                         | 63.9                         |
| 7         | CCL2     | 82.7                         | 83.3                         |
| 8         | TERF1    | 82.0                         | 72.1                         |
| 9         | EDN3     | 81.8                         | 71.4                         |
| 10        | BRAF     | 81.3                         | 75.1                         |
| 11        | TP53     | 81.1                         | 74.6                         |
| 12        | WNT5A    | 81.0                         | 71.8                         |
| 13        | NCOA3    | 80.7                         | 71.5                         |
| 14        | TERT     | 79.7                         | 84.2                         |
| 15        | PTEN     | 79.3                         | 72.4                         |
| 16        | PLAT     | 78.9                         | 76.5                         |
| 17        | GPI      | 78.6                         | 73.2                         |
| 18        | CADM1    | 78.4                         | 76.0                         |
| 19        | ITGA2    | 78.3                         | 61.0                         |
| 20        | CYP1A2   | 78.0                         | 77.9                         |
| 21        | SOD2     | 77.8                         | 71.3                         |
| 22        | TAP2     | 77.7                         | 69.9                         |
| 23        | SERPINA3 | 77.7                         | 66.5                         |
| 24        | DNTT     | 77.2                         | 76.2                         |
| 25        | TOP2A    | 76.8                         | 79.3                         |
| 26        | RB1      | 76.8                         | 73.5                         |
| 27        | CTNNB1   | 76.6                         | 72.1                         |
| 28        | CD34     | 76.6                         | 68.1                         |



|    |        |      |      |
|----|--------|------|------|
| 29 | VIM    | 76.5 | 71.3 |
| 30 | TOP1   | 76.4 | 68.9 |
| 31 | PIK3CA | 76.3 | 69.7 |
| 32 | CD44   | 76.1 | 76.1 |
| 34 | STAT2  | 75.8 | 74.5 |
| 33 | KRT18  | 75.6 | 69.9 |
| 35 | TSG101 | 75.3 | NA   |
| 38 | SMAD4  | 75.3 | 66.6 |
| 37 | PIK3CB | 75.2 | 65.3 |
| 36 | PTGER4 | 74.9 | NA   |
| 41 | ING1   | 74.9 | 67.5 |
| 39 | RHOA   | 74.8 | 66.9 |
| 40 | NF1    | 74.7 | 71.9 |
| 42 | NBN    | 74.7 | 69.7 |
| 43 | CTSB   | 74.7 | 68.1 |
| 44 | CD82   | 74.6 | 74.0 |
| 45 | SPINT2 | 74.4 | 83.0 |
| 46 | BRCA2  | 74.3 | 73.6 |
| 47 | GFAP   | 74.3 | 65.4 |
| 48 | CCNE1  | 74.2 | 78.8 |
| 49 | TEK    | 74.1 | 66.4 |
| 50 | EGR1   | 73.8 | 69.3 |
| 51 | LAMA5  | 73.7 | 68.8 |
| 52 | AKT1   | 73.6 | 77.6 |
| 53 | TCF7L2 | 73.6 | 70.7 |
| 54 | CP     | 73.6 | 66.7 |
| 56 | ANXA2  | 73.6 | 66.1 |
| 55 | CYP4B1 | 73.6 | 62.6 |
| 57 | XRCC1  | 73.5 | 64.2 |
| 58 | MME    | 73.4 | 72.6 |
| 59 | AXL    | 73.0 | 74.0 |
| 60 | PARP1  | 73.0 | 68.6 |
| 61 | PTCH1  | 72.9 | 69.8 |
| 62 | ALCAM  | 72.9 | 64.2 |
| 63 | FGFR4  | 72.6 | 69.0 |
| 64 | SMAD2  | 72.5 | 67.7 |
| 65 | MET    | 72.4 | 68.7 |
| 66 | MCL1   | 72.3 | 66.2 |
| 67 | HIF1A  | 72.2 | 83.0 |

|     |         |      |      |
|-----|---------|------|------|
| 68  | CTTN    | 72.2 | 73.8 |
| 69  | ABCB1   | 72.2 | 71.2 |
| 71  | PPARG   | 72.1 | 73.5 |
| 70  | CDH17   | 72.1 | 67.9 |
| 72  | MPO     | 72.0 | 74.3 |
| 73  | COL18A1 | 71.8 | 68.7 |
| 76  | MUC4    | 71.7 | 70.8 |
| 75  | SLC2A1  | 71.6 | NA   |
| 74  | CDKN1A  | 71.6 | 83.2 |
| 77  | HPN     | 71.5 | NA   |
| 78  | ERBB2   | 71.4 | 69.1 |
| 80  | CCKBR   | 71.4 | 68.0 |
| 79  | NRAS    | 71.4 | 66.6 |
| 81  | MUC16   | 71.3 | 67.2 |
| 82  | A2M     | 71.2 | 71.9 |
| 84  | FGFR3   | 71.0 | 70.7 |
| 83  | PTPRC   | 71.0 | 66.9 |
| 85  | PTGS1   | 71.0 | 66.6 |
| 86  | HLA-B   | 71.0 | 59.1 |
| 87  | IL1RN   | 70.7 | 70.1 |
| 88  | PRDM2   | 70.7 | 68.1 |
| 89  | VIP     | 70.7 | 64.0 |
| 90  | CAV1    | 70.6 | 78.4 |
| 92  | CCND3   | 70.6 | 69.4 |
| 91  | SRC     | 70.6 | 63.7 |
| 93  | IGF1R   | 70.4 | 73.8 |
| 94  | MDM2    | 70.4 | 68.2 |
| 95  | NOS3    | 70.4 | 64.8 |
| 97  | VWF     | 70.3 | 71.7 |
| 98  | CLU     | 70.3 | 63.7 |
| 100 | SULT1A1 | 70.2 | 75.3 |
| 96  | DDC     | 70.1 | 68.4 |
| 99  | PRKCA   | 70.1 | 68.4 |
| 101 | STAT3   | 69.8 | 72.4 |
| 102 | MMP14   | 69.8 | 66.1 |
| 103 | NCAM1   | 69.8 | 66.1 |
| 104 | SDHD    | 69.7 | 66.1 |
| 105 | ITGAL   | 69.5 | 70.2 |
| 106 | KRT20   | 69.4 | 73.6 |

|     |          |      |      |
|-----|----------|------|------|
| 107 | THBS1    | 69.3 | 74.7 |
| 108 | MAP2K4   | 69.3 | 63.0 |
| 109 | SERPINB5 | 69.3 | 60.6 |
| 110 | DPP4     | 69.2 | 78.8 |
| 111 | CDH1     | 69.1 | 69.4 |
| 112 | SYK      | 69.0 | NA   |
| 113 | CA9      | 69.0 | 72.6 |
| 114 | TP63     | 68.9 | 75.4 |
| 115 | HSPA4    | 68.9 | 70.6 |
| 116 | AGTR1    | 68.9 | 66.5 |
| 117 | VCAN     | 68.9 | 65.2 |
| 118 | ACTB     | 68.9 | 61.6 |
| 120 | XDH      | 68.8 | 62.0 |
| 119 | MLH1     | 68.7 | 74.1 |
| 121 | JUP      | 68.7 | 73.7 |
| 122 | DLC1     | 68.7 | 67.9 |
| 123 | OGG1     | 68.6 | 69.7 |
| 124 | STAT1    | 68.6 | 66.7 |
| 125 | KRT8     | 68.6 | 65.9 |
| 126 | ABL1     | 68.6 | 65.1 |
| 127 | AHR      | 68.5 | NA   |
| 128 | LRP1     | 68.5 | 70.3 |
| 129 | KRT5     | 68.5 | 68.8 |
| 130 | HLA-G    | 68.5 | 66.3 |
| 132 | ERBB3    | 68.4 | 74.7 |
| 131 | NOS1     | 68.4 | 69.4 |
| 133 | FLT4     | 68.4 | 63.9 |
| 135 | TSHR     | 68.4 | 63.0 |
| 134 | MTHFR    | 68.3 | 64.6 |
| 136 | ERCC2    | 68.1 | 77.6 |
| 137 | EGF      | 68.1 | 72.1 |
| 139 | KDR      | 68.1 | 70.6 |
| 138 | EPHA2    | 68.1 | 62.8 |
| 140 | SMARCA4  | 68.0 | 72.3 |
| 141 | EGFR     | 68.0 | 65.1 |
| 142 | CYP1A1   | 67.8 | NA   |
| 143 | ANGPT2   | 67.7 | 67.6 |
| 144 | FLT1     | 67.7 | 66.1 |
| 145 | MKI67    | 67.6 | 72.6 |

|     |         |      |      |
|-----|---------|------|------|
| 146 | APC     | 67.6 | 65.1 |
| 147 | HSPA1A  | 67.5 | 66.1 |
| 148 | DAPK1   | 67.4 | 71.1 |
| 149 | PKHD1   | 67.4 | 69.6 |
| 150 | NOTCH1  | 67.4 | 63.8 |
| 151 | NTRK1   | 67.3 | 69.8 |
| 154 | EPHB4   | 67.3 | 68.9 |
| 152 | DPYD    | 67.3 | 67.8 |
| 153 | PTHLH   | 67.3 | 58.6 |
| 155 | MMP11   | 67.2 | 74.5 |
| 156 | IL4R    | 67.2 | 68.8 |
| 157 | LZTS1   | 67.2 | 68.4 |
| 158 | BUB1    | 67.2 | 53.0 |
| 159 | TNF     | 66.9 | 77.6 |
| 160 | MMP9    | 66.8 | 68.3 |
| 161 | ENPEP   | 66.7 | NA   |
| 162 | MTA1    | 66.7 | 76.1 |
| 163 | ETS2    | 66.7 | 68.9 |
| 164 | CEACAM5 | 66.7 | 64.9 |
| 165 | AFP     | 66.6 | NA   |
| 166 | ABCC1   | 66.6 | 65.8 |
| 167 | DCC     | 66.4 | 67.0 |
| 168 | GLI1    | 66.3 | 70.5 |
| 169 | NAT2    | 66.3 | 69.5 |
| 170 | SART3   | 66.3 | 61.1 |
| 171 | PGR     | 66.1 | 59.4 |
| 172 | REG4    | 66.0 | 63.0 |
| 173 | ITGB2   | 65.9 | 68.2 |
| 174 | ANPEP   | 65.8 | 72.3 |
| 177 | CDH3    | 65.8 | 68.0 |
| 176 | MYB     | 65.8 | 67.0 |
| 175 | HSPG2   | 65.8 | 65.5 |
| 178 | EDNRB   | 65.6 | 73.2 |
| 179 | SLC2A3  | 65.5 | 75.2 |
| 180 | CTSD    | 65.5 | 68.3 |
| 182 | APAF1   | 65.4 | NA   |
| 181 | ENO2    | 65.3 | 80.3 |
| 183 | PIK3CG  | 65.3 | 75.5 |
| 184 | GNAS    | 65.3 | 63.3 |

|     |          |      |      |
|-----|----------|------|------|
| 185 | MAPK1    | 65.2 | 71.8 |
| 186 | DBC1     | 65.2 | 68.7 |
| 187 | MVP      | 65.1 | 65.7 |
| 188 | WT1      | 65.1 | 58.6 |
| 189 | KRT7     | 65.1 | 58.0 |
| 190 | MUC6     | 65.0 | 60.1 |
| 191 | PTGS2    | 64.7 | 69.5 |
| 192 | CDC73    | 64.6 | NA   |
| 193 | TSC1     | 64.6 | 68.6 |
| 194 | MUC2     | 64.6 | 66.1 |
| 195 | CHFR     | 64.4 | NA   |
| 196 | RET      | 64.4 | 70.2 |
| 197 | IL15     | 64.4 | 66.3 |
| 198 | TRPM1    | 64.3 | 68.7 |
| 199 | PLAUR    | 64.3 | 60.0 |
| 200 | DMBT1    | 64.1 | 65.2 |
| 201 | XRCC5    | 64.0 | 66.1 |
| 202 | FGFR2    | 64.0 | 66.0 |
| 203 | UMPS     | 63.9 | NA   |
| 204 | NOS2     | 63.8 | 69.4 |
| 205 | HDC      | 63.8 | 65.3 |
| 206 | TG       | 63.8 | 65.1 |
| 207 | MT3      | 63.8 | 64.2 |
| 208 | MC2R     | 63.7 | 75.4 |
| 209 | HGF      | 63.7 | 58.6 |
| 210 | ANGPT1   | 63.6 | 61.2 |
| 211 | MSH6     | 63.4 | 59.0 |
| 212 | TGFB1    | 63.3 | 66.7 |
| 213 | MUC5B    | 63.2 | 74.0 |
| 214 | FAP      | 63.2 | 66.5 |
| 215 | VCAM1    | 63.1 | 65.5 |
| 216 | ENPP2    | 63.0 | 72.8 |
| 217 | HSP90AA1 | 62.9 | 73.8 |
| 218 | GSTP1    | 62.8 | NA   |
| 219 | CD86     | 62.6 | 72.3 |
| 220 | NQO1     | 62.5 | 59.4 |
| 221 | BAX      | 62.3 | 70.9 |
| 222 | VEGFA    | 62.2 | 59.7 |
| 223 | NRP1     | 62.2 | 58.5 |

|     |          |      |      |
|-----|----------|------|------|
| 224 | CD55     | 62.1 | NA   |
| 225 | BRCA1    | 62.1 | 68.5 |
| 226 | IGHG3    | 62.1 | 62.0 |
| 227 | MUC3A    | 62.0 | 58.8 |
| 228 | RUNX2    | 61.9 | NA   |
| 229 | ZBTB16   | 61.8 | 69.8 |
| 230 | ESR2     | 61.7 | 70.1 |
| 231 | FASN     | 61.7 | 66.0 |
| 232 | INSR     | 61.7 | 61.7 |
| 233 | FGF2     | 61.3 | NA   |
| 234 | HLA-A    | 60.9 | 60.5 |
| 235 | MMP2     | 60.8 | 66.0 |
| 236 | KCNH2    | 60.6 | 55.9 |
| 237 | LTF      | 60.5 | 67.6 |
| 238 | EZH2     | 60.4 | 71.8 |
| 239 | RARB     | 59.6 | 70.4 |
| 240 | TFAP2A   | 59.5 | 61.2 |
| 241 | HSP90B1  | 59.3 | 60.9 |
| 242 | CDC25A   | 59.3 | 57.7 |
| 243 | CHEK2    | 59.1 | 60.9 |
| 244 | CDC25B   | 59.0 | 66.8 |
| 245 | ICAM1    | 58.3 | 61.8 |
| 246 | BMP6     | 57.7 | 62.5 |
| 247 | MYC      | 57.7 | 59.2 |
| 248 | XPA      | 57.3 | NA   |
| 249 | EPO      | 57.1 | 88.8 |
| 250 | TP73     | 56.7 | 71.6 |
| 251 | NFKB1    | 56.7 | 64.0 |
| 252 | HMMR     | 56.6 | NA   |
| 253 | MUTYH    | 54.9 | 53.6 |
| 254 | GJA1     | 53.8 | 71.6 |
| 255 | MUC5AC   | 52.5 | 52.3 |
| 256 | FOLH1    | 52.4 | 58.4 |
| 257 | PLK1     | 51.9 | 65.9 |
| 258 | TNFRSF1A | 51.0 | 55.1 |
| 259 | MAD2L1   | 38.8 | 31.9 |

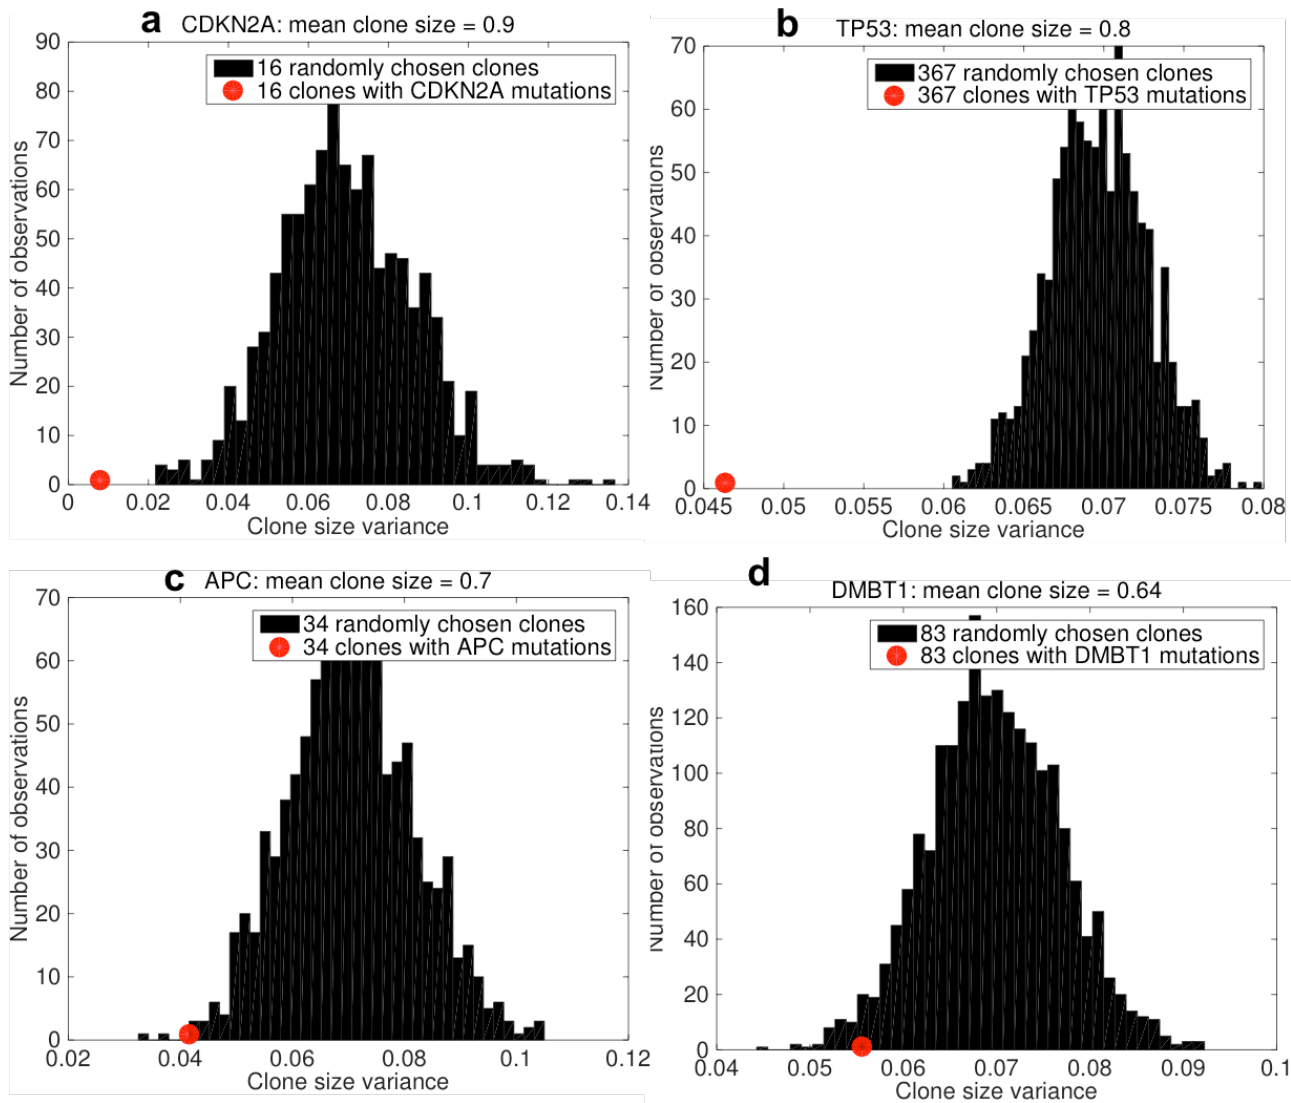

**Supplementary Figure 3.2**

**CAN-gene mutations occur in clones of specific, CAN-gene dependent size-ranges.** The variance in the size of clones with mutations in *CAN*-genes was calculated and compared to the size-variance of clones randomly selected from the cohort of all 5,423 clones detected by EXPANDS across 1,165 tumor samples. Clone sizes were normalized by tumor purity. The clone-size variances of 2,000 randomly selected clone-sets is significantly higher than the size variance of clones harboring **(a)** CDKN2A mutations (t-test:  $P=0.001$ ), **(b)** TP53 mutations (t-test:  $P=1.21E-10$ ), **(c)** APC mutations (t-test:  $P=0.026$ ) and **(d)** DMBT1 mutations (t-test:  $P=0.022$ ). The same procedure was performed for all 259 *CAN*-genes.

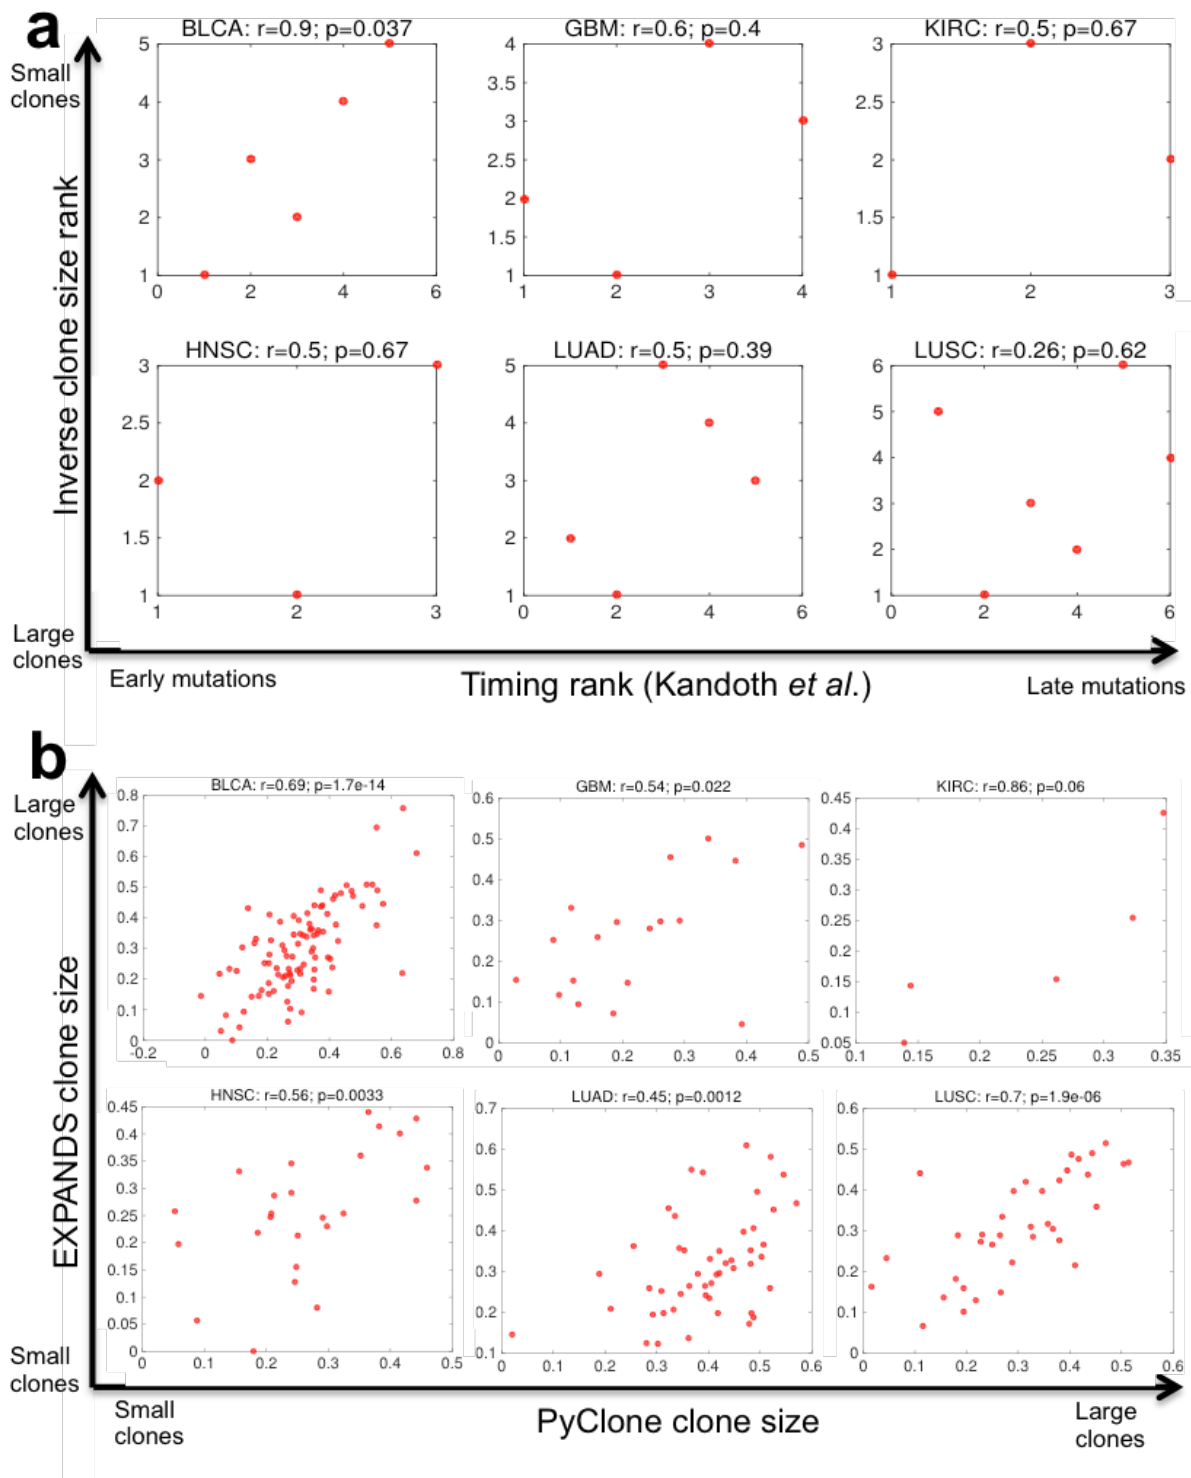

### Supplementary Figure 3.3

**Different approaches infer similar sizes for clones with CAN-gene mutations.** (a) The size of clones with mutations in cancer driver genes (*CAN*-genes) correlates to the relative order of *CAN*-gene mutations reported by Kandath *et al.* Correlation between mutation timing rank predicted by Kandath *et al.* (x-axis) and inverse clone size rank of *CAN*-genes estimated based on EXPANDS results in this study (y-axis). (b) The size of clones with cancer driver gene mutations predicted by PyClone (x-axis) and EXPANDS (y-axis). Pearson correlation coefficients ( $r$ ) are shown.



### Supplementary Table 3.4

**Annotation clustering of *CAN*-genes stratified by mutated clone sizes.** Mutually exclusive pathways (from BIOCARTA and KEGG databases: prefix *h\_tel* pathway, *hsa*), gene ontologies (prefix *GO*) and protein domains (INTERPRO database: prefix *IPR*) enriched either among cancer driver genes (*CAN*-genes) harboring mutations in large clones (upper quartile) or among *CAN*-genes with mutations in small- and medium-sized clones (lower three quartiles). The top-20 enriched entities are shown for each of the two clone size categories.

| Enriched Term                                                               | <i>CAN</i> -gene size category | Gene count | <i>P</i> -Value | FDR      |
|-----------------------------------------------------------------------------|--------------------------------|------------|-----------------|----------|
| hsa05200:Pathways in cancer                                                 | Large                          | 23         | 1.92E-14        | 2.10E-11 |
| hsa05212:Pancreatic cancer                                                  | Large                          | 11         | 7.26E-10        | 7.93E-07 |
| hsa05210:Colorectal cancer                                                  | Large                          | 11         | 3.44E-09        | 3.76E-06 |
| GO:0008285~negative regulation of cell proliferation                        | Large                          | 14         | 7.15E-09        | 1.19E-05 |
| GO:0007568~aging                                                            | Large                          | 9          | 3.47E-08        | 5.78E-05 |
| hsa05222:Small cell lung cancer                                             | Large                          | 10         | 5.89E-08        | 6.43E-05 |
| GO:0040008~regulation of growth                                             | Large                          | 12         | 3.58E-07        | 0.001    |
| GO:0042493~response to drug                                                 | Large                          | 10         | 5.56E-07        | 0.001    |
| GO:0001666~response to hypoxia                                              | Large                          | 8          | 2.50E-06        | 0.004    |
| GO:0070482~response to oxygen levels                                        | Large                          | 8          | 3.51E-06        | 0.006    |
| GO:0001889~liver development                                                | Large                          | 6          | 4.16E-06        | 0.007    |
| GO:0007050~cell cycle arrest                                                | Large                          | 7          | 7.32E-06        | 0.012201 |
| GO:0007569~cell aging                                                       | Large                          | 5          | 1.48E-05        | 0.024682 |
| GO:0051130~positive regulation of cellular component organization           | Large                          | 8          | 1.81E-05        | 0.030107 |
| GO:0008134~transcription factor binding                                     | Large                          | 12         | 2.29E-05        | 0.030181 |
| GO:0008283~cell proliferation                                               | Large                          | 11         | 2.61E-05        | 0.043541 |
| hsa05211:Renal cell carcinoma                                               | Large                          | 7          | 4.26E-05        | 0.04655  |
| h_telPathway:Telomeres, Telomerase, Cellular Aging, and Immortality         | Large                          | 6          | 7.50E-05        | 0.08685  |
| hsa04510:Focal adhesion                                                     | Large                          | 10         | 8.64E-05        | 0.094363 |
| IPR001357:BRCT                                                              | Large                          | 4          | 1.03E-04        | 0.134645 |
| GO:0044093~positive regulation of molecular function                        | Small, Medium                  | 38         | 5.90E-15        | 1.04E-11 |
| IPR008266:Tyrosine protein kinase, active site                              | Small, Medium                  | 17         | 1.67E-14        | 2.47E-11 |
| GO:0043085~positive regulation of catalytic activity                        | Small, Medium                  | 35         | 3.18E-14        | 5.63E-11 |
| GO:0004714~transmembrane receptor protein tyrosine kinase activity          | Small, Medium                  | 15         | 3.01E-13        | 4.35E-10 |
| IPR001245:Tyrosine protein kinase                                           | Small, Medium                  | 17         | 3.97E-13        | 5.84E-10 |
| GO:0007169~transmembrane receptor protein tyrosine kinase signaling pathway | Small, Medium                  | 23         | 5.57E-13        | 9.87E-10 |
| hsa05219:Bladder cancer                                                     | Small, Medium                  | 15         | 1.51E-12        | 1.75E-09 |
| GO:0010604~positive regulation of macromolecule metabolic process           | Small, Medium                  | 42         | 1.77E-12        | 3.14E-09 |
| GO:0040012~regulation of locomotion                                         | Small, Medium                  | 21         | 2.25E-12        | 3.98E-09 |
| GO:0016477~cell migration                                                   | Small, Medium                  | 24         | 5.05E-12        | 8.94E-09 |
| GO:0040017~positive regulation of locomotion                                | Small, Medium                  | 16         | 5.30E-12        | 9.39E-09 |
| GO:0048514~blood vessel morphogenesis                                       | Small, Medium                  | 21         | 1.30E-11        | 2.30E-08 |
| GO:0004713~protein tyrosine kinase activity                                 | Small, Medium                  | 19         | 1.41E-11        | 2.05E-08 |
| GO:0030335~positive regulation of cell migration                            | Small, Medium                  | 15         | 1.89E-11        | 3.35E-08 |
| GO:0030334~regulation of cell migration                                     | Small, Medium                  | 19         | 2.05E-11        | 3.64E-08 |
| GO:0051674~localization of cell                                             | Small, Medium                  | 24         | 4.45E-11        | 7.88E-08 |
| GO:0048870~cell motility                                                    | Small, Medium                  | 24         | 4.45E-11        | 7.88E-08 |
| GO:0051272~positive regulation of cell motion                               | Small, Medium                  | 15         | 7.26E-11        | 1.29E-07 |
| GO:0008629~induction of apoptosis by intracellular signals                  | Small, Medium                  | 12         | 1.59E-10        | 2.81E-07 |
| GO:0044459~plasma membrane part                                             | Small, Medium                  | 67         | 2.09E-10        | 2.81E-07 |

### Supplementary Table 3.5

**Nuclear ITH accompanies genetic ITH across cancers.** Spearman rank correlation coefficients between intratumoral nuclear diversity and clone number predicted by PyClone (left) and EXPANDS (center) displayed for each cancer type. Positive association between nuclear and genetic ITH persists after taking into account the dependency of both ITH measures on tumor purity (right), suggesting that the observation cannot be explained by a common influence of tumor purity on these ITH measures (see also **Fig. 4** and **Supplementary Figure 2.3**). Unadjusted p-values are shown.

|                         | PyClone                          |         | EXPANDS                          |          | EXPANDS (purity normalized)      |          |
|-------------------------|----------------------------------|---------|----------------------------------|----------|----------------------------------|----------|
|                         | Spearman correlation coefficient | P-value | Spearman correlation coefficient | P-value  | Spearman correlation coefficient | P-value  |
| <b>All cancers</b>      | 0.012                            | 0.712   | 0.243                            | 6.27E-14 | 0.224                            | 4.90E-12 |
| <b>Stomach</b>          | 0.101                            | 0.331   | 0.406                            | 4.56E-05 | 0.381                            | 1.40E-04 |
| <b>Kidney</b>           | 0.173                            | 0.202   | 0.413                            | 0.001    | 0.385                            | 0.002    |
| <b>Head and Neck</b>    | 0.261                            | 0.005   | 0.278                            | 0.003    | 0.266                            | 0.004    |
| <b>Bladder</b>          | 0.032                            | 0.738   | 0.246                            | 0.009    | 0.249                            | 0.008    |
| <b>Glioblastoma</b>     | 0.150                            | 0.192   | 0.247                            | 0.029    | 0.149                            | 0.192    |
| <b>Melanoma</b>         | 0.158                            | 0.264   | 0.219                            | 0.115    | 0.215                            | 0.122    |
| <b>Low-grade glioma</b> | 0.236                            | 0.015   | 0.125                            | 0.168    | 0.098                            | 0.279    |
| <b>Prostate</b>         | 0.067                            | 0.626   | -0.081                           | 0.538    | -0.087                           | 0.509    |
| <b>Thyroid</b>          | -0.171                           | 0.255   | -0.055                           | 0.676    | 0.073                            | 0.581    |
| <b>Cervical</b>         | 0.226                            | 0.205   | -0.075                           | 0.680    | 0.033                            | 0.857    |
| <b>Lung (squam)</b>     | -0.362                           | 0.002   | -0.042                           | 0.734    | -0.069                           | 0.574    |
| <b>Lung (adeno)</b>     | -0.107                           | 0.373   | 0.029                            | 0.813    | 0.036                            | 0.764    |

## 4. Identification of cancer type dependent and universal biomarkers of progression free and overall survival

### Supplementary Table 4.1

Definition of covariates used during univariate Cox analysis. MAD := median absolute deviation.

| Covariate                        | Description                                                                                             |
|----------------------------------|---------------------------------------------------------------------------------------------------------|
| 1 amplification abundance        | Fraction of tumor metagenome affected by gains or amplifications (deviation from diploid $\geq +0.25$ ) |
| 2 cnv abundance                  | Fraction of tumor metagenome affected by CNVs (absolute deviation from diploid $\geq 0.25$ )            |
| 3 deletion abundance             | Fraction of tumor metagenome affected by single copy losses (deviation from diploid $\leq -0.25$ )      |
| 4 extreme CNV abundance          | $\log  \text{CNV abundance} - \text{mean CNV abundance} $                                               |
| 5 extreme SNV abundance          | $ \text{SNV abundance} - \text{mean SNV abundance} $                                                    |
| 6 progression Index              | Minimum clone size associated with observed CAN-gene mutations, subtracted from 1                       |
| 7 snv abundance                  | Count of somatic SNVs                                                                                   |
| 8 Clone number                   | Number of clones (predicted by EXPANDS or PyClone)                                                      |
| 9 Purity normalized clone number | Number of clones normalized to take into account tumor purity                                           |
| 10 Nuclear diversity rank        | Histopathological intra-tumor diversity measured as MAD of nuclear intensity and size                   |
| 11 MKI67 expression              | Proliferation rate as measured by KI67 mRNA expression                                                  |

## Supplementary Table 4.2

**Prognostic significance of genomic instability measures across cancers.** P-values and hazard ratios from univariate Cox models. P-values below 0.05 are marked blue. The magnitude of the hazard ratio is color-coded (yellow: favorable outcome; red: poor outcome; gray: moderate effect). Where variables did not satisfy the proportionality assumption for the Cox model ( $P < 0.05$ ), the corresponding hazard ratios are flagged (\*). Two clinical endpoints are shown: **(a)** overall survival and **(b)** progression-free survival.

**a**

|                                              |                         | low/high<br>SNV<br>abundance | low/high<br>CNV<br>abundance | SNV<br>abundance | CNV<br>abundance | deletion<br>abundance | amplification<br>abundance |
|----------------------------------------------|-------------------------|------------------------------|------------------------------|------------------|------------------|-----------------------|----------------------------|
| All cancers<br>(including<br>PRAD &<br>THCA) | p-value (Cox)           | 0.07                         | 4.79E-08                     | 0.99             | 0.10             | 0.59                  | 0.26                       |
|                                              | corrected p-value (Cox) | 0.34                         | 6.71E-07                     | 0.99             | 0.45             | 0.82                  | 0.53                       |
|                                              | hazard ratio (Cox)      | 0.03                         | 0.15                         | 1.01             | 1.34             | 1.10                  | 1.20                       |
|                                              | # samples               | 1157                         | 1157                         | 1157             | 1157             | 1157                  | 1157                       |
| STAD                                         | p-value (Cox)           | 0.53                         | 0.11                         | 0.42             | 0.23             | 0.22                  | 0.01                       |
|                                              | corrected p-value (Cox) | 0.69                         | 0.22                         | 0.67             | 0.51             | 0.65                  | 0.11                       |
|                                              | hazard ratio (Cox)      | 0.21                         | 0.29                         | 0.14             | 1.99             | 0.56                  | 3.44                       |
|                                              | # samples               | 142                          | 142                          | 142              | 142              | 142                   | 142                        |
| GBM                                          | p-value (Cox)           | 0.39                         | 0.56                         | 0.06             | 0.59             | 0.48                  | 0.93                       |
|                                              | corrected p-value (Cox) | 0.69                         | 0.56                         | 0.38             | 0.70             | 0.78                  | 0.93                       |
|                                              | hazard ratio (Cox)      | 0.35                         | 1.66                         | 4.94             | 0.80             | 0.71                  | 1.04                       |
|                                              | # samples               | 103                          | 103                          | 103              | 103              | 103                   | 103                        |
| LGG                                          | p-value (Cox)           | 1.33E-04                     | 0.07                         | 0.10             | 0.08             | 0.50                  | 0.17                       |
|                                              | corrected p-value (Cox) | 9.33E-04                     | 0.22                         | 0.38             | 0.45             | 0.78                  | 0.49                       |
|                                              | hazard ratio (Cox)      | 0.00                         | 0.22                         | 8.22             | 2.23             | 1.52                  | 1.87                       |
|                                              | # samples               | 166                          | 166                          | 166              | 166              | 166                   | 166                        |
| Glioma<br>(GBM+LGG)                          | p-value (Cox)           | 2.83E-14                     | 1.36E-03                     | 4.98E-08         | 0.04             | 0.38                  | 0.14                       |
|                                              | corrected p-value (Cox) | 3.96E-13                     | 0.01                         | 6.97E-07         | 0.45             | 0.78                  | 0.49                       |
|                                              | hazard ratio (Cox)      | 0.00                         | 0.15                         | 14.85            | 1.78             | 1.37                  | 1.51                       |
|                                              | # samples               | 269                          | 269                          | 269              | 269              | 269                   | 269                        |
| KIRC                                         | p-value (Cox)           | 0.94                         | 0.16                         | 0.22             | 0.46             | 0.23                  | 0.76                       |
|                                              | corrected p-value (Cox) | 0.94                         | 0.27                         | 0.62             | 0.65             | 0.65                  | 0.82                       |
|                                              | hazard ratio (Cox)      | 0.89*                        | 45.03                        | 3.32             | 0.60             | 0.20                  | 1.24                       |
|                                              | # samples               | 65                           | 65                           | 65               | 65               | 65                    | 65                         |
| HNSC                                         | p-value (Cox)           | 0.40                         | 0.44                         | 0.62             | 0.22             | 0.50                  | 0.64                       |
|                                              | corrected p-value (Cox) | 0.69                         | 0.56                         | 0.67             | 0.51             | 0.78                  | 0.82                       |
|                                              | hazard ratio (Cox)      | 0.52                         | 0.68                         | 0.73             | 1.74             | 1.30                  | 1.20                       |
|                                              | # samples               | 165                          | 165                          | 165              | 165              | 165                   | 165                        |
| LUAD                                         | p-value (Cox)           | 0.37                         | 0.37                         | 0.30             | 0.29             | 0.07                  | 0.63                       |
|                                              | corrected p-value (Cox) | 0.69                         | 0.56                         | 0.67             | 0.51             | 0.49                  | 0.82                       |
|                                              | hazard ratio (Cox)      | 0.23                         | 0.41                         | 0.24             | 2.29             | 3.90                  | 0.69                       |
|                                              | # samples               | 77                           | 77                           | 77               | 77               | 77                    | 77                         |
| BLCA                                         | p-value (Cox)           | 0.21                         | 0.08                         | 0.11             | 0.37             | 0.75                  | 0.21                       |
|                                              | corrected p-value (Cox) | 0.69                         | 0.22                         | 0.38             | 0.57             | 0.86                  | 0.49                       |
|                                              | hazard ratio (Cox)      | 0.14                         | 0.14                         | 0.09             | 0.59             | 1.19                  | 0.51                       |
|                                              | # samples               | 114                          | 114                          | 114              | 114              | 114                   | 114                        |
| LUSC                                         | p-value (Cox)           | 0.64                         | 0.01                         | 0.60             | 0.29             | 0.11                  | 0.68                       |
|                                              | corrected p-value (Cox) | 0.69                         | 0.05                         | 0.67             | 0.51             | 0.52                  | 0.82                       |
|                                              | hazard ratio (Cox)      | 0.32                         | 0.11                         | 0.29             | 0.45             | 0.26                  | 1.34                       |
|                                              | # samples               | 85                           | 85                           | 85               | 85               | 85                    | 85                         |
| SKCM                                         | p-value (Cox)           | 0.61                         | 0.52                         | 0.62             | 0.99             | 0.04                  | 0.16                       |
|                                              | corrected p-value (Cox) | 0.69                         | 0.56                         | 0.67             | 0.99             | 0.49                  | 0.49                       |
|                                              | hazard ratio (Cox)      | 0.49                         | 0.46                         | 0.51             | 1.01             | 5.76                  | 0.36                       |
|                                              | # samples               | 54                           | 54                           | 54               | 54               | 54                    | 54                         |
| CESC                                         | p-value (Cox)           | 0.56                         | 0.11                         | 0.44             | 0.28             | 0.86                  | 0.11                       |
|                                              | corrected p-value (Cox) | 0.69                         | 0.22                         | 0.67             | 0.51             | 0.86                  | 0.49                       |
|                                              | hazard ratio (Cox)      | 0.14                         | 0.13                         | 0.01             | 3.30             | 0.78                  | 5.33                       |
|                                              | # samples               | 33                           | 33                           | 33               | 33               | 33                    | 33                         |

**b**

|                                              |                         | low/high<br>SNV<br>abundance | low/high<br>CNV<br>abundance | SNV<br>abundance | CNV<br>abundance | deletion<br>abundance | amplification<br>abundance |
|----------------------------------------------|-------------------------|------------------------------|------------------------------|------------------|------------------|-----------------------|----------------------------|
| All cancers<br>(including<br>PRAD &<br>THCA) | p-value (Cox)           | 0.02                         | 1.62E-06                     | 0.27             | 0.25             | 1.00                  | 0.27                       |
|                                              | corrected p-value (Cox) | 0.07                         | 2.27E-05                     | 0.63             | 0.73             | 1.00                  | 0.53                       |
|                                              | hazard ratio (Cox)      | 0.02                         | 0.21                         | 0.33             | 1.19             | 1.00                  | 1.17                       |
|                                              | # samples               | 1157                         | 1157                         | 1157             | 1157             | 1157                  | 1157                       |
| STAD                                         | p-value (Cox)           | 0.31                         | 0.30                         | 0.20             | 0.71             | 0.15                  | 0.04                       |
|                                              | corrected p-value (Cox) | 0.66                         | 0.53                         | 0.57             | 0.86             | 0.89                  | 0.53                       |
|                                              | hazard ratio (Cox)      | 0.06                         | 0.48                         | 0.04             | 1.19             | 0.55                  | 2.34                       |
|                                              | # samples               | 142                          | 142                          | 142              | 142              | 142                   | 142                        |
| GBM                                          | p-value (Cox)           | 0.37                         | 0.47                         | 4.38E-03         | 0.85             | 0.57                  | 0.47                       |
|                                              | corrected p-value (Cox) | 0.66                         | 0.68                         | 0.02             | 0.86             | 0.92                  | 0.60                       |
|                                              | hazard ratio (Cox)      | 0.38                         | 1.73                         | 11.26            | 1.07             | 0.77                  | 1.32                       |
|                                              | # samples               | 103                          | 103                          | 103              | 103              | 103                   | 103                        |
| LGG                                          | p-value (Cox)           | 0.01                         | 0.16                         | 3.48E-05         | 0.27             | 0.68                  | 0.39                       |
|                                              | corrected p-value (Cox) | 0.06                         | 0.31                         | 2.44E-04         | 0.73             | 0.92                  | 0.60                       |
|                                              | hazard ratio (Cox)      | 0.01                         | 0.36                         | 29.14            | 1.49             | 1.22                  | 1.37                       |
|                                              | # samples               | 166                          | 166                          | 166              | 166              | 166                   | 166                        |
| Glioma<br>(GBM+LGG)                          | p-value (Cox)           | 4.44E-15                     | 4.84E-04                     | 5.55E-16         | 0.05             | 0.38                  | 0.16                       |
|                                              | corrected p-value (Cox) | 6.22E-14                     | 3.39E-03                     | 7.77E-15         | *                | 0.64                  | 0.53                       |
|                                              | hazard ratio (Cox)      | 0.00                         | 0.16                         | 38.52            | 1.62             | 1.31                  | 1.41                       |
|                                              | # samples               | 269                          | 269                          | 269              | 269              | 269                   | 269                        |
| KIRC                                         | p-value (Cox)           | 0.74                         | 0.15                         | 0.43             | 0.86             | 0.28                  | 0.24                       |
|                                              | corrected p-value (Cox) | 0.74                         | 0.31                         | 0.63             | 0.86             | 0.89                  | 0.53                       |
|                                              | hazard ratio (Cox)      | 0.60                         | 23.23                        | 2.15             | 1.10             | 0.33                  | 2.01                       |
|                                              | # samples               | 65                           | 65                           | 65               | 65               | 65                    | 65                         |
| HNSC                                         | p-value (Cox)           | 0.15                         | 0.76                         | 0.32             | 0.11             | 0.69                  | 0.23                       |
|                                              | corrected p-value (Cox) | 0.42                         | 0.76                         | 0.63             | 0.73             | 0.92                  | 0.53                       |
|                                              | hazard ratio (Cox)      | 0.34                         | 0.87                         | 0.55             | 1.92             | 1.16                  | 1.52                       |
|                                              | # samples               | 165                          | 165                          | 165              | 165              | 165                   | 165                        |
| LUAD                                         | p-value (Cox)           | 0.59                         | 0.61                         | 0.64             | 0.31             | 0.33                  | 0.94                       |
|                                              | corrected p-value (Cox) | 0.66                         | 0.68                         | 0.70             | 0.73             | 0.89                  | 0.94                       |
|                                              | hazard ratio (Cox)      | 0.51                         | 0.67                         | 0.62             | 1.87             | 1.82                  | 1.05                       |
|                                              | # samples               | 77                           | 77                           | 77               | 77               | 77                    | 77                         |
| BLCA                                         | p-value (Cox)           | 0.13                         | 0.07                         | 0.07             | 0.72             | 0.76                  | 0.43                       |
|                                              | corrected p-value (Cox) | 0.42                         | 0.26                         | 0.25             | 0.86             | 0.92                  | 0.60                       |
|                                              | hazard ratio (Cox)      | 0.09                         | 0.15                         | 0.07             | 0.81             | 1.17                  | 0.68                       |
|                                              | # samples               | 114                          | 114                          | 114              | 114              | 114                   | 114                        |
| LUSC                                         | p-value (Cox)           | 0.62                         | 0.02                         | 0.65             | 0.52             | 0.34                  | 0.82                       |
|                                              | corrected p-value (Cox) | 0.66                         | 0.09                         | 0.70             | 0.86             | 0.89                  | 0.88                       |
|                                              | hazard ratio (Cox)      | 0.34                         | 0.16                         | 0.41             | 0.64             | 0.52                  | 1.16                       |
|                                              | # samples               | 85                           | 85                           | 85               | 85               | 85                    | 85                         |
| SKCM                                         | p-value (Cox)           | 0.53                         | 0.63                         | 0.45             | 0.81             | 0.07                  | 0.29                       |
|                                              | corrected p-value (Cox) | 0.66                         | 0.68                         | 0.63             | 0.86             | 0.89                  | 0.53                       |
|                                              | hazard ratio (Cox)      | 0.41                         | 0.56                         | 0.35             | 1.24             | 4.44                  | 0.48                       |
|                                              | # samples               | 54                           | 54                           | 54               | 54               | 54                    | 54                         |
| CESC                                         | p-value (Cox)           | 0.56                         | 0.11                         | 0.44             | 0.28             | 0.86                  | 0.11                       |
|                                              | corrected p-value (Cox) | 0.66                         | 0.30                         | 0.63             | 0.73             | 0.92                  | 0.53                       |
|                                              | hazard ratio (Cox)      | 0.14                         | 0.13                         | 0.01             | 3.30             | 0.78                  | 5.33                       |
|                                              | # samples               | 33                           | 33                           | 33               | 33               | 33                    | 33                         |

### Supplementary Table 4.3

**Prognostic significance of genetic ITH and cell-proliferation rate across cancers.** P-values and hazard ratios from univariate Cox models. P-values below 0.05 are marked blue. The magnitude of the hazard ratio is color-coded (yellow: favorable outcome; red: poor outcome; gray: moderate effect). Where variables did not satisfy the proportionality assumption for the Cox model ( $P < 0.05$ ), the corresponding hazard ratios are flagged (\*). Two clinical endpoints are shown: **(a)** overall survival and **(b)** progression-free survival. NA:= not available.

**a**

|                                     |                         | Progression Index (EXPANDS) | Progression Index (PyClone) | Clone number (EXPANDS) | Purity normalized Clone number (EXPANDS) | Clone number (PyClone) | Nuclear diversity rank (H&E) | MKI67    |
|-------------------------------------|-------------------------|-----------------------------|-----------------------------|------------------------|------------------------------------------|------------------------|------------------------------|----------|
| All cancers (including PRAD & THCA) | p-value (Cox)           | 3.17E-07                    | 0.01                        | 0.08                   | 0.23                                     | 0.27                   | 0.09                         | 1.40E-04 |
|                                     | corrected p-value (Cox) | 2.22E-06                    | 0.02                        | 0.53                   | 0.82                                     | 0.77                   | 0.46                         | 1.68E-03 |
|                                     | hazard ratio (Cox)      | 2.86                        | 1.67                        | 1.64                   | 1.43                                     | 1.36                   | 0.70                         | 3.49*    |
|                                     | # samples               | 1157                        | 1157                        | 1157                   | 1157                                     | 1099                   | 924                          | 852      |
| STAD                                | p-value (Cox)           | 0.36                        | 0.63                        | 0.73                   | 0.78                                     | 0.85                   | 0.26                         | NA       |
|                                     | corrected p-value (Cox) | 0.62                        | 0.68                        | 0.94                   | 0.84                                     | 1.00                   | 0.51                         | NA       |
|                                     | hazard ratio (Cox)      | 1.85                        | 1.36                        | 0.75                   | 0.80                                     | 0.86                   | 0.43                         | NA       |
|                                     | # samples               | 142                         | 142                         | 142                    | 142                                      | 141                    | 92                           | NA       |
| GBM                                 | p-value (Cox)           | 0.04                        | 1.62E-03                    | 0.55                   | 0.71                                     | 0.03                   | 0.45                         | 0.55     |
|                                     | corrected p-value (Cox) | 0.11                        | 0.01                        | 0.92                   | 0.82                                     | 0.31                   | 0.55                         | 0.68     |
|                                     | hazard ratio (Cox)      | 2.27                        | 3.84                        | 1.44                   | 1.27                                     | 2.72                   | 1.50                         | 1.40*    |
|                                     | # samples               | 103                         | 103                         | 103                    | 103                                      | 101                    | 77                           | 39       |
| LGG                                 | p-value (Cox)           | 1.60E-03                    | 0.24                        | 0.50                   | 0.30                                     | 0.60                   | 0.14                         | 0.01     |
|                                     | corrected p-value (Cox) | 0.01                        | 0.43                        | 0.92                   | 0.82                                     | 1.00                   | 0.46                         | 0.02     |
|                                     | hazard ratio (Cox)      | 4.04                        | 1.77                        | 0.58                   | 0.38                                     | 0.67                   | 2.99                         | 10.52    |
|                                     | # samples               | 166                         | 166                         | 166                    | 166                                      | 145                    | 124                          | 162      |
| Glioma (GBM+LGG)                    | p-value (Cox)           | 2.28E-09                    | 1.42E-05                    | 0.03                   | 0.55                                     | 0.04                   | 0.01                         | 4.73E-03 |
|                                     | corrected p-value (Cox) | 3.20E-08                    | 1.98E-04                    | 0.45                   | 0.82                                     | 0.31                   | 0.16                         | 0.02     |
|                                     | hazard ratio (Cox)      | 6.70                        | 4.04                        | 3.25                   | 1.44                                     | 2.34                   | 2.76                         | 6.49     |
|                                     | # samples               | 269                         | 269                         | 269                    | 269                                      | 246                    | 201                          | 201      |
| KIRC                                | p-value (Cox)           | 0.02                        | 0.04                        | 0.67                   | 0.69                                     | 0.58                   | 0.40                         | 0.26     |
|                                     | corrected p-value (Cox) | 0.06                        | 0.13                        | 0.93                   | 0.82                                     | 1.00                   | 0.55                         | 0.52     |
|                                     | hazard ratio (Cox)      | 5.92                        | 3.48                        | 0.55                   | 0.58                                     | 0.57                   | 0.40*                        | 3.53     |
|                                     | # samples               | 65                          | 65                          | 65                     | 65                                       | 60                     | 61                           | 65       |
| HNSC                                | p-value (Cox)           | 0.44                        | 0.35                        | 0.98                   | 0.98                                     | 0.07                   | 0.64                         | 0.88     |
|                                     | corrected p-value (Cox) | 0.68                        | 0.55                        | 1.00                   | 0.98                                     | 0.35                   | 0.69                         | 0.88     |
|                                     | hazard ratio (Cox)      | 1.36                        | 1.40                        | 0.98                   | 1.02                                     | 0.29                   | 0.80                         | 1.11     |
|                                     | # samples               | 165                         | 165                         | 165                    | 165                                      | 164                    | 113                          | 162      |
| LUAD                                | p-value (Cox)           | 0.72                        | 0.05                        | 0.22                   | 0.17                                     | 0.93                   | 0.27                         | 0.18     |
|                                     | corrected p-value (Cox) | 0.92                        | 0.13                        | 0.78                   | 0.82                                     | 1.00                   | 0.51                         | 0.50     |
|                                     | hazard ratio (Cox)      | 0.78                        | 0.32                        | 0.31                   | 0.26                                     | 0.93*                  | 0.40                         | 3.24     |
|                                     | # samples               | 77                          | 77                          | 77                     | 77                                       | 77                     | 71                           | 69       |
| BLCA                                | p-value (Cox)           | 0.35                        | 0.25                        | 0.58                   | 0.68                                     | 0.28                   | 0.18                         | 0.34     |
|                                     | corrected p-value (Cox) | 0.62                        | 0.43                        | 0.92                   | 0.82                                     | 0.77                   | 0.46                         | 0.59     |
|                                     | hazard ratio (Cox)      | 0.53                        | 0.51                        | 0.64                   | 0.72                                     | 0.40                   | 0.36*                        | 2.69*    |
|                                     | # samples               | 114                         | 114                         | 114                    | 114                                      | 112                    | 113                          | 83       |
| LUSC                                | p-value (Cox)           | 0.93                        | 0.49                        | 0.12                   | 0.09                                     | 0.80                   | 0.43                         | 0.56     |
|                                     | corrected p-value (Cox) | 0.93                        | 0.60                        | 0.54                   | 0.82                                     | 1.00                   | 0.55                         | 0.68     |
|                                     | hazard ratio (Cox)      | 1.07*                       | 0.61                        | 0.17                   | 0.14                                     | 1.28                   | 0.48                         | 2.51     |
|                                     | # samples               | 85                          | 85                          | 85                     | 85                                       | 84                     | 67                           | 84       |
| SKCM                                | p-value (Cox)           | 0.93                        | 0.51                        | 0.31                   | 0.29                                     | 0.95                   | 0.80                         | 0.42     |
|                                     | corrected p-value (Cox) | 0.93                        | 0.60                        | 0.87                   | 0.82                                     | 1.00                   | 0.80                         | 0.62     |
|                                     | hazard ratio (Cox)      | 1.10                        | 0.52                        | 0.34                   | 0.33                                     | 1.06                   | 1.25                         | 0.33     |
|                                     | # samples               | 54                          | 54                          | 54                     | 54                                       | 53                     | 53                           | 45       |
| CESC                                | p-value (Cox)           | 0.27                        | 0.11                        | 0.59                   | 0.40                                     | 0.67                   | 0.15                         | 0.85     |
|                                     | corrected p-value (Cox) | 0.62                        | 0.25                        | 0.92                   | 0.82                                     | 1.00                   | 0.46                         | 0.88     |
|                                     | hazard ratio (Cox)      | 0.37                        | 0.21                        | 0.47                   | 0.28                                     | 0.58                   | 0.18                         | 0.80     |
|                                     | # samples               | 33                          | 33                          | 33                     | 33                                       | 33                     | 33                           | 32       |

**b**

|                                     |                         | Progression Index (EXPANDS) | Progression Index (PyClone) | Clone number (EXPANDS) | Purity normalized Clone number (EXPANDS) | Clone number (PyClone) | Nuclear diversity rank (H&E) | MKI67 |
|-------------------------------------|-------------------------|-----------------------------|-----------------------------|------------------------|------------------------------------------|------------------------|------------------------------|-------|
| All cancers (including PRAD & THCA) | p-value (Cox)           | 1.19E-03                    | 0.32                        | 0.42                   | 0.67                                     | 0.24                   | 0.01                         | 0.01  |
|                                     | corrected p-value (Cox) | 0.01                        | 0.56                        | 0.83                   | 0.85                                     | 0.71                   | 0.08                         | 0.04  |
|                                     | hazard ratio (Cox)      | 1.81                        | 1.18                        | 1.22                   | 1.12                                     | 1.34                   | 0.58                         | 2.24  |
|                                     | # samples               | 1157                        | 1157                        | 1157                   | 1157                                     | 1099                   | 924                          | 852   |
| STAD                                | p-value (Cox)           | 0.71                        | 0.65                        | 0.23                   | 0.25                                     | 0.48                   | 0.03                         | NA    |
|                                     | corrected p-value (Cox) | 0.93                        | 0.79                        | 0.83                   | 0.85                                     | 0.74                   | 0.13                         | NA    |
|                                     | hazard ratio (Cox)      | 1.24                        | 0.79                        | 0.38                   | 0.41                                     | 0.60                   | 0.24                         | NA    |
|                                     | # samples               | 142                         | 142                         | 142                    | 142                                      | 141                    | 92                           | NA    |
| GBM                                 | p-value (Cox)           | 0.26                        | 0.17                        | 0.77                   | 0.51                                     | 0.25                   | 0.99                         | 0.72  |
|                                     | corrected p-value (Cox) | 0.62                        | 0.53                        | 0.97                   | 0.85                                     | 0.71                   | 0.99                         | 0.78  |
|                                     | hazard ratio (Cox)      | 1.53                        | 1.79                        | 0.85                   | 0.68                                     | 1.69                   | 0.99                         | 1.23  |
|                                     | # samples               | 103                         | 103                         | 103                    | 103                                      | 101                    | 77                           | 39    |
| LGG                                 | p-value (Cox)           | 0.07                        | 0.63                        | 0.25                   | 0.17                                     | 0.44                   | 0.12                         | 0.15  |
|                                     | corrected p-value (Cox) | 0.35                        | 0.79                        | 0.83                   | 0.85                                     | 0.74                   | 0.35                         | 0.40  |
|                                     | hazard ratio (Cox)      | 1.99                        | 1.23                        | 0.48                   | 0.37                                     | 0.62                   | 2.50                         | 2.99  |
|                                     | # samples               | 166                         | 166                         | 166                    | 166                                      | 145                    | 124                          | 162   |
| Glioma (GBM+LGG)                    | p-value (Cox)           | 3.21E-06                    | 4.41E-03                    | 0.25                   | 0.74                                     | 0.25                   | 0.02                         | 0.09  |
|                                     | corrected p-value (Cox) | 4.49E-05                    | 0.06                        | 0.83                   | 0.86                                     | 0.71                   | 0.11                         | 0.38  |
|                                     | hazard ratio (Cox)      | 3.78                        | 2.32                        | 1.76                   | 0.83                                     | 1.55                   | 2.39                         | 2.82  |
|                                     | # samples               | 269                         | 269                         | 269                    | 269                                      | 246                    | 201                          | 201   |
| KIRC                                | p-value (Cox)           | 0.14                        | 0.08                        | 0.56                   | 0.63                                     | 0.36                   | 0.62                         | 0.31  |
|                                     | corrected p-value (Cox) | 0.48                        | 0.49                        | 0.83                   | 0.85                                     | 0.74                   | 0.87                         | 0.47  |
|                                     | hazard ratio (Cox)      | 2.82                        | 2.51                        | 0.50                   | 0.57                                     | 0.41                   | 0.61                         | 2.59  |
|                                     | # samples               | 65                          | 65                          | 65                     | 65                                       | 60                     | 61                           | 65    |
| HNSC                                | p-value (Cox)           | 0.79                        | 0.68                        | 0.96                   | 0.94                                     | 0.23                   | 0.72                         | 0.52  |
|                                     | corrected p-value (Cox) | 0.93                        | 0.79                        | 1.00                   | 0.94                                     | 0.71                   | 0.91                         | 0.62  |
|                                     | hazard ratio (Cox)      | 1.10                        | 1.14                        | 0.97                   | 1.06                                     | 0.50                   | 1.18                         | 1.47  |
|                                     | # samples               | 165                         | 165                         | 165                    | 165                                      | 164                    | 113                          | 162   |
| LUAD                                | p-value (Cox)           | 1.00                        | 0.27                        | 0.55                   | 0.53                                     | 0.85                   | 0.93                         | 0.38  |
|                                     | corrected p-value (Cox) | 1.00                        | 0.55                        | 0.83                   | 0.85                                     | 0.94                   | 0.99                         | 0.51  |
|                                     | hazard ratio (Cox)      | 1.00                        | 0.59                        | 0.66                   | 0.64                                     | 0.88                   | 1.06                         | 1.87  |
|                                     | # samples               | 77                          | 77                          | 77                     | 77                                       | 77                     | 71                           | 69    |
| BLCA                                | p-value (Cox)           | 0.35                        | 0.24                        | 0.48                   | 0.55                                     | 0.19                   | 0.20                         | 0.19  |
|                                     | corrected p-value (Cox) | 0.70                        | 0.55                        | 0.83                   | 0.85                                     | 0.71                   | 0.40                         | 0.40  |
|                                     | hazard ratio (Cox)      | 0.55                        | 0.53                        | 0.58                   | 0.64                                     | 0.33                   | 0.39                         | 3.49  |
|                                     | # samples               | 114                         | 114                         | 114                    | 114                                      | 112                    | 113                          | 83    |
| LUSC                                | p-value (Cox)           | 0.40                        | 0.92                        | 0.92                   | 0.80                                     | 0.65                   | 0.10                         | 0.23  |
|                                     | corrected p-value (Cox) | 0.70                        | 0.92                        | 1.00                   | 0.86                                     | 0.86                   | 0.35                         | 0.40  |
|                                     | hazard ratio (Cox)      | 2.00                        | 0.93                        | 0.91                   | 0.80                                     | 1.46                   | 0.25                         | 5.26  |
|                                     | # samples               | 85                          | 85                          | 85                     | 85                                       | 84                     | 67                           | 84    |
| SKCM                                | p-value (Cox)           | 0.45                        | 0.19                        | 0.31                   | 0.27                                     | 0.87                   | 0.84                         | 0.24  |
|                                     | corrected p-value (Cox) | 0.70                        | 0.53                        | 0.83                   | 0.85                                     | 0.94                   | 0.98                         | 0.40  |
|                                     | hazard ratio (Cox)      | 0.46                        | 0.29                        | 0.35                   | 0.33                                     | 0.87                   | 1.19                         | 0.18  |
|                                     | # samples               | 54                          | 54                          | 54                     | 54                                       | 53                     | 53                           | 45    |
| CESC                                | p-value (Cox)           | 0.27                        | 0.11                        | 0.59                   | 0.40                                     | 0.67                   | 0.15                         | 0.85  |
|                                     | corrected p-value (Cox) | 0.62                        | 0.49                        | 0.83                   | 0.85                                     | 0.86                   | 0.35                         | 0.85  |
|                                     | hazard ratio (Cox)      | 0.37                        | 0.21                        | 0.47                   | 0.28                                     | 0.58                   | 0.18                         | 0.80  |
|                                     | # samples               | 33                          | 33                          | 33                     | 33                                       | 33                     | 33                           | 32    |

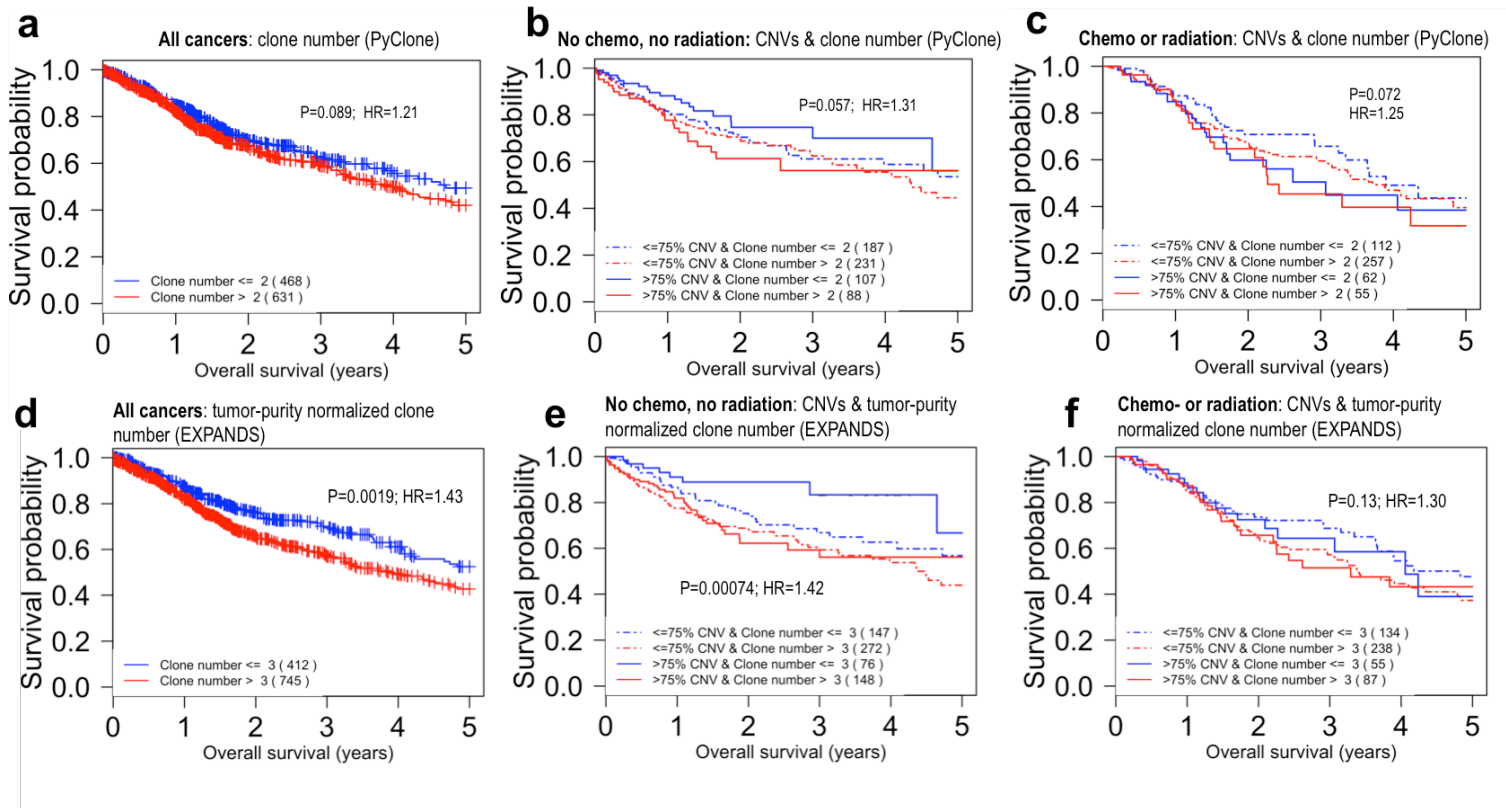

### Supplementary Figure 4.4

**Prognostic significance of genetic ITH based on PyClone results and based on purity normalized EXPANDS results.** (a) Survival curves are stratified by the number of clones detected by PyClone across 12 tumor types (Log-rank test:  $P=0.089$ ;  $HR=1.21$ ). (b) Untreated individuals and (c) individuals treated with chemo- or radiotherapy are stratified by the clone number predicted by PyClone (red vs. blue lines) and by CNV abundance (dashed vs. continuous lines). [The stratification-thresholds for clone number and CNV abundance mark the transition (in clone number and CNV burden respectively), which is accompanied by the greatest change in hazard (see main Fig. 5a-d and Supplementary Fig. 4.5a)]. (d-f) Survival curves are stratified by the number of clones detected by EXPANDS after taking into account tumor purity (Supplementary Figure 2.3a). (d) The presence of  $>3$  clones in the tumor sample predicts poor outcome (Log-rank test:  $P=1.9E-3$ ,  $HR=1.43$ ). (e) Untreated individuals with  $\leq 3$  clones in their tumors (blue lines) survive longer than untreated individuals with  $>3$  clones detected in their tumors (red lines). The prognosis of this patient-group (who did not receive chemo- or radiotherapy), is especially good when  $\leq 3$  clones carry a large CNV burden (blue continuous line). (f) This is not the case for individuals treated with chemo- or radiotherapy. [The threshold of 2 used throughout the manuscript for stratification based on clone number is equivalent to a threshold of 3 when accounting for normal cell contamination among tumor samples, i.e. for purity normalized clone numbers].



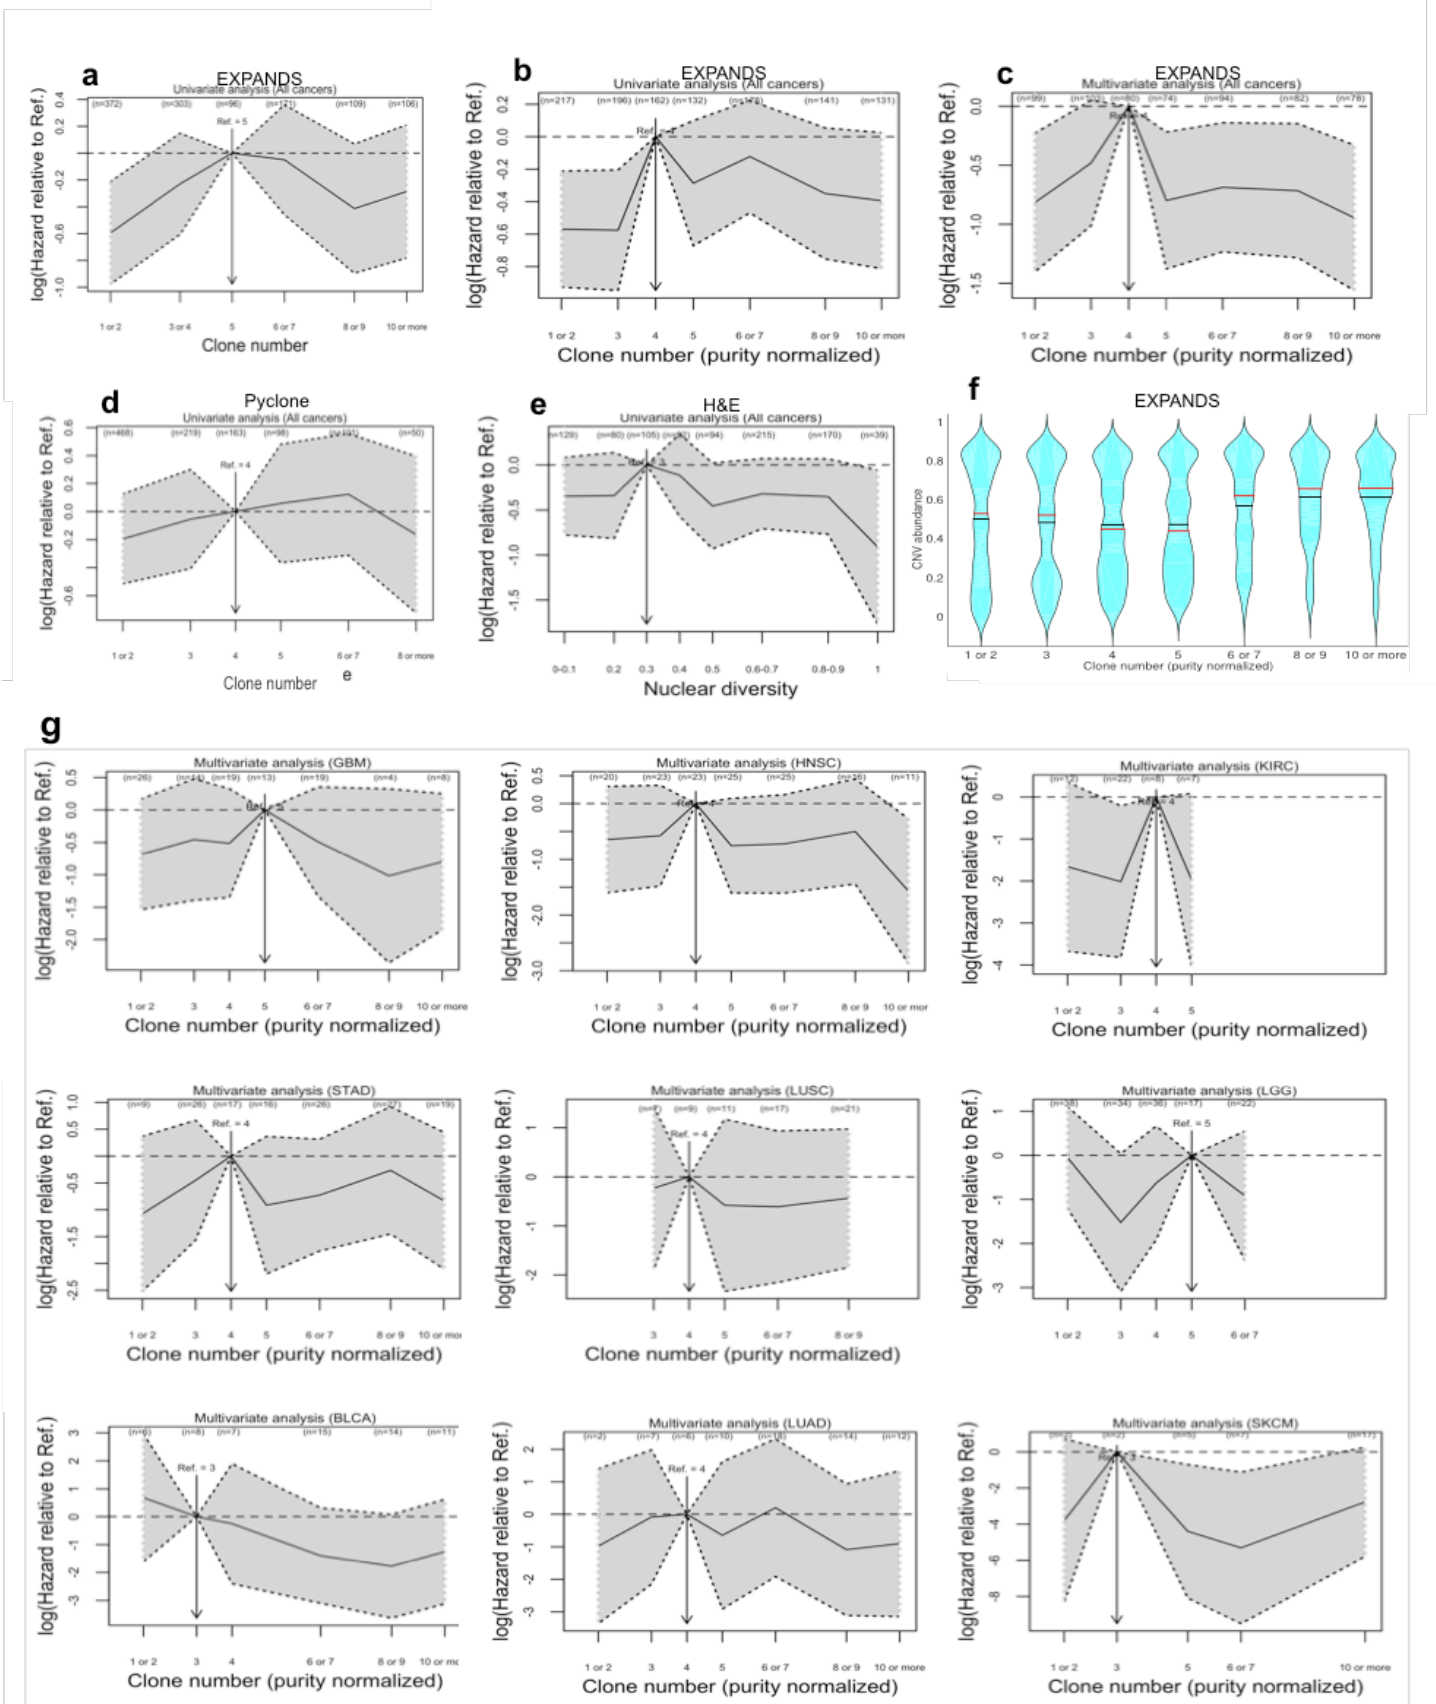

**Supplementary Figure 4.5**

**Relation of ITH to prognosis and CNV burden. (a-e)** Cox models of overall survival across 12 tumor types. The hazard of individuals with low or high ITH (x-axis) is calculated relative to the hazard of individuals with

intermediate ITH and is displayed along with 95%-confidence bands. Hazard ratios (y-axis: log-scale) were calculated for alternative measures of ITH: **(a)** clone number inferred by EXPANDS; **(b,c)** purity normalized clone number (see Supplementary Figure 2.3) **(d)** clone number inferred by Pyclone and **(e)** nuclear ITH. (Covariates included in multivariate analysis are listed Table 1). **(f)** Correlation between the number of clones detected by EXPANDS (x-axis) and the fraction of the tumor-metagenome affected by CNVs (CNV abundance; y-axis; Pearson  $r=0.17$ ,  $P=2.1E-9$ ). **(g)** Tumor type specific multivariate Cox models of overall survival. Clone number predicted by EXPANDS was normalized to account for tumor purity and was included as categorical variable into tumor-type specific multivariate Cox models (see also Supplementary Table 4.10).

### Supplementary Table 4.6

**Prognostic significance of low/high CNV abundance in an independent dataset.** CNVs measured on genome-wide SNP arrays (Affymetrix 6.0) in an independent dataset consisting of 2,010 tumor samples (74 adrenocortical carcinomas, 989 breast invasive carcinomas, 427 colon adenocarcinomas, 65 kidney chromophobes, 162 rectum adenocarcinomas, 108 sarcomas and 185 ovarian serous cystadenocarcinomas) confirm that the presence of CNVs affecting very low or very high fractions of the genome (low/high CNV abundance) is a significant protective factor. Shown are p-values and hazard ratios obtained from univariate Cox models testing the association between low/high CNV abundance and overall survival, within and across cancer types.

| Cancer type        | Statistic    | Low/high CNV abundance |
|--------------------|--------------|------------------------|
| <b>All cancers</b> | p-value      | 5.60E-05               |
|                    | hazard ratio | 0.27                   |
|                    | # Samples    | 2010                   |
| <b>ACC</b>         | p-value      | 0.47                   |
|                    | hazard ratio | 0.53                   |
|                    | # Samples    | 74                     |
| <b>BRCA</b>        | p-value      | 0.09                   |
|                    | hazard ratio | 0.32                   |
|                    | # Samples    | 989                    |
| <b>COAD</b>        | p-value      | 0.04                   |
|                    | hazard ratio | 0.36                   |
|                    | # Samples    | 427                    |
| <b>KICH</b>        | p-value      | 0.01                   |
|                    | hazard ratio | 0.00                   |
|                    | # Samples    | 65                     |
| <b>READ</b>        | p-value      | 0.14                   |
|                    | hazard ratio | 0.25                   |
|                    | # Samples    | 162                    |
| <b>SARC</b>        | p-value      | 0.05                   |
|                    | hazard ratio | 0.25                   |
|                    | # Samples    | 108                    |
| <b>OV</b>          | p-value      | 0.59                   |
|                    | hazard ratio | 0.77                   |
|                    | # Samples    | 185                    |

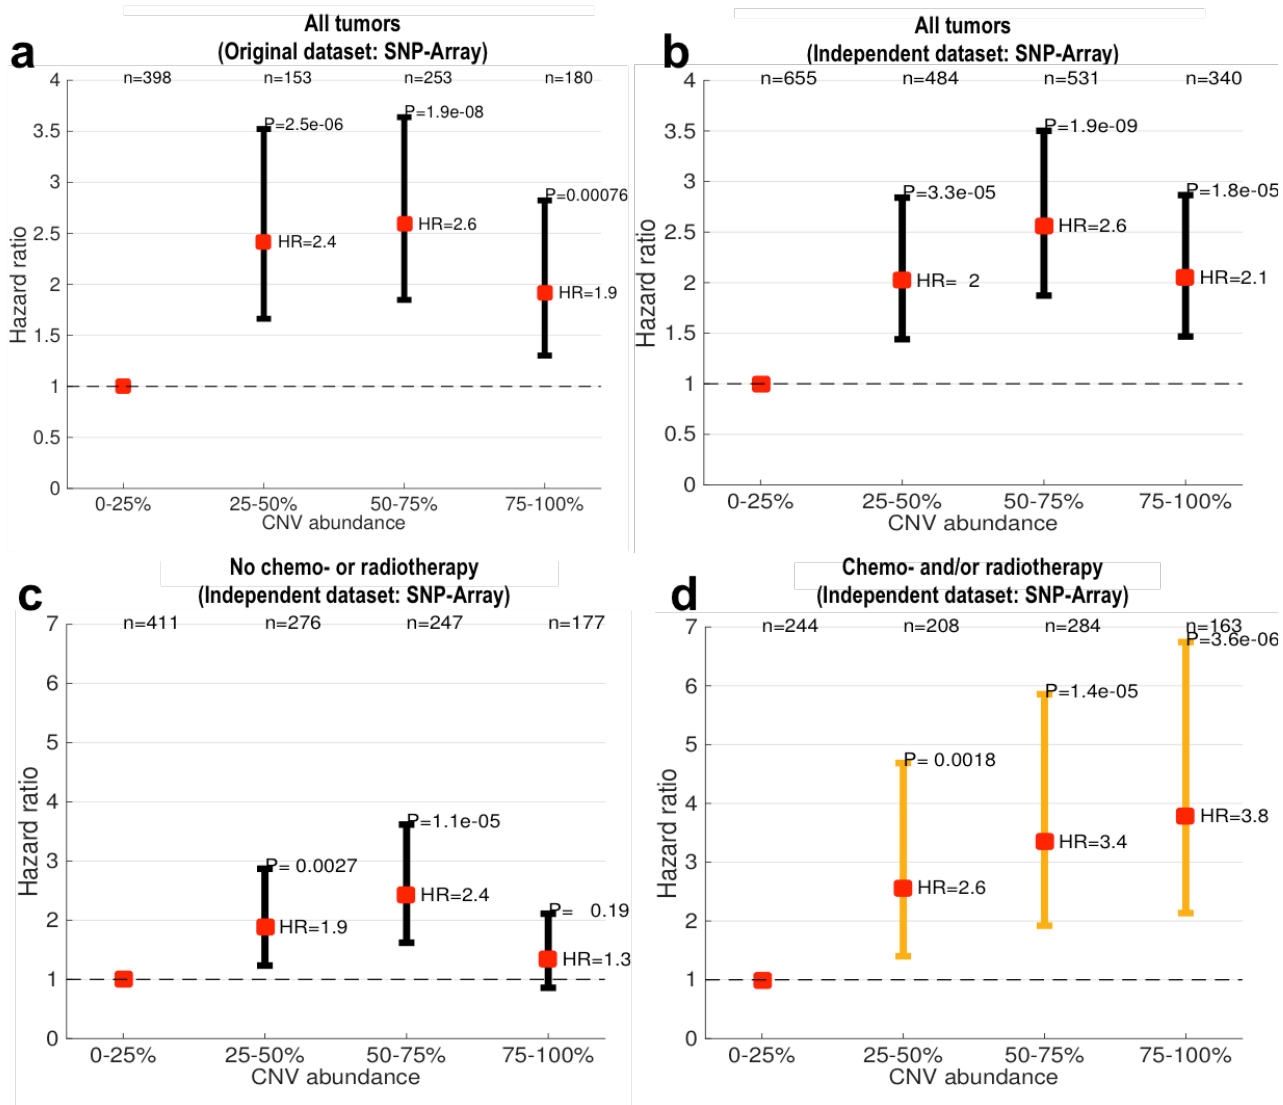

**Supplementary Figure 4.7**

**Relation between CNV abundance and overall survival based on SNP-array datasets.** Hazard ratios as a function of CNV abundance measured on genome-wide SNP arrays (Affymetrix 6.0) in two datasets: **(a)** original tumor-sample set (984 samples overlapping with exome sequenced samples) and **(b-d)** independent dataset (2,010 non-overlapping samples: 74 adrenocortical carcinomas, 989 breast invasive carcinomas, 427 colon adenocarcinomas, 65 kidney chromophobes, 162 rectum adenocarcinomas, 108 sarcomas and 185 ovarian serous cystadenocarcinomas). Independent dataset is further stratified into individuals who did not receive chemo- nor radiotherapy **(c)** and treated individuals **(d)**. Among untreated individuals, tumors with intermediate CNV abundance (25-75%) represent the highest risk groups. Among individuals treated with chemo- or radiotherapy, tumors with high CNV abundance (>75%) represent the highest risk group. For every panel, the hazard ratio for each of the upper three CNV abundance quartiles is calculated relative to the hazard of all individuals in the first quartile (0-25% CNV abundance) and displayed along with its 95% confidence interval.

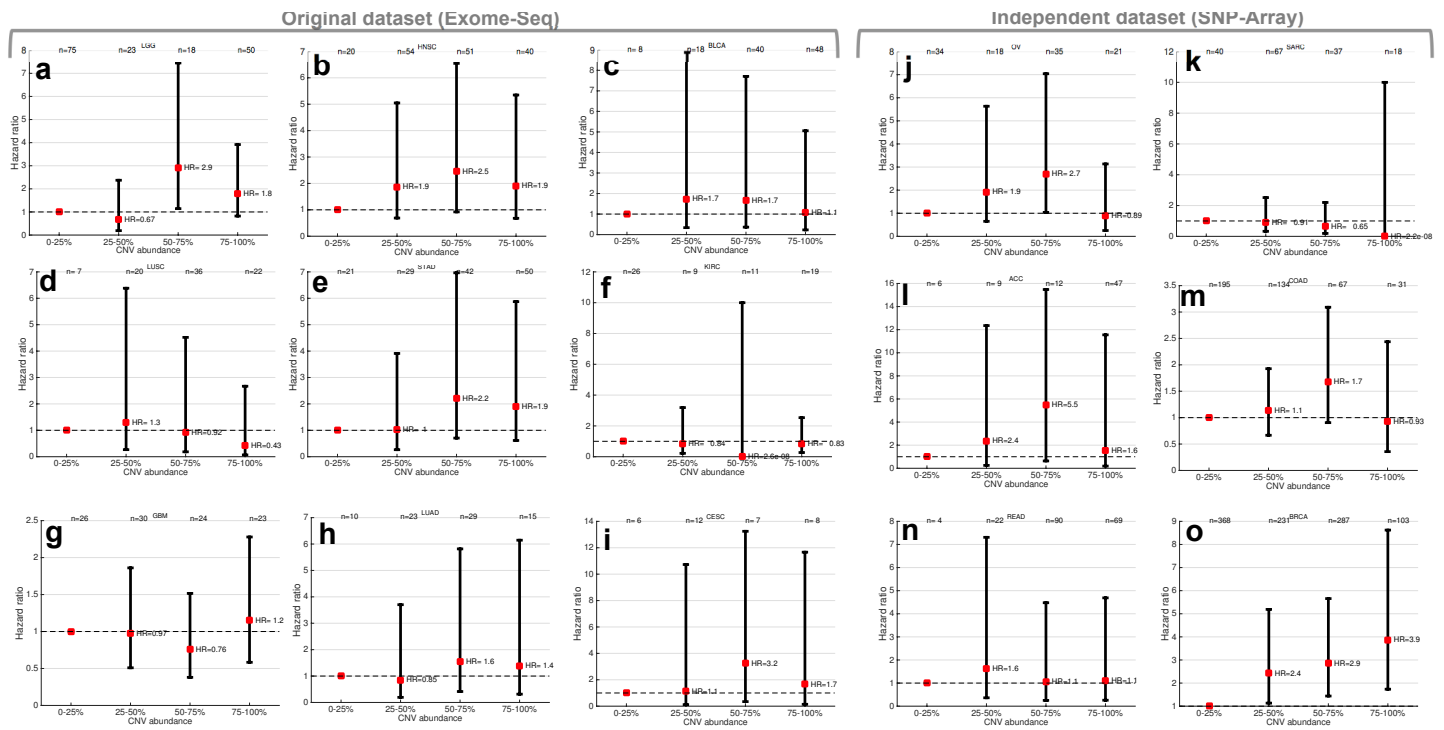

### Supplementary Figure 4.8

**Tumors with CNVs affecting intermediate fractions of the genome represent the highest risk-group across most cancer types.** Hazard ratios as a function of the % tumor-metagenome affected by CNVs (CNV abundance) in (a) low-grade gliomas, (b) head and neck cancer, (c) bladder cancer, (d) lung squamous cell carcinoma, (e) stomach cancer, (f) kidney cancer, (g) glioblastoma, (h) lung adenocarcinoma, (i) cervical cancer, (j) ovarian cancer, (k) sarcoma, (l) adrenocortical carcinoma, (m) colon adenocarcinoma, (n) rectum adenocarcinoma and (o) breast invasive carcinoma. The hazard ratio and 95% confidence interval associated with each CNV abundance quartile is calculated relative to the hazard of individuals in the first quartile (0-25% CNV abundance), using an univariate Cox model.

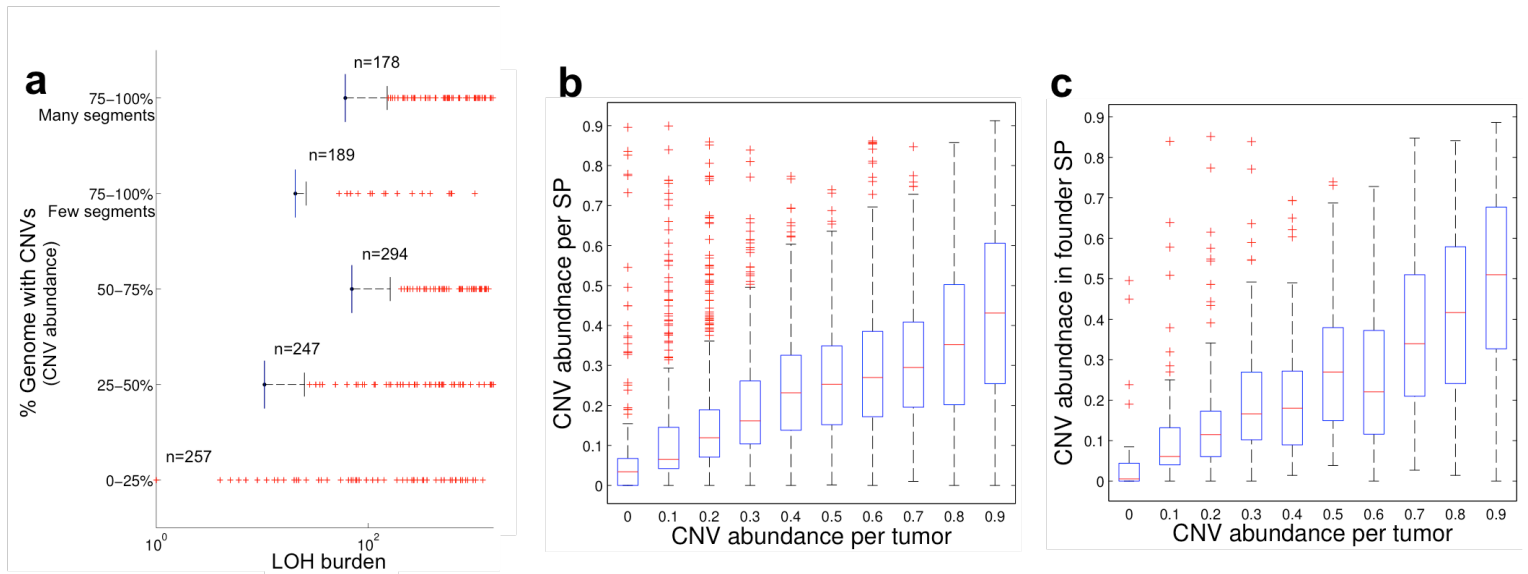

### Supplementary Figure 4.9

**Relation between LOH incidence, CNV abundance per tumor-metagenome and CNV abundance per clone.** **(a)** To ensure that tumors with >75% of their metagenome affected by CNVs (CNV abundance) were not misclassified and in fact have <25% CNV abundance, we compared loss of heterozygosity (LOH) burden between tumors with different levels of CNV abundance. Mean LOH burden in the >75% CNV abundance tumors was more than two times higher than in tumors with <25% CNV abundance (two-sided Kolmogorov-Smirnov test:  $P=0.004$ ). LOH burden per tumor (x-axis), is measured as the number of germline SNPs with heterozygous status in the blood sample and homozygous status in the tumor sample. Tumors with >75% CNV abundance are further stratified according to the level of genome fragmentation, using the mode as stratification threshold. Tumors with few segments have fewer LOH than tumors with many segments, but still considerably increased LOH burden as compared to tumors with <25% CNV abundance. **(b)** As the fraction of the tumor-metagenome that is affected by CNVs increases, so does the variability in the clonal composition of the tumor. Tumors with >75% of their metagenome affected by CNVs have clones (SPs) with approximately 20-60% of their genome affected by CNVs. **(c)** Founder clones carry similar CNV burden (approximately 30-70% of the genome affected by CNVs).

### Supplementary Table 4.10

**Tumor type specific multivariate Cox models of overall survival.** The prognostic significance of clone number and low/high CNV abundance were evaluated in the context of clinical data. One multivariate Cox model was evaluated for each tumor type separately (included covariates vary with tumor type, subject to data availability and model stability). P-values and hazard ratios (HR) associated with differential clone number are shown for each tumor type along with the p-values and hazard ratios of the other covariates included in the multivariate models. The hazard of individuals with a low or high number of clones was calculated relative to the hazard of individuals with an intermediate number of clones (between 3 and 5 clones). Where variables did not satisfy the proportionality assumption for the Cox model ( $P < 0.05$ ), the corresponding hazard ratios are flagged (\*).

| Cancer type | Covariate               | HR     | Log (HR) | P-value |
|-------------|-------------------------|--------|----------|---------|
| BLCA        | 1 or 2 vs. 3 clones     | 1.965  | 0.675    | 0.562   |
| BLCA        | 4 vs. 3 clones          | 0.778  | -0.251   | 0.819   |
| BLCA        | 6 or 7 vs. 3 clones     | 0.248  | -1.396   | 0.108   |
| BLCA        | 8 or 9 vs. 3 clones     | 0.169  | -1.777   | 0.060   |
| BLCA        | 10 or more vs. 3 clones | 0.286  | -1.253   | 0.188   |
| BLCA        | Age at diagnosis        | 0.027  | -3.608   | 0.167   |
| BLCA        | Low/high CNV abundance  | 0.006  | -5.087   | 0.033   |
| BLCA        | MKI67                   | 5E6(*) | 13.149   | 0.011   |
| BLCA        | % Lymphocytes           | 0.440  | -0.820   | 0.895   |
| BLCA        | Grade                   | 0.084  | -2.474   | 0.427   |
| BLCA        | Pathologic stage        | 4.949  | 1.599    | 0.078   |
| CECSC       | 5 vs. 4 clones          | 0.359  | -1.025   | 0.283   |
| CECSC       | Age at diagnosis        | 0.680  | -0.385   | 0.886   |
| CECSC       | Low/high CNV abundance  | 0.058  | -2.848   | 0.622   |
| CECSC       | % Lymphocytes           | 0.045  | -3.106   | 0.056   |
| CECSC       | Grade                   | 0.086  | -2.449   | 0.319   |
| GBM         | 1 or 2 vs. 5 clones     | 0.504  | -0.685   | 0.114   |
| GBM         | 3 vs. 5 clones          | 0.634  | -0.456   | 0.340   |
| GBM         | 4 vs. 5 clones          | 0.599  | -0.512   | 0.230   |
| GBM         | 6 or 7 vs. 5 clones     | 0.613  | -0.490   | 0.254   |
| GBM         | 8 or 9 vs. 5 clones     | 0.362  | -1.016   | 0.137   |
| GBM         | 10 or more vs. 5 clones | 0.449  | -0.801   | 0.135   |
| GBM         | Age at diagnosis        | 2.596  | 0.954    | 0.242   |
| GBM         | % Lymphocytes           | 1.990  | 0.688    | 0.659   |
| HNSC        | 1 or 2 vs. 4 clones     | 0.524  | -0.646   | 0.190   |
| HNSC        | 3 vs. 4 clones          | 0.582  | -0.542   | 0.237   |
| HNSC        | 5 vs. 4 clones          | 0.486  | -0.721   | 0.096   |
| HNSC        | 6 or 7 vs. 4 clones     | 0.497  | -0.700   | 0.119   |
| HNSC        | 8 or 9 vs. 4 clones     | 0.607  | -0.499   | 0.301   |
| HNSC        | 10 or more vs. 4 clones | 0.205  | -1.587   | 0.017   |
| HNSC        | Age at diagnosis        | 10.533 | 2.354    | 0.019   |
| HNSC        | Low/high CNV abundance  | 0.279  | -1.277   | 0.213   |
| HNSC        | MKI67                   | 5.584  | 1.720    | 0.445   |
| HNSC        | % Lymphocytes           | 0.064  | -2.749   | 0.086   |
| HNSC        | Grade                   | 2.998  | 1.098    | 0.120   |

|             |                         |            |         |          |
|-------------|-------------------------|------------|---------|----------|
| <b>HNSC</b> | Pathologic stage        | 1.970      | 0.678   | 0.056    |
| <b>KIRC</b> | 1 or 2 vs. 4 clones     | 0.197      | -1.627  | 0.112    |
| <b>KIRC</b> | 3 vs. 4 clones          | 0.158      | -1.847  | 0.030    |
| <b>KIRC</b> | 5 vs. 4 clones          | 0.143      | -1.947  | 0.066    |
| <b>KIRC</b> | Age at diagnosis        | 244.955    | 5.501   | 0.048    |
| <b>KIRC</b> | Low/high CNV abundance  | 13.790     | 2.624   | 0.780    |
| <b>KIRC</b> | MKI67                   | 63.115     | 4.145   | 0.307    |
| <b>KIRC</b> | Grade                   | 3.049      | 1.115   | 0.589    |
| <b>KIRC</b> | Pathologic stage        | 0.563      | -0.575  | 0.831    |
| <b>LGG</b>  | 1 or 2 vs. 5 clones     | 0.954      | -0.047  | 0.936    |
| <b>LGG</b>  | 3 vs. 5 clones          | 0.224      | -1.496  | 0.060    |
| <b>LGG</b>  | 4 vs. 5 clones          | 0.505      | -0.684  | 0.293    |
| <b>LGG</b>  | 6 or 7 vs. 5 clones     | 0.405      | -0.903  | 0.217    |
| <b>LGG</b>  | Age at diagnosis        | 117.919(*) | 4.770   | 5.58E-05 |
| <b>LGG</b>  | Low/high CNV abundance  | 0.084      | -2.472  | 0.173    |
| <b>LGG</b>  | MKI67                   | 9.722      | 2.274   | 0.082    |
| <b>LGG</b>  | Grade                   | 5.691      | 1.739   | 0.179    |
| <b>LUAD</b> | 1 or 2 vs. 4 clones     | 0.298      | -1.211  | 0.314    |
| <b>LUAD</b> | 3 vs. 4 clones          | 0.684      | -0.380  | 0.702    |
| <b>LUAD</b> | 5 vs. 4 clones          | 0.385      | -0.956  | 0.396    |
| <b>LUAD</b> | 6 or 7 vs. 4 clones     | 1.174      | 0.161   | 0.878    |
| <b>LUAD</b> | 8 or 9 vs. 4 clones     | 0.264      | -1.331  | 0.188    |
| <b>LUAD</b> | 10 or more vs. 4 clones | 0.297      | -1.215  | 0.275    |
| <b>LUAD</b> | Age at diagnosis        | 22.962     | 3.134   | 0.196    |
| <b>LUAD</b> | Low/high CNV abundance  | 0.024      | -3.729  | 0.038    |
| <b>LUAD</b> | MKI67                   | 38.970     | 3.663   | 0.300    |
| <b>LUAD</b> | % Lymphocytes           | 0.000      | -9.200  | 0.106    |
| <b>LUAD</b> | Pathologic stage        | 185.22(*)  | 5.222   | 2.98E-05 |
| <b>SKCM</b> | 1 or 2 vs. 3 clones     | 0.036      | -3.337  | 0.121    |
| <b>SKCM</b> | 5 vs. 3 clones          | 0.019      | -3.979  | 0.026    |
| <b>SKCM</b> | 6 or 7 vs. 3 clones     | 0.009      | -4.722  | 0.016    |
| <b>SKCM</b> | 10 or more vs. 3 clones | 0.093      | -2.374  | 0.085    |
| <b>SKCM</b> | Age at diagnosis        | 11.428     | 2.436   | 0.170    |
| <b>SKCM</b> | Low/high CNV abundance  | 0.741      | -0.300  | 0.945    |
| <b>SKCM</b> | MKI67                   | 0.002      | -6.253  | 0.221    |
| <b>SKCM</b> | % Lymphocytes           | 0.000      | -43.821 | 0.043    |
| <b>SKCM</b> | Pathologic stage        | 3.487      | 1.249   | 0.592    |
| <b>STAD</b> | 1 or 2 vs. 4 clones     | 0.341      | -1.076  | 0.144    |
| <b>STAD</b> | 3 vs. 4 clones          | 0.638      | -0.450  | 0.429    |
| <b>STAD</b> | 5 vs. 4 clones          | 0.401      | -0.914  | 0.161    |
| <b>STAD</b> | 6 or 7 vs. 4 clones     | 0.483      | -0.727  | 0.171    |
| <b>STAD</b> | 8 or 9 vs. 4 clones     | 0.767      | -0.265  | 0.662    |
| <b>STAD</b> | 10 or more vs. 4 clones | 0.436      | -0.830  | 0.201    |
| <b>STAD</b> | Age at diagnosis        | 4.596      | 1.525   | 0.266    |
| <b>STAD</b> | Low/high CNV abundance  | 0.191      | -1.653  | 0.232    |
| <b>STAD</b> | % Lymphocytes           | 0.103(*)   | -2.268  | 0.323    |



|             |                        |        |        |       |
|-------------|------------------------|--------|--------|-------|
| <b>STAD</b> | Grade                  | 13.052 | 2.569  | 0.065 |
| <b>STAD</b> | Pathologic stage       | 8.591  | 2.151  | 0.002 |
| <b>LUSC</b> | 3 vs. 4 clones         | 0.795  | -0.230 | 0.786 |
| <b>LUSC</b> | 5 vs. 4 clones         | 0.560  | -0.579 | 0.517 |
| <b>LUSC</b> | 6 or 7 vs. 4 clones    | 0.544  | -0.609 | 0.439 |
| <b>LUSC</b> | 8 or 9 vs. 4 clones    | 0.647  | -0.435 | 0.545 |
| <b>LUSC</b> | Age at diagnosis       | 2.178  | 0.778  | 0.727 |
| <b>LUSC</b> | Low/high CNV abundance | 0.084  | -2.477 | 0.099 |
| <b>LUSC</b> | MKI67                  | 16.344 | 2.794  | 0.435 |
| <b>LUSC</b> | % Lymphocytes          | 1.025  | 0.025  | 0.990 |
| <b>LUSC</b> | Pathologic stage       | 5.297  | 1.667  | 0.110 |

## References

1. Andor, N., Harness, J. V., Müller, S., Mewes, H. W. & Petritsch, C. EXPANDS: expanding ploidy and allele frequency on nested subpopulations. *Bioinforma. Oxf. Engl.* **30**, 50–60 (2014).
2. Sathirapongsasuti, J. F. *et al.* Exome sequencing-based copy-number variation and loss of heterozygosity detection: ExomeCNV. *Bioinforma. Oxf. Engl.* **27**, 2648–2654 (2011).
3. Cibulskis, K. *et al.* Sensitive detection of somatic point mutations in impure and heterogeneous cancer samples. *Nat. Biotechnol.* **31**, 213–219 (2013).
4. Roth, A. *et al.* JointSNVMix: a probabilistic model for accurate detection of somatic mutations in normal/tumour paired next-generation sequencing data. *Bioinforma. Oxf. Engl.* **28**, 907–913 (2012).
5. Roth, A. *et al.* PyClone: statistical inference of clonal population structure in cancer. *Nat. Methods* **11**, 396–398 (2014).
6. Carpenter, A. E. *et al.* CellProfiler: image analysis software for identifying and quantifying cell phenotypes. *Genome Biol.* **7**, R100 (2006).
7. Armitage, P. & Doll, R. The Age Distribution of Cancer and a Multi-stage Theory of Carcinogenesis. *Br. J. Cancer* **8**, 1 (1954).
8. Yoshihara, K. *et al.* Inferring tumour purity and stromal and immune cell admixture from expression data. *Nat. Commun.* **4**, (2013).
